# Supplementary material
Source: publisher figshare collection journal article supplement (https://acs.figshare.com/ndownloader/files/22007559)
Supplement: Supplementary file 1 [file 22007559]

## Sheet: Table S4 
Table S4: Protein quantification in FP vs. DPP from PEAKS.
Protein Group	Protein ID	Accession	Significance	Coverage (%)	#Peptides	#Unique	PTM	17 FP-1 Area	17 FP-2 Area	17 FP-3 Area	19 FP-1 Area	19 FP-2 Area	19 FP-3 Area	20 FP-1 Area	20 FP-2 Area	20 FP-3 Area	18 DPP-1 Area	18 DPP-2 Area	18 DPP-3 Area	19 DPP-1 Area	19 DPP-2 Area	19 DPP-3 Area	20 DPP-1 Area	20 DPP-2 Area	20 DPP-3 Area	17 FP-1 Area (top-3 peptides)	17 FP-2 Area (top-3 peptides)	17 FP-3 Area (top-3 peptides)	19 FP-1 Area (top-3 peptides)	19 FP-2 Area (top-3 peptides)	19 FP-3 Area (top-3 peptides)	20 FP-1 Area (top-3 peptides)	20 FP-2 Area (top-3 peptides)	20 FP-3 Area (top-3 peptides)	18 DPP-1 Area (top-3 peptides)	18 DPP-2 Area (top-3 peptides)	18 DPP-3 Area (top-3 peptides)	19 DPP-1 Area (top-3 peptides)	19 DPP-2 Area (top-3 peptides)	19 DPP-3 Area (top-3 peptides)	20 DPP-1 Area (top-3 peptides)	20 DPP-2 Area (top-3 peptides)	20 DPP-3 Area (top-3 peptides)	Sample Profile (Ratio)	FP Area	DPP Area	FP Area (top-3 peptides)	DPP Area (top-3 peptides)	Group Profile (Ratio)
96	38	ag|015662|NODE_1980155	86.85	11	6	1	Carbamidomethylation	4970	0	7920	21600	0	0	0	0	0	0	0	0	440000	306000	327000	0	0	0	4970	0	7920	21600	0	0	0	0	0	0	0	0	440000	306000	327000	0	0	0	64.00:-:64.00:64.00:-:-:-:-:-:-:-:-:64.00:64.00:64.00:-:-:-	11500	358000	11500	358000	1.00:31.10
15	75	ag|050292|140304CS1901052300004	74.69	59	16	2	Carbamidomethylation; Deamidation (NQ); Pyro-glu from Q; Hydroxylation; Acetylation (N-term); 2 more	959000	1030000	934000	424000	470000	460000	608000	563000	597000	2190000	2320000	2210000	3950000	3880000	3880000	3770000	3710000	3610000	745000	792000	727000	334000	359000	364000	443000	436000	449000	1830000	1890000	1870000	3220000	3150000	3230000	3010000	2940000	2870000	1.71:1.82:1.67:0.77:0.82:0.83:1.02:1.00:1.03:4.20:4.34:4.28:7.38:7.22:7.40:6.90:6.74:6.59	671000	3280000	516000	2670000	1.00:5.17
253	437	ag|173157|Deer_XM_015099418.1	49.86	28	4	4	Carbamidomethylation	408000	403000	380000	604000	651000	641000	680000	680000	706000	1760000	1870000	1860000	1860000	1830000	1840000	1710000	1630000	1630000	295000	288000	303000	477000	507000	518000	533000	531000	560000	1760000	1800000	1780000	1490000	1500000	1540000	1470000	1390000	1370000	0.56:0.54:0.57:0.90:0.95:0.98:1.00:1.00:1.05:3.31:3.38:3.36:2.80:2.82:2.90:2.76:2.61:2.58	573000	1800000	446000	1570000	1.00:3.51
130	343	ag|164201|Deer_XM_005206502.3	31.53	36	5	5	Carbamidomethylation; Acetylation (Protein N-term)	601000	632000	588000	679000	690000	710000	833000	859000	884000	1600000	1640000	1600000	1920000	1820000	1810000	1460000	1420000	1340000	459000	487000	444000	440000	443000	468000	649000	654000	678000	1540000	1570000	1550000	1370000	1290000	1310000	1190000	1150000	1090000	0.70:0.74:0.68:0.67:0.68:0.72:0.99:1.00:1.04:2.36:2.40:2.37:2.09:1.97:1.99:1.81:1.76:1.66	730000	1620000	525000	1340000	1.00:2.55
51	54	ag|042538|NODE_966432	30.19	50	14	14	Carbamidomethylation; Methylation(others); Ubiquitin	4650000	4770000	4670000	11000000	11600000	11800000	12400000	12900000	13400000	2590000	2610000	2710000	6680000	6700000	4930000	5130000	5080000	4880000	1510000	1570000	1450000	4440000	4610000	4750000	5270000	5370000	5680000	277000	279000	284000	2830000	3030000	1510000	1680000	1640000	1650000	0.28:0.29:0.27:0.83:0.86:0.89:0.98:1.00:1.06:0.05:0.05:0.05:0.53:0.56:0.28:0.31:0.31:0.31	10400000	6460000	4550000	2820000	1.00:0.62
51	55	ag|178894|Deer_XM_012168756.2	30.19	35	14	14	Carbamidomethylation; Methylation(others); Ubiquitin	4650000	4770000	4670000	11000000	11600000	11800000	12400000	12900000	13400000	2590000	2610000	2710000	6680000	6700000	4930000	5130000	5080000	4880000	1510000	1570000	1450000	4440000	4610000	4750000	5270000	5370000	5680000	277000	279000	284000	2830000	3030000	1510000	1680000	1640000	1650000	0.28:0.29:0.27:0.83:0.86:0.89:0.98:1.00:1.06:0.05:0.05:0.05:0.53:0.56:0.28:0.31:0.31:0.31	10400000	6460000	4550000	2820000	1.00:0.62
58	209	ag|045959|140304CS1901017300001	24.81	31	8	8	Carbamidomethylation; Deamidation (NQ)	9220000	9670000	8860000	10100000	10300000	11000000	8470000	8720000	8620000	3860000	4200000	4010000	6000000	6420000	6150000	3400000	3430000	3380000	6220000	6370000	6000000	6390000	6370000	6870000	4830000	5070000	5360000	2800000	2980000	2900000	3230000	3910000	3720000	2040000	2010000	2010000	1.23:1.26:1.18:1.26:1.26:1.36:0.95:1.00:1.06:0.55:0.59:0.57:0.64:0.77:0.73:0.40:0.40:0.40	9880000	5060000	6380000	3330000	1.00:0.52
579	1222	ag|003365|NODE_1223868	23.04	14	1	1		0	0	0	0	35400	0	0	53300	45900	66200	71600	76600	0	50800	0	34500	41800	40000	0	0	0	0	35400	0	0	53300	45900	66200	71600	76600	0	50800	0	34500	41800	40000	0:0:0:0:0.66:0:0:1.00:0.86:1.24:1.34:1.44:0:0.95:0:0.65:0.78:0.75	44900	54500	44900	54500	1.00:1.21
101	260	ag|134350|tr|Q1PHW1|Q1PHW1_CEREL	22.83	44	8	8	Carbamidomethylation; Pyro-glu from Q	1400000	1390000	1360000	1550000	1590000	1770000	1780000	1790000	2120000	1430000	1530000	1510000	5570000	5630000	5510000	6560000	5370000	6100000	775000	766000	735000	738000	750000	904000	932000	931000	1250000	1030000	1070000	1060000	2700000	2770000	2700000	3700000	2570000	3390000	0.83:0.82:0.79:0.79:0.81:0.97:1.00:1.00:1.34:1.11:1.14:1.13:2.90:2.97:2.90:3.98:2.76:3.64	1650000	5040000	865000	2620000	1.00:3.03
101	261	ag|104717|CS60.230410CS6000050900005	22.83	37	8	8	Carbamidomethylation; Pyro-glu from Q	1400000	1390000	1360000	1550000	1590000	1770000	1780000	1790000	2120000	1430000	1530000	1510000	5570000	5630000	5510000	6560000	5370000	6100000	775000	766000	735000	738000	750000	904000	932000	931000	1250000	1030000	1070000	1060000	2700000	2770000	2700000	3700000	2570000	3390000	0.83:0.82:0.79:0.79:0.81:0.97:1.00:1.00:1.34:1.11:1.14:1.13:2.90:2.97:2.90:3.98:2.76:3.64	1650000	5040000	865000	2620000	1.00:3.03
4	10	ag|101170|CS60.230410CS6000030500001	22.29	54	53	2	Carbamidomethylation; Deamidation (NQ); Pyro-glu from Q; Acetylation (N-term); Formylation; 10 more	3290000	3410000	3050000	2920000	3110000	3270000	3790000	3840000	4100000	24800000	24900000	24200000	3770000	3520000	3530000	13700000	14200000	12800000	3290000	3410000	3050000	2920000	3110000	3270000	3790000	3840000	4100000	24800000	24900000	24200000	3770000	3520000	3530000	13700000	14200000	12800000	0.86:0.89:0.79:0.76:0.81:0.85:0.99:1.00:1.07:6.44:6.49:6.31:0.98:0.92:0.92:3.58:3.70:3.33	4280000	14800000	4280000	14800000	1.00:3.45
327	1627	ag|134388|tr|A6YLN4|A6YLN4_CEREL	21.46	23	2	2	Acetylation (Protein N-term)	217000	256000	207000	491000	517000	534000	1460000	1510000	1560000	3080000	3080000	3100000	306000	325000	278000	1080000	1040000	1020000	20200	19800	16100	66400	69700	71000	335000	329000	357000	2560000	2570000	2610000	48900	48800	43800	362000	349000	338000	0.06:0.06:0.05:0.20:0.21:0.22:1.02:1.00:1.08:7.77:7.81:7.92:0.15:0.15:0.13:1.10:1.06:1.03	750000	1480000	143000	993000	1.00:6.96
316	16972	tr|W5P5A0|W5P5A0_SHEEP	20.03	14	22	2	Carbamidomethylation	158000	147000	148000	152000	117000	117000	164000	154000	165000	234000	227000	216000	543000	313000	529000	316000	276000	270000	158000	147000	148000	152000	117000	117000	164000	154000	165000	234000	227000	216000	543000	313000	529000	316000	276000	270000	1.03:0.96:0.96:0.99:0.76:0.76:1.07:1.00:1.07:1.52:1.47:1.41:3.53:2.03:3.44:2.05:1.79:1.76	147000	351000	147000	351000	1.00:2.39
316	16973	tr|L8I022|L8I022_9CETA	20.03	14	22	2	Carbamidomethylation	158000	147000	148000	152000	117000	117000	164000	154000	165000	234000	227000	216000	543000	313000	529000	316000	276000	270000	158000	147000	148000	152000	117000	117000	164000	154000	165000	234000	227000	216000	543000	313000	529000	316000	276000	270000	1.03:0.96:0.96:0.99:0.76:0.76:1.07:1.00:1.07:1.52:1.47:1.41:3.53:2.03:3.44:2.05:1.79:1.76	147000	351000	147000	351000	1.00:2.39
316	16974	tr|F1N169|F1N169_BOVIN	20.03	14	22	2	Carbamidomethylation	158000	147000	148000	152000	117000	117000	164000	154000	165000	234000	227000	216000	543000	313000	529000	316000	276000	270000	158000	147000	148000	152000	117000	117000	164000	154000	165000	234000	227000	216000	543000	313000	529000	316000	276000	270000	1.03:0.96:0.96:0.99:0.76:0.76:1.07:1.00:1.07:1.52:1.47:1.41:3.53:2.03:3.44:2.05:1.79:1.76	147000	351000	147000	351000	1.00:2.39
87	251	ag|101606|CS60.230410CS6000033200002	19.57	23	9	4	Methylation(others); Ubiquitin	718000	1030000	775000	883000	853000	723000	873000	888000	897000	885000	1030000	1180000	2550000	2190000	2220000	2440000	2630000	2240000	640000	893000	692000	818000	789000	723000	873000	888000	897000	641000	815000	958000	2410000	2030000	2080000	2220000	2460000	1990000	0.72:1.01:0.78:0.92:0.89:0.81:0.98:1.00:1.01:0.72:0.92:1.08:2.72:2.28:2.35:2.50:2.77:2.24	886000	1930000	801000	1730000	1.00:2.16
247	231	ag|035287|NODE_629325	18.32	17	4	4		327000	187000	204000	651000	649000	672000	952000	920000	993000	182000	161000	186000	557000	491000	506000	204000	174000	186000	291000	164000	159000	509000	501000	531000	817000	790000	870000	179000	161000	185000	453000	393000	408000	160000	147000	144000	0.37:0.21:0.20:0.64:0.63:0.67:1.03:1.00:1.10:0.23:0.20:0.23:0.57:0.50:0.52:0.20:0.19:0.18	667000	300000	565000	248000	1.00:0.44
448	665	ag|155025|Deer_XM_018044382.1	15.14	9	2	2	Carbamidomethylation	94500	110000	93300	97700	103000	102000	141000	153000	191000	23300	19600	21200	17100	21000	41900	102000	98300	94300	94500	110000	93300	97700	103000	102000	141000	153000	191000	23300	19600	21200	17100	21000	41900	102000	98300	94300	0.62:0.72:0.61:0.64:0.68:0.67:0.92:1.00:1.25:0.15:0.13:0.14:0.11:0.14:0.27:0.67:0.64:0.62	134000	70800	134000	70800	1.00:0.53
334	642	ag|148319|Deer_XM_018066211.1	14.57	15	3	3	Carbamidomethylation	130000	125000	164000	303000	155000	323000	444000	448000	448000	416000	614000	459000	1000000	481000	423000	692000	434000	447000	130000	125000	164000	303000	155000	323000	444000	448000	448000	416000	614000	459000	1000000	481000	423000	692000	434000	447000	0.29:0.28:0.37:0.68:0.35:0.72:0.99:1.00:1.00:0.93:1.37:1.02:2.23:1.07:0.94:1.54:0.97:1.00	318000	572000	318000	572000	1.00:1.80
334	643	ag|078007|CS60.230410CS6000131700057	14.57	14	3	3	Carbamidomethylation	130000	125000	164000	303000	155000	323000	444000	448000	448000	416000	614000	459000	1000000	481000	423000	692000	434000	447000	130000	125000	164000	303000	155000	323000	444000	448000	448000	416000	614000	459000	1000000	481000	423000	692000	434000	447000	0.29:0.28:0.37:0.68:0.35:0.72:0.99:1.00:1.00:0.93:1.37:1.02:2.23:1.07:0.94:1.54:0.97:1.00	318000	572000	318000	572000	1.00:1.80
256	468	ag|110089|CS60.230410CS6000072200001	14.24	14	3	3		342000	358000	339000	422000	464000	451000	624000	644000	664000	935000	930000	929000	1210000	1200000	1210000	560000	541000	517000	342000	358000	339000	422000	464000	451000	624000	644000	664000	935000	930000	929000	1210000	1200000	1210000	560000	541000	517000	0.53:0.56:0.53:0.66:0.72:0.70:0.97:1.00:1.03:1.45:1.44:1.44:1.87:1.86:1.87:0.87:0.84:0.80	479000	891000	479000	891000	1.00:1.86
380	730	ag|053558|140304CS1901922600001	13.77	16	2	2	Carbamidomethylation; Deamidation (NQ)	443000	382000	416000	228000	246000	273000	617000	625000	618000	84200	88900	94000	351000	346000	411000	173000	168000	163000	443000	382000	416000	228000	246000	273000	617000	625000	618000	84200	88900	94000	351000	346000	411000	173000	168000	163000	0.71:0.61:0.67:0.36:0.39:0.44:0.99:1.00:0.99:0.13:0.14:0.15:0.56:0.55:0.66:0.28:0.27:0.26	428000	229000	428000	229000	1.00:0.54
10	9	ag|042447|NODE_964889	12.3	48	53	10	Carbamidomethylation; Deamidation (NQ); Pyro-glu from Q; Hydroxylation; Replacement of 2 protons by calcium; Dihydroxy	4090000	4050000	3930000	5470000	5770000	5680000	5910000	5980000	6460000	3100000	3260000	3200000	19100000	18700000	18900000	5420000	5640000	5360000	1870000	1930000	1850000	2110000	2180000	2280000	2660000	2790000	2940000	1360000	1290000	1340000	7500000	7500000	7600000	2220000	2300000	2070000	0.67:0.69:0.66:0.76:0.78:0.82:0.95:1.00:1.06:0.49:0.46:0.48:2.69:2.69:2.72:0.80:0.82:0.74	5390000	9660000	2290000	4110000	1.00:1.80
262	504	ag|049619|140304CS1900100900001	11.98	24	3	3	Carbamidomethylation; Deamidation (NQ)	456000	346000	444000	221000	187000	504000	425000	551000	455000	470000	466000	470000	416000	460000	460000	1250000	2020000	1310000	456000	346000	444000	221000	151000	307000	376000	354000	455000	470000	466000	470000	329000	377000	384000	1250000	1370000	1310000	1.29:0.97:1.25:0.62:0.43:0.87:1.06:1.00:1.28:1.33:1.32:1.33:0.93:1.06:1.08:3.51:3.86:3.70	497000	967000	377000	741000	1.00:1.97
76	126	ag|038536|NODE_756522	11.78	44	11	10	Pyro-glu from Q	3920000	3690000	3880000	5350000	5690000	5860000	6120000	5620000	6670000	226000	132000	191000	4310000	4270000	4200000	5570000	4800000	4500000	2010000	2080000	1940000	2070000	2200000	2260000	2310000	2390000	2540000	189000	125000	134000	1800000	1770000	1790000	2220000	2200000	2170000	0.84:0.87:0.81:0.87:0.92:0.95:0.96:1.00:1.06:0.08:0.05:0.06:0.75:0.74:0.75:0.93:0.92:0.91	5200000	3970000	2200000	1720000	1.00:0.78
264	187	ag|153234|Deer_XM_018054045.1	11.73	8	4	1	Carbamidomethylation	81800	83500	72500	78900	83500	87400	105000	108000	110000	171000	197000	187000	292000	269000	257000	125000	118000	116000	81800	83500	72500	78900	83500	87400	105000	108000	110000	171000	197000	187000	292000	269000	257000	125000	118000	116000	0.75:0.77:0.67:0.73:0.77:0.81:0.97:1.00:1.01:1.58:1.82:1.73:2.70:2.49:2.37:1.16:1.09:1.07	90100	193000	90100	193000	1.00:2.14
264	188	ag|153235|Deer_XM_018054044.1	11.73	8	4	1	Carbamidomethylation	81800	83500	72500	78900	83500	87400	105000	108000	110000	171000	197000	187000	292000	269000	257000	125000	118000	116000	81800	83500	72500	78900	83500	87400	105000	108000	110000	171000	197000	187000	292000	269000	257000	125000	118000	116000	0.75:0.77:0.67:0.73:0.77:0.81:0.97:1.00:1.01:1.58:1.82:1.73:2.70:2.49:2.37:1.16:1.09:1.07	90100	193000	90100	193000	1.00:2.14
264	189	ag|153233|Deer_XM_018054046.1	11.73	8	4	1	Carbamidomethylation	81800	83500	72500	78900	83500	87400	105000	108000	110000	171000	197000	187000	292000	269000	257000	125000	118000	116000	81800	83500	72500	78900	83500	87400	105000	108000	110000	171000	197000	187000	292000	269000	257000	125000	118000	116000	0.75:0.77:0.67:0.73:0.77:0.81:0.97:1.00:1.01:1.58:1.82:1.73:2.70:2.49:2.37:1.16:1.09:1.07	90100	193000	90100	193000	1.00:2.14
669	2145	ag|142910|Deer_XM_018038568.1	11.66	2	1	1	Carbamidomethylation; Deamidation (NQ); Hydroxylation	441000	0	0	0	527000	0	0	0	0	1150000	1180000	1230000	391000	389000	387000	924000	856000	873000	441000	0	0	0	527000	0	0	0	0	1150000	1180000	1230000	391000	389000	387000	924000	856000	873000	64.00:-:-:-:64.00:-:-:-:-:64.00:64.00:64.00:64.00:64.00:64.00:64.00:64.00:64.00	484000	820000	484000	820000	1.00:1.69
669	2146	ag|170938|Deer_XM_012100471.2	11.66	2	1	1	Carbamidomethylation; Deamidation (NQ); Hydroxylation	441000	0	0	0	527000	0	0	0	0	1150000	1180000	1230000	391000	389000	387000	924000	856000	873000	441000	0	0	0	527000	0	0	0	0	1150000	1180000	1230000	391000	389000	387000	924000	856000	873000	64.00:-:-:-:64.00:-:-:-:-:64.00:64.00:64.00:64.00:64.00:64.00:64.00:64.00:64.00	484000	820000	484000	820000	1.00:1.69
406	224	ag|011950|NODE_1768711	11.49	2	1	1		180000	0	0	0	0	0	174000	159000	196000	0	19100	0	0	32800	33900	0	0	0	180000	0	0	0	0	0	174000	159000	196000	0	19100	0	0	32800	33900	0	0	0	1.13:0:0:0:0:0:1.10:1.00:1.23:0:0.12:0:0:0.21:0.21:0:0:0	177000	28600	177000	28600	1.00:0.16
124	85	ag|046313|140304CS1901623200001	10.81	20	11	11	Carbamidomethylation	661000	738000	739000	750000	773000	785000	1080000	989000	1000000	532000	532000	537000	2730000	2750000	2800000	983000	935000	974000	267000	265000	268000	244000	262000	287000	370000	384000	402000	163000	166000	158000	1100000	1060000	1150000	361000	335000	370000	0.70:0.69:0.70:0.64:0.68:0.75:0.96:1.00:1.05:0.43:0.43:0.41:2.87:2.76:3.00:0.94:0.87:0.96	971000	1640000	305000	656000	1.00:2.15
274	515	ag|006978|NODE_1460532	10.79	18	3	3	Carbamidomethylation	286000	300000	287000	299000	303000	324000	505000	501000	540000	654000	603000	638000	452000	282000	316000	872000	921000	920000	286000	300000	287000	299000	303000	324000	505000	501000	540000	654000	603000	638000	452000	282000	316000	872000	921000	920000	0.57:0.60:0.57:0.60:0.61:0.65:1.01:1.00:1.08:1.31:1.20:1.27:0.90:0.56:0.63:1.74:1.84:1.84	372000	629000	372000	629000	1.00:1.69
274	516	ag|067666|CS60.230410CS6000122300035	10.79	14	3	3	Carbamidomethylation	286000	300000	287000	299000	303000	324000	505000	501000	540000	654000	603000	638000	452000	282000	316000	872000	921000	920000	286000	300000	287000	299000	303000	324000	505000	501000	540000	654000	603000	638000	452000	282000	316000	872000	921000	920000	0.57:0.60:0.57:0.60:0.61:0.65:1.01:1.00:1.08:1.31:1.20:1.27:0.90:0.56:0.63:1.74:1.84:1.84	372000	629000	372000	629000	1.00:1.69
388	613	ag|051833|140304CS1901296900001	10.73	14	3	3	Carbamidomethylation	69500	68400	72700	185000	282000	207000	192000	186000	194000	391000	397000	396000	426000	414000	384000	69200	88000	126000	69500	68400	72700	185000	282000	207000	192000	186000	194000	391000	397000	396000	426000	414000	384000	69200	88000	126000	0.37:0.37:0.39:0.99:1.51:1.11:1.03:1.00:1.04:2.10:2.13:2.13:2.29:2.23:2.06:0.37:0.47:0.67	248000	341000	248000	341000	1.00:1.37
255	253	ag|110658|CS60.230410CS6000074100002	10.04	15	3	3	Carbamidomethylation	270000	276000	283000	361000	406000	407000	459000	473000	489000	62800	59400	58400	472000	452000	452000	160000	163000	159000	270000	276000	283000	361000	406000	407000	459000	473000	489000	62800	59400	58400	472000	452000	452000	160000	163000	159000	0.57:0.58:0.60:0.76:0.86:0.86:0.97:1.00:1.03:0.13:0.13:0.12:1.00:0.95:0.95:0.34:0.35:0.34	380000	340000	380000	340000	1.00:0.89
292	16985	tr|A0A212CSV2|A0A212CSV2_CEREH	9.96	26	7	3		869000	816000	865000	787000	817000	869000	1970000	1990000	1930000	108000	144000	109000	429000	453000	451000	1610000	1650000	1600000	869000	816000	865000	787000	817000	869000	1970000	1990000	1930000	108000	144000	109000	429000	453000	451000	1610000	1650000	1600000	0.44:0.41:0.44:0.40:0.41:0.44:0.99:1.00:0.97:0.05:0.07:0.05:0.22:0.23:0.23:0.81:0.83:0.81	1210000	1140000	1210000	1140000	1.00:0.94
364	901	ag|168646|Deer_NM_001285550.1	9.78	24	2	2		133000	136000	133000	306000	303000	291000	232000	199000	168000	69900	71300	68500	142000	145000	142000	115000	137000	160000	133000	136000	133000	306000	303000	291000	232000	199000	168000	69900	71300	68500	142000	145000	142000	115000	137000	160000	0.67:0.68:0.67:1.54:1.53:1.47:1.17:1.00:0.85:0.35:0.36:0.34:0.72:0.73:0.71:0.58:0.69:0.81	228000	117000	228000	117000	1.00:0.51
364	902	ag|133912|tr|V5LTF3|V5LTF3_CERNI	9.78	21	2	2		133000	136000	133000	306000	303000	291000	232000	199000	168000	69900	71300	68500	142000	145000	142000	115000	137000	160000	133000	136000	133000	306000	303000	291000	232000	199000	168000	69900	71300	68500	142000	145000	142000	115000	137000	160000	0.67:0.68:0.67:1.54:1.53:1.47:1.17:1.00:0.85:0.35:0.36:0.34:0.72:0.73:0.71:0.58:0.69:0.81	228000	117000	228000	117000	1.00:0.51
364	903	ag|050879|140304CS1901053900001	9.78	19	2	2		133000	136000	133000	306000	303000	291000	232000	199000	168000	69900	71300	68500	142000	145000	142000	115000	137000	160000	133000	136000	133000	306000	303000	291000	232000	199000	168000	69900	71300	68500	142000	145000	142000	115000	137000	160000	0.67:0.68:0.67:1.54:1.53:1.47:1.17:1.00:0.85:0.35:0.36:0.34:0.72:0.73:0.71:0.58:0.69:0.81	228000	117000	228000	117000	1.00:0.51
364	904	ag|108166|CS60.230410CS6000006500002	9.78	18	2	2		133000	136000	133000	306000	303000	291000	232000	199000	168000	69900	71300	68500	142000	145000	142000	115000	137000	160000	133000	136000	133000	306000	303000	291000	232000	199000	168000	69900	71300	68500	142000	145000	142000	115000	137000	160000	0.67:0.68:0.67:1.54:1.53:1.47:1.17:1.00:0.85:0.35:0.36:0.34:0.72:0.73:0.71:0.58:0.69:0.81	228000	117000	228000	117000	1.00:0.51
135	381	ag|100392|CS60.230410CS6000025900003	9.64	37	6	6	Carbamidomethylation; Pyro-glu from Q; Hydroxylation	283000	279000	473000	559000	627000	476000	385000	402000	554000	518000	509000	605000	1060000	1110000	914000	537000	616000	563000	127000	131000	308000	280000	325000	291000	342000	352000	383000	432000	452000	460000	646000	633000	611000	376000	486000	477000	0.36:0.37:0.88:0.80:0.92:0.83:0.97:1.00:1.09:1.23:1.28:1.31:1.84:1.80:1.74:1.07:1.38:1.35	555000	905000	282000	526000	1.00:1.86
97	101	ag|167582|Deer_NM_001081575.1	9.31	8	4	2		456000	461000	152000	44300	10700	9150	94500	22500	10700	308000	110000	281000	400000	828000	426000	478000	494000	464000	456000	461000	152000	44300	10700	9150	94500	22500	10700	308000	110000	281000	400000	828000	426000	478000	494000	464000	20.30:20.52:6.79:1.97:0.48:0.41:4.21:1.00:0.48:13.68:4.87:12.48:17.80:36.84:18.94:21.26:22.00:20.63	197000	440000	197000	440000	1.00:2.23
164	298	ag|100108|CS60.230410CS6000002400034	9.24	50	7	3		138000	195000	206000	327000	348000	349000	322000	336000	340000	396000	381000	164000	771000	758000	742000	394000	414000	427000	138000	195000	206000	327000	348000	349000	322000	336000	340000	396000	381000	164000	771000	758000	742000	394000	414000	427000	0.41:0.58:0.61:0.98:1.04:1.04:0.96:1.00:1.01:1.18:1.13:0.49:2.30:2.26:2.21:1.17:1.23:1.27	302000	587000	302000	587000	1.00:1.95
164	299	ag|100107|CS60.230410CS6000002400033	9.24	38	7	3		138000	195000	206000	327000	348000	349000	322000	336000	340000	396000	381000	164000	771000	758000	742000	394000	414000	427000	138000	195000	206000	327000	348000	349000	322000	336000	340000	396000	381000	164000	771000	758000	742000	394000	414000	427000	0.41:0.58:0.61:0.98:1.04:1.04:0.96:1.00:1.01:1.18:1.13:0.49:2.30:2.26:2.21:1.17:1.23:1.27	302000	587000	302000	587000	1.00:1.95
368	17007	tr|A0A212CIE6|A0A212CIE6_CEREH	9.07	34	2	2		231000	222000	246000	384000	414000	410000	562000	560000	590000	764000	786000	804000	939000	896000	897000	239000	561000	567000	231000	222000	246000	384000	414000	410000	562000	560000	590000	764000	786000	804000	939000	896000	897000	239000	561000	567000	0.41:0.40:0.44:0.69:0.74:0.73:1.00:1.00:1.05:1.36:1.40:1.43:1.68:1.60:1.60:0.43:1.00:1.01	402000	767000	402000	767000	1.00:1.91
57	122	ag|100111|CS60.230410CS6000024000001	9.06	44	10	2	Carbamidomethylation	2700000	2750000	2630000	2290000	2450000	2500000	3260000	3380000	3480000	5550000	5680000	5600000	2250000	2240000	2280000	4600000	4420000	4380000	2700000	2750000	2630000	2290000	2450000	2500000	3260000	3380000	3480000	5550000	5680000	5600000	2250000	2240000	2280000	4600000	4420000	4380000	0.80:0.81:0.78:0.68:0.72:0.74:0.96:1.00:1.03:1.64:1.68:1.66:0.67:0.66:0.68:1.36:1.31:1.30	2820000	4110000	2820000	4110000	1.00:1.46
219	246	ag|188346|Deer_XM_019983198.1	9.02	12	6	6	Carbamidomethylation	289000	292000	372000	434000	460000	544000	752000	790000	832000	460000	433000	420000	1530000	1490000	1510000	610000	568000	645000	281000	285000	291000	394000	419000	433000	519000	541000	571000	370000	341000	343000	1020000	1040000	1020000	553000	513000	503000	0.52:0.53:0.54:0.73:0.77:0.80:0.96:1.00:1.06:0.68:0.63:0.63:1.88:1.92:1.89:1.02:0.95:0.93	644000	1120000	415000	652000	1.00:1.57
219	247	ag|181741|Deer_XM_015106930.1	9.02	12	6	6	Carbamidomethylation	289000	292000	372000	434000	460000	544000	752000	790000	832000	460000	433000	420000	1530000	1490000	1510000	610000	568000	645000	281000	285000	291000	394000	419000	433000	519000	541000	571000	370000	341000	343000	1020000	1040000	1020000	553000	513000	503000	0.52:0.53:0.54:0.73:0.77:0.80:0.96:1.00:1.06:0.68:0.63:0.63:1.88:1.92:1.89:1.02:0.95:0.93	644000	1120000	415000	652000	1.00:1.57
219	248	ag|031960|NODE_438268	9.02	11	6	6	Carbamidomethylation	289000	292000	372000	434000	460000	544000	752000	790000	832000	460000	433000	420000	1530000	1490000	1510000	610000	568000	645000	281000	285000	291000	394000	419000	433000	519000	541000	571000	370000	341000	343000	1020000	1040000	1020000	553000	513000	503000	0.52:0.53:0.54:0.73:0.77:0.80:0.96:1.00:1.06:0.68:0.63:0.63:1.88:1.92:1.89:1.02:0.95:0.93	644000	1120000	415000	652000	1.00:1.57
5	8	ag|141628|Deer_XM_005678936.3	9.01	53	46	1	Carbamidomethylation; Deamidation (NQ); Hydroxylation; Sodium adduct; Formylation; 6 more	9790000	9860000	10100000	10500000	10400000	11400000	12200000	12300000	13100000	20000000	19800000	20000000	11400000	11500000	11700000	15300000	14900000	14400000	9790000	9860000	10100000	10500000	10400000	11400000	12200000	12300000	13100000	20000000	19800000	20000000	11400000	11500000	11700000	15300000	14900000	14400000	0.80:0.80:0.82:0.85:0.84:0.92:0.99:1.00:1.07:1.63:1.61:1.62:0.93:0.94:0.95:1.24:1.21:1.17	11100000	15400000	11100000	15400000	1.00:1.39
54	373	ag|133402|tr|Q4TU70|Q4TU70_CEREL	8.85	58	7	1	Amidination of lysines or N-terminal amines with methyl acetimidate; Oxidation (M)	2580000	2620000	2480000	0	0	0	1020000	1050000	1110000	14400000	14600000	14600000	709000	665000	664000	3470000	3410000	3340000	2580000	2620000	2480000	0	0	0	1020000	1050000	1110000	14400000	14600000	14600000	709000	665000	664000	3470000	3410000	3340000	2.44:2.49:2.35:0:0:0:0.97:1.00:1.05:13.63:13.84:13.88:0.67:0.63:0.63:3.29:3.23:3.16	1810000	6210000	1810000	6210000	1.00:3.43
141	303	ag|109852|CS60.230410CS600007130000A	8.85	46	7	7		1140000	1190000	1170000	962000	1080000	1110000	1550000	1610000	1490000	1510000	1380000	1630000	2500000	2290000	2250000	1730000	1760000	1750000	854000	891000	884000	565000	647000	692000	1090000	1130000	1000000	1180000	1080000	1280000	1820000	1600000	1590000	1290000	1260000	1220000	0.76:0.79:0.78:0.50:0.57:0.61:0.96:1.00:0.89:1.05:0.95:1.13:1.61:1.42:1.41:1.14:1.12:1.08	1290000	1980000	874000	1460000	1.00:1.67
254	464	ag|041856|NODE_952258	8.66	36	3	3		279000	291000	291000	421000	462000	439000	569000	588000	612000	303000	322000	300000	1150000	1120000	1140000	560000	1000000	507000	279000	291000	291000	421000	462000	439000	569000	588000	612000	303000	322000	300000	1150000	1120000	1140000	560000	1000000	507000	0.47:0.49:0.50:0.72:0.79:0.75:0.97:1.00:1.04:0.52:0.55:0.51:1.95:1.90:1.94:0.95:1.71:0.86	439000	804000	439000	804000	1.00:1.83
162	545	ag|106545|CS60.230410CS6000058800016	8.21	30	6	6		1040000	1120000	1020000	1690000	1820000	1870000	2430000	2510000	2510000	2820000	2880000	2840000	1600000	1580000	1610000	3540000	3600000	3540000	936000	990000	922000	1360000	1440000	1500000	1950000	2010000	2130000	2660000	2700000	2690000	1300000	1270000	1290000	3020000	3100000	2920000	0.47:0.49:0.46:0.68:0.72:0.75:0.97:1.00:1.06:1.32:1.34:1.34:0.65:0.63:0.64:1.50:1.54:1.45	1830000	2810000	1470000	2330000	1.00:1.58
582	2139	ag|177842|Deer_XM_015092209.1	8.1	1	1	1	Deamidation (NQ); Hydroxylation	916000	939000	895000	943000	994000	1020000	1310000	1350000	1380000	1310000	1310000	1320000	3720000	3690000	3700000	1140000	1130000	1100000	916000	939000	895000	943000	994000	1020000	1310000	1350000	1380000	1310000	1310000	1320000	3720000	3690000	3700000	1140000	1130000	1100000	0.68:0.70:0.67:0.70:0.74:0.76:0.97:1.00:1.03:0.97:0.97:0.98:2.76:2.74:2.75:0.85:0.84:0.82	1080000	2050000	1080000	2050000	1.00:1.89
582	2140	ag|179766|Deer_XM_012158408.2	8.1	1	1	1	Deamidation (NQ); Hydroxylation	916000	939000	895000	943000	994000	1020000	1310000	1350000	1380000	1310000	1310000	1320000	3720000	3690000	3700000	1140000	1130000	1100000	916000	939000	895000	943000	994000	1020000	1310000	1350000	1380000	1310000	1310000	1320000	3720000	3690000	3700000	1140000	1130000	1100000	0.68:0.70:0.67:0.70:0.74:0.76:0.97:1.00:1.03:0.97:0.97:0.98:2.76:2.74:2.75:0.85:0.84:0.82	1080000	2050000	1080000	2050000	1.00:1.89
426	1180	ag|189456|Deer_XM_019977414.1	7.9	27	2	1	Carbamidomethylation	0	0	0	0	0	0	163000	185000	206000	0	0	0	0	0	0	0	0	112000	0	0	0	0	0	0	163000	185000	206000	0	0	0	0	0	0	0	0	112000	0:0:0:0:0:0:0.88:1.00:1.11:0:0:0:0:0:0:0:0:0.60	185000	112000	185000	112000	1.00:0.61
151	249	ag|104297|CS60.230410CS6000048800001	7.87	28	8	6	Carbamidomethylation	836000	838000	788000	1460000	1480000	1610000	1450000	1430000	1560000	1150000	1190000	1170000	3270000	3140000	3180000	1160000	1130000	1090000	525000	547000	498000	996000	1050000	1050000	968000	977000	1040000	1020000	1090000	1070000	2070000	1990000	1990000	777000	760000	760000	0.54:0.56:0.51:1.02:1.07:1.08:0.99:1.00:1.06:1.05:1.12:1.10:2.11:2.03:2.04:0.80:0.78:0.78	1280000	1990000	850000	1280000	1.00:1.51
11	14	ag|140427|Deer_XM_018040719.1	7.8	42	56	2	Carbamidomethylation; Deamidation (NQ); Pyro-glu from Q	304000	311000	293000	295000	316000	325000	330000	336000	356000	598000	564000	588000	661000	664000	686000	492000	478000	464000	215000	217000	204000	213000	226000	234000	244000	253000	260000	598000	564000	588000	466000	458000	480000	394000	388000	373000	0.85:0.86:0.81:0.84:0.89:0.93:0.97:1.00:1.03:2.36:2.23:2.33:1.84:1.81:1.90:1.56:1.53:1.47	318000	626000	230000	479000	1.00:2.09
500	540	ag|135358|Deer_XM_018055244.1	7.69	5	1	1		57700	55900	50800	61600	65600	79300	120000	131000	150000	70400	71800	76600	51400	40600	44500	44700	46400	38900	57700	55900	50800	61600	65600	79300	120000	131000	150000	70400	71800	76600	51400	40600	44500	44700	46400	38900	0.44:0.43:0.39:0.47:0.50:0.61:0.92:1.00:1.15:0.54:0.55:0.59:0.39:0.31:0.34:0.34:0.36:0.30	85800	53900	85800	53900	1.00:0.63
118	146	ag|109404|CS60.230410CS600000070000C	7.67	22	7	5	Carbamidomethylation	449000	442000	406000	958000	996000	1030000	1000000	1010000	1070000	641000	701000	689000	541000	515000	498000	771000	657000	642000	381000	373000	337000	846000	865000	894000	734000	736000	779000	364000	413000	391000	469000	458000	438000	493000	390000	378000	0.52:0.51:0.46:1.15:1.18:1.21:1.00:1.00:1.06:0.50:0.56:0.53:0.64:0.62:0.60:0.67:0.53:0.51	836000	727000	661000	506000	1.00:0.77
263	268	ag|136766|Deer_XM_018050187.1	7.53	29	6	4	Carbamidomethylation	79300	120000	159000	414000	391000	414000	405000	437000	424000	344000	348000	308000	759000	758000	790000	286000	264000	219000	79300	76000	120000	339000	312000	334000	318000	344000	326000	315000	321000	282000	608000	605000	642000	234000	217000	219000	0.23:0.22:0.35:0.99:0.91:0.97:0.92:1.00:0.95:0.91:0.93:0.82:1.77:1.76:1.86:0.68:0.63:0.64	344000	473000	269000	394000	1.00:1.46
607	1585	ag|003384|NODE_1224558	7.49	13	1	1	Carbamidomethylation	17800	0	960	48600	10300	8330	6920	132000	8470	0	0	1620	8710	22100	13900	1650	0	0	17800	0	960	48600	10300	8330	6920	132000	8470	0	0	1620	8710	22100	13900	1650	0	0	0.13:0:0.02:0.37:0.08:0.06:0.05:1.00:0.06:0:0:0.02:0.07:0.17:0.10:0.02:0:0	29200	9590	29200	9590	1.00:0.33
607	1587	ag|144372|Deer_XM_018066902.1	7.49	8	1	1	Carbamidomethylation	17800	0	960	48600	10300	8330	6920	132000	8470	0	0	1620	8710	22100	13900	1650	0	0	17800	0	960	48600	10300	8330	6920	132000	8470	0	0	1620	8710	22100	13900	1650	0	0	0.13:0:0.02:0.37:0.08:0.06:0.05:1.00:0.06:0:0:0.02:0.07:0.17:0.10:0.02:0:0	29200	9590	29200	9590	1.00:0.33
607	1588	ag|141971|Deer_XM_018046921.1	7.49	6	1	1	Carbamidomethylation	17800	0	960	48600	10300	8330	6920	132000	8470	0	0	1620	8710	22100	13900	1650	0	0	17800	0	960	48600	10300	8330	6920	132000	8470	0	0	1620	8710	22100	13900	1650	0	0	0.13:0:0.02:0.37:0.08:0.06:0.05:1.00:0.06:0:0:0.02:0.07:0.17:0.10:0.02:0:0	29200	9590	29200	9590	1.00:0.33
607	1589	ag|041940|NODE_954021	7.49	3	1	1	Carbamidomethylation	17800	0	960	48600	10300	8330	6920	132000	8470	0	0	1620	8710	22100	13900	1650	0	0	17800	0	960	48600	10300	8330	6920	132000	8470	0	0	1620	8710	22100	13900	1650	0	0	0.13:0:0.02:0.37:0.08:0.06:0.05:1.00:0.06:0:0:0.02:0.07:0.17:0.10:0.02:0:0	29200	9590	29200	9590	1.00:0.33
43	33	ag|047347|140304CS1900113000001	7.41	57	20	4	Carbamidomethylation	1080000	1010000	1050000	1270000	1320000	1360000	1650000	1690000	1710000	1660000	1690000	1660000	3130000	3170000	3190000	977000	991000	829000	1080000	1010000	1050000	977000	1020000	1050000	1570000	1620000	1650000	1610000	1630000	1600000	2770000	2800000	2840000	899000	899000	829000	0.67:0.62:0.65:0.60:0.63:0.65:0.97:1.00:1.02:1.00:1.01:0.99:1.71:1.73:1.75:0.56:0.56:0.51	1410000	1940000	1230000	1760000	1.00:1.44
438	1106	ag|069953|CS60.230410CS600012460004F	6.95	13	1	1		81800	80800	88800	66800	58500	76500	97300	0	107000	73400	76900	90900	203000	188000	197000	185000	153000	176000	81800	80800	88800	66800	58500	76500	97300	0	107000	73400	76900	90900	203000	188000	197000	185000	153000	176000	64.00:64.00:64.00:64.00:64.00:64.00:64.00:-:64.00:64.00:64.00:64.00:64.00:64.00:64.00:64.00:64.00:64.00	82300	149000	82300	149000	1.00:1.82
438	1107	ag|041506|NODE_944392	6.95	10	1	1		81800	80800	88800	66800	58500	76500	97300	0	107000	73400	76900	90900	203000	188000	197000	185000	153000	176000	81800	80800	88800	66800	58500	76500	97300	0	107000	73400	76900	90900	203000	188000	197000	185000	153000	176000	64.00:64.00:64.00:64.00:64.00:64.00:64.00:-:64.00:64.00:64.00:64.00:64.00:64.00:64.00:64.00:64.00:64.00	82300	149000	82300	149000	1.00:1.82
417	887	ag|102740|CS60.230410CS600004040000A	6.66	5	1	1	Carbamidomethylation	0	0	0	83100	89300	0	159000	0	0	0	0	0	197000	211000	110000	0	0	0	0	0	0	83100	89300	0	159000	0	0	0	0	0	197000	211000	110000	0	0	0	-:-:-:64.00:64.00:-:64.00:-:-:-:-:-:64.00:64.00:64.00:-:-:-	110000	173000	110000	173000	1.00:1.56
299	528	ag|165282|Deer_XM_010813342.1	6.57	13	3	1	Deamidation (NQ); Methylation(others); Ubiquitin	59700	0	57200	0	0	0	0	0	0	0	0	0	157000	165000	150000	0	0	0	59700	0	57200	0	0	0	0	0	0	0	0	0	157000	165000	150000	0	0	0	64.00:-:64.00:-:-:-:-:-:-:-:-:-:64.00:64.00:64.00:-:-:-	58400	157000	58400	157000	1.00:2.69
232	164	ag|147692|Deer_XM_018059793.1	6.42	13	5	5		310000	193000	311000	381000	288000	402000	706000	587000	569000	462000	623000	506000	591000	831000	691000	446000	582000	564000	213000	122000	221000	304000	201000	325000	520000	415000	416000	344000	522000	379000	453000	717000	445000	391000	462000	441000	0.51:0.29:0.53:0.73:0.48:0.78:1.25:1.00:1.00:0.83:1.26:0.91:1.09:1.73:1.07:0.94:1.11:1.06	453000	648000	335000	505000	1.00:1.51
409	1008	ag|109205|CS60.230410CS600006940000D	6.32	11	2	2	Carbamidomethylation; Deamidation (NQ); Hydroxylation	101000	90800	99500	231000	250000	246000	327000	323000	296000	448000	409000	402000	310000	320000	307000	345000	370000	391000	101000	90800	99500	231000	250000	246000	327000	323000	296000	448000	409000	402000	310000	320000	307000	345000	370000	391000	0.31:0.28:0.31:0.71:0.78:0.76:1.01:1.00:0.92:1.39:1.27:1.25:0.96:0.99:0.95:1.07:1.15:1.21	218000	367000	218000	367000	1.00:1.68
379	1285	ag|177836|Deer_XM_012180232.2	6.3	15	2	2		321000	315000	306000	154000	170000	182000	260000	255000	219000	179000	181000	166000	701000	736000	699000	385000	323000	378000	321000	315000	306000	154000	170000	182000	260000	255000	219000	179000	181000	166000	701000	736000	699000	385000	323000	378000	1.26:1.24:1.20:0.61:0.67:0.72:1.02:1.00:0.86:0.70:0.71:0.65:2.75:2.89:2.75:1.51:1.27:1.49	242000	487000	242000	487000	1.00:2.01
379	1286	ag|000862|NODE_1048051	6.3	11	2	2		321000	315000	306000	154000	170000	182000	260000	255000	219000	179000	181000	166000	701000	736000	699000	385000	323000	378000	321000	315000	306000	154000	170000	182000	260000	255000	219000	179000	181000	166000	701000	736000	699000	385000	323000	378000	1.26:1.24:1.20:0.61:0.67:0.72:1.02:1.00:0.86:0.70:0.71:0.65:2.75:2.89:2.75:1.51:1.27:1.49	242000	487000	242000	487000	1.00:2.01
379	1287	ag|179191|Deer_XM_015090321.1	6.3	10	2	2		321000	315000	306000	154000	170000	182000	260000	255000	219000	179000	181000	166000	701000	736000	699000	385000	323000	378000	321000	315000	306000	154000	170000	182000	260000	255000	219000	179000	181000	166000	701000	736000	699000	385000	323000	378000	1.26:1.24:1.20:0.61:0.67:0.72:1.02:1.00:0.86:0.70:0.71:0.65:2.75:2.89:2.75:1.51:1.27:1.49	242000	487000	242000	487000	1.00:2.01
379	1288	ag|142951|Deer_XM_005696755.2	6.3	10	2	2		321000	315000	306000	154000	170000	182000	260000	255000	219000	179000	181000	166000	701000	736000	699000	385000	323000	378000	321000	315000	306000	154000	170000	182000	260000	255000	219000	179000	181000	166000	701000	736000	699000	385000	323000	378000	1.26:1.24:1.20:0.61:0.67:0.72:1.02:1.00:0.86:0.70:0.71:0.65:2.75:2.89:2.75:1.51:1.27:1.49	242000	487000	242000	487000	1.00:2.01
379	1289	ag|102476|CS60.230410CS6000003900003	6.3	9	2	2		321000	315000	306000	154000	170000	182000	260000	255000	219000	179000	181000	166000	701000	736000	699000	385000	323000	378000	321000	315000	306000	154000	170000	182000	260000	255000	219000	179000	181000	166000	701000	736000	699000	385000	323000	378000	1.26:1.24:1.20:0.61:0.67:0.72:1.02:1.00:0.86:0.70:0.71:0.65:2.75:2.89:2.75:1.51:1.27:1.49	242000	487000	242000	487000	1.00:2.01
379	1291	ag|135936|Deer_XM_005682056.3	6.3	6	2	2		321000	315000	306000	154000	170000	182000	260000	255000	219000	179000	181000	166000	701000	736000	699000	385000	323000	378000	321000	315000	306000	154000	170000	182000	260000	255000	219000	179000	181000	166000	701000	736000	699000	385000	323000	378000	1.26:1.24:1.20:0.61:0.67:0.72:1.02:1.00:0.86:0.70:0.71:0.65:2.75:2.89:2.75:1.51:1.27:1.49	242000	487000	242000	487000	1.00:2.01
471	556	ag|137419|Deer_XM_018052143.1	6.26	3	2	2		9610	9810	12800	32200	8350	30900	33000	39100	30300	12000	15700	24300	83100	71700	22700	46200	8730	44400	9610	9810	12800	32200	8350	30900	33000	39100	30300	12000	15700	24300	83100	71700	22700	46200	8730	44400	0.25:0.25:0.33:0.82:0.21:0.79:0.84:1.00:0.78:0.31:0.40:0.62:2.13:1.84:0.58:1.18:0.22:1.14	25000	44700	25000	44700	1.00:1.79
353	873	ag|046611|140304CS1900951600001	6.21	12	1	1	Hydroxylation	1090000	1020000	1080000	1270000	941000	1060000	740000	773000	761000	300000	284000	292000	294000	310000	280000	381000	431000	895000	1090000	1020000	1080000	1270000	941000	1060000	740000	773000	761000	300000	284000	292000	294000	310000	280000	381000	431000	895000	1.41:1.32:1.39:1.64:1.22:1.37:0.96:1.00:0.98:0.39:0.37:0.38:0.38:0.40:0.36:0.49:0.56:1.16	970000	385000	970000	385000	1.00:0.40
532	1140	ag|049525|140304CS1901704800001	6.19	11	1	1		8590	6250	11500	191000	33000	19400	21900	68000	84500	5320	9040	9100	64300	59300	60100	9550	0	6400	8590	6250	11500	191000	33000	19400	21900	68000	84500	5320	9040	9100	64300	59300	60100	9550	0	6400	0.13:0.09:0.17:2.81:0.49:0.28:0.32:1.00:1.24:0.08:0.13:0.13:0.95:0.87:0.88:0.14:0:0.09	49400	27900	49400	27900	1.00:0.56
227	16962	tr|L8J4S1|L8J4S1_9CETA	6.07	15	20	1	Carbamidomethylation; Pyro-glu from Q	38700	34600	36300	43300	43000	44700	85900	93700	101000	97800	101000	96500	146000	146000	145000	59700	57600	61100	38700	34600	36300	43300	43000	44700	85900	93700	101000	97800	101000	96500	146000	146000	145000	59700	57600	61100	0.41:0.37:0.39:0.46:0.46:0.48:0.92:1.00:1.08:1.04:1.07:1.03:1.56:1.55:1.55:0.64:0.62:0.65	57900	101000	57900	101000	1.00:1.75
529	413	ag|137418|Deer_XM_018052143.1	6.05	2	1	1		0	0	2850	21700	14200	28600	19600	30700	18900	11100	12100	11200	57000	52900	48600	29000	24900	25700	0	0	2850	21700	14200	28600	19600	30700	18900	11100	12100	11200	57000	52900	48600	29000	24900	25700	0:0:0.09:0.71:0.46:0.93:0.64:1.00:0.61:0.36:0.39:0.36:1.86:1.72:1.58:0.94:0.81:0.84	19500	30300	19500	30300	1.00:1.55
529	414	ag|137420|Deer_XM_018052141.1	6.05	2	1	1		0	0	2850	21700	14200	28600	19600	30700	18900	11100	12100	11200	57000	52900	48600	29000	24900	25700	0	0	2850	21700	14200	28600	19600	30700	18900	11100	12100	11200	57000	52900	48600	29000	24900	25700	0:0:0.09:0.71:0.46:0.93:0.64:1.00:0.61:0.36:0.39:0.36:1.86:1.72:1.58:0.94:0.81:0.84	19500	30300	19500	30300	1.00:1.55
231	143	ag|019285|NODE_2205221	5.97	16	5	5	Methylation(others); Ubiquitin	334000	342000	426000	326000	349000	310000	347000	387000	440000	535000	450000	380000	917000	820000	844000	249000	251000	247000	220000	220000	320000	261000	277000	240000	257000	293000	344000	383000	450000	321000	737000	633000	656000	193000	197000	200000	0.75:0.75:1.09:0.89:0.94:0.82:0.88:1.00:1.17:1.31:1.53:1.09:2.51:2.16:2.24:0.66:0.67:0.68	385000	556000	293000	432000	1.00:1.48
231	144	ag|053963|140304CS1901050100001	5.97	15	5	5	Methylation(others); Ubiquitin	334000	342000	426000	326000	349000	310000	347000	387000	440000	535000	450000	380000	917000	820000	844000	249000	251000	247000	220000	220000	320000	261000	277000	240000	257000	293000	344000	383000	450000	321000	737000	633000	656000	193000	197000	200000	0.75:0.75:1.09:0.89:0.94:0.82:0.88:1.00:1.17:1.31:1.53:1.09:2.51:2.16:2.24:0.66:0.67:0.68	385000	556000	293000	432000	1.00:1.48
361	591	ag|049276|140304CS1900108500001	5.95	10	3	3	Carbamidomethylation	150000	157000	140000	212000	221000	226000	354000	355000	377000	373000	445000	425000	411000	405000	384000	232000	225000	220000	150000	157000	140000	212000	221000	226000	354000	355000	377000	373000	445000	425000	411000	405000	384000	232000	225000	220000	0.42:0.44:0.40:0.60:0.62:0.64:1.00:1.00:1.06:1.05:1.25:1.20:1.16:1.14:1.08:0.65:0.63:0.62	244000	356000	244000	356000	1.00:1.46
586	991	ag|110215|CS60.230410CS6000072600008	5.78	4	1	1		25100	22900	24800	50300	55900	55000	55900	58200	58900	35100	36100	35100	129000	118000	121000	39300	37500	31600	25100	22900	24800	50300	55900	55000	55900	58200	58900	35100	36100	35100	129000	118000	121000	39300	37500	31600	0.43:0.39:0.43:0.86:0.96:0.94:0.96:1.00:1.01:0.60:0.62:0.60:2.21:2.02:2.08:0.67:0.64:0.54	45200	64700	45200	64700	1.00:1.43
32	50	ag|165662|Deer_XM_005203621.1	5.69	35	20	7	Carbamidomethylation; Deamidation (NQ); Amidination of lysines or N-terminal amines with methyl acetimidate; Dihydroxy	1810000	1910000	1670000	2070000	2210000	2300000	2870000	2890000	2990000	3200000	3010000	3040000	3900000	4040000	3910000	2370000	2390000	1590000	1260000	1390000	1220000	1390000	1500000	1550000	1930000	1990000	2070000	2160000	2110000	2160000	2940000	2860000	2940000	1650000	1640000	802000	0.63:0.70:0.61:0.70:0.75:0.78:0.97:1.00:1.04:1.09:1.06:1.09:1.48:1.44:1.48:0.83:0.82:0.40	2330000	3220000	1590000	2260000	1.00:1.42
122	40	ag|021572|NODE_2345349	5.6	10	4	1		54600	58000	54200	53200	57700	59400	81800	81200	107000	208000	209000	203000	405000	405000	415000	72400	75300	74500	54600	58000	54200	53200	57700	59400	81800	81200	107000	208000	209000	203000	405000	405000	415000	72400	75300	74500	0.67:0.71:0.67:0.65:0.71:0.73:1.01:1.00:1.32:2.57:2.57:2.50:4.99:4.99:5.11:0.89:0.93:0.92	67400	230000	67400	230000	1.00:3.41
99	394	ag|052143|140304CS1900001300001	5.57	50	6	6	Carbamidomethylation; Acetylation (N-term)	3020000	2920000	3040000	4850000	5100000	5220000	6070000	6260000	6460000	2610000	2700000	2620000	9900000	9900000	9840000	5360000	5250000	5100000	2120000	2000000	2150000	3220000	3410000	3490000	4330000	4500000	4630000	2580000	2670000	2570000	7090000	7060000	6970000	3960000	3890000	3780000	0.47:0.44:0.48:0.72:0.76:0.78:0.96:1.00:1.03:0.57:0.59:0.57:1.58:1.57:1.55:0.88:0.87:0.84	4800000	6200000	3320000	4510000	1.00:1.36
99	395	ag|101126|CS60.230410CS6000030100001	5.57	47	6	6	Carbamidomethylation; Acetylation (N-term)	3020000	2920000	3040000	4850000	5100000	5220000	6070000	6260000	6460000	2610000	2700000	2620000	9900000	9900000	9840000	5360000	5250000	5100000	2120000	2000000	2150000	3220000	3410000	3490000	4330000	4500000	4630000	2580000	2670000	2570000	7090000	7060000	6970000	3960000	3890000	3780000	0.47:0.44:0.48:0.72:0.76:0.78:0.96:1.00:1.03:0.57:0.59:0.57:1.58:1.57:1.55:0.88:0.87:0.84	4800000	6200000	3320000	4510000	1.00:1.36
616	1322	ag|135929|Deer_XM_005682038.2	5.55	5	1	1		7080	5720	4250	27200	37700	30100	44300	23700	22800	7860	8480	4810	61000	75100	83000	24800	16400	15600	7080	5720	4250	27200	37700	30100	44300	23700	22800	7860	8480	4810	61000	75100	83000	24800	16400	15600	0.30:0.24:0.18:1.15:1.59:1.27:1.87:1.00:0.97:0.33:0.36:0.20:2.58:3.17:3.51:1.05:0.69:0.66	22500	33000	22500	33000	1.00:1.46
616	1323	ag|104664|CS60.230410CS600005050000E	5.55	5	1	1		7080	5720	4250	27200	37700	30100	44300	23700	22800	7860	8480	4810	61000	75100	83000	24800	16400	15600	7080	5720	4250	27200	37700	30100	44300	23700	22800	7860	8480	4810	61000	75100	83000	24800	16400	15600	0.30:0.24:0.18:1.15:1.59:1.27:1.87:1.00:0.97:0.33:0.36:0.20:2.58:3.17:3.51:1.05:0.69:0.66	22500	33000	22500	33000	1.00:1.46
280	400	ag|109549|CS60.230410CS600007020001E	5.39	18	3	3	Carbamidomethylation	284000	281000	284000	179000	194000	171000	328000	362000	385000	136000	96300	96800	237000	324000	205000	213000	203000	200000	284000	281000	284000	179000	194000	171000	328000	362000	385000	136000	96300	96800	237000	324000	205000	213000	203000	200000	0.78:0.78:0.78:0.49:0.54:0.47:0.91:1.00:1.07:0.38:0.27:0.27:0.66:0.90:0.57:0.59:0.56:0.55	278000	211000	278000	211000	1.00:0.76
17	22	ag|021555|NODE_2344671	5.34	31	39	14	Carbamidomethylation; Hydroxylation	3380000	3390000	3380000	4500000	4830000	4660000	5000000	5090000	4970000	3030000	3140000	2860000	3700000	3800000	3720000	3410000	3400000	3340000	1170000	1220000	1120000	1350000	1430000	1460000	1730000	1820000	1740000	908000	954000	647000	1260000	1250000	1290000	1120000	1130000	1030000	0.64:0.67:0.62:0.74:0.78:0.80:0.95:1.00:0.96:0.50:0.52:0.36:0.69:0.68:0.71:0.61:0.62:0.56	4470000	3750000	1450000	1100000	1.00:0.76
208	785	ag|177794|Deer_XM_004002526.3	5.33	20	4	4	Carbamidomethylation	2930000	3000000	2830000	2550000	2680000	2770000	2590000	2570000	2550000	167000	129000	132000	2840000	2870000	2780000	3150000	3260000	3310000	2870000	2960000	2790000	2460000	2580000	2690000	2510000	2470000	2490000	167000	129000	132000	2740000	2780000	2690000	3030000	3120000	3210000	1.16:1.20:1.13:0.99:1.04:1.09:1.02:1.00:1.01:0.07:0.05:0.05:1.11:1.12:1.09:1.23:1.26:1.30	2720000	2110000	2650000	2000000	1.00:0.76
167	250	ag|109021|CS60.230410CS6000068800015	5.3	20	5	2	Carbamidomethylation	108000	144000	149000	60100	165000	226000	245000	173000	247000	171000	201000	157000	450000	407000	359000	155000	150000	139000	108000	144000	149000	60100	165000	226000	245000	173000	247000	171000	201000	157000	450000	407000	359000	155000	150000	139000	0.62:0.83:0.86:0.35:0.95:1.31:1.42:1.00:1.43:0.99:1.16:0.91:2.60:2.35:2.07:0.90:0.87:0.80	175000	243000	175000	243000	1.00:1.39
121	229	ag|100564|CS60.230410CS6000027100001	5.29	36	8	6	Carbamidomethylation	552000	551000	516000	609000	849000	912000	753000	896000	870000	797000	784000	847000	1190000	1320000	1150000	634000	765000	777000	465000	481000	420000	296000	519000	558000	634000	715000	722000	696000	675000	734000	869000	937000	796000	554000	561000	597000	0.65:0.67:0.59:0.41:0.73:0.78:0.89:1.00:1.01:0.97:0.94:1.03:1.22:1.31:1.11:0.77:0.78:0.83	752000	930000	551000	713000	1.00:1.29
400	787	ag|149595|Deer_XM_018060496.1	5.18	6	2	2	Carbamidomethylation	168000	46800	167000	24500	142000	155000	225000	194000	164000	45200	39900	49300	133000	38700	143000	94700	123000	133000	168000	46800	167000	24500	142000	155000	225000	194000	164000	45200	39900	49300	133000	38700	143000	94700	123000	133000	0.87:0.24:0.86:0.13:0.73:0.80:1.16:1.00:0.85:0.23:0.21:0.25:0.68:0.20:0.74:0.49:0.63:0.68	143000	128000	143000	128000	1.00:0.90
580	1276	ag|047476|140304CS1901011600001	5.17	5	1	1	Carbamidomethylation	100000	83100	95300	82200	76200	131000	146000	148000	154000	0	0	0	151000	90700	122000	55900	51200	63900	100000	83100	95300	82200	76200	131000	146000	148000	154000	0	0	0	151000	90700	122000	55900	51200	63900	0.68:0.56:0.64:0.56:0.51:0.89:0.99:1.00:1.04:0:0:0:1.02:0.61:0.82:0.38:0.35:0.43	113000	89100	113000	89100	1.00:0.79
580	1277	ag|109122|CS60.230410CS600006910001F	5.17	5	1	1	Carbamidomethylation	100000	83100	95300	82200	76200	131000	146000	148000	154000	0	0	0	151000	90700	122000	55900	51200	63900	100000	83100	95300	82200	76200	131000	146000	148000	154000	0	0	0	151000	90700	122000	55900	51200	63900	0.68:0.56:0.64:0.56:0.51:0.89:0.99:1.00:1.04:0:0:0:1.02:0.61:0.82:0.38:0.35:0.43	113000	89100	113000	89100	1.00:0.79
204	163	ag|046032|140304CS1901073300001	5.11	15	7	7	Carbamidomethylation; Hydroxylation	726000	832000	942000	864000	982000	946000	1060000	988000	1140000	528000	549000	440000	924000	682000	1190000	613000	646000	640000	432000	385000	663000	577000	688000	633000	689000	749000	743000	402000	413000	304000	334000	313000	605000	439000	497000	480000	0.58:0.51:0.88:0.77:0.92:0.85:0.92:1.00:0.99:0.54:0.55:0.41:0.45:0.42:0.81:0.59:0.66:0.64	988000	849000	618000	481000	1.00:0.78
543	693	ag|028723|NODE_2633933	5	2	1	1		0	8690	5920	14800	13400	14300	7800	11500	10100	36100	0	0	33300	28900	35100	23600	23500	21300	0	8690	5920	14800	13400	14300	7800	11500	10100	36100	0	0	33300	28900	35100	23600	23500	21300	0:0.75:0.51:1.29:1.17:1.24:0.68:1.00:0.88:3.13:0:0:2.89:2.51:3.05:2.05:2.04:1.85	10800	28800	10800	28800	1.00:2.66
62	80	ag|009628|NODE_162697	4.95	41	11	2	Carbamidomethylation; Deamidation (NQ)	491000	469000	440000	726000	785000	733000	731000	548000	709000	496000	519000	501000	223000	171000	163000	558000	511000	463000	245000	253000	234000	361000	391000	214000	339000	188000	311000	28300	20000	22900	86500	82900	77400	226000	175000	140000	1.30:1.34:1.25:1.92:2.08:1.14:1.81:1.00:1.66:0.15:0.11:0.12:0.46:0.44:0.41:1.20:0.93:0.75	656000	532000	312000	168000	1.00:0.54
467	1020	ag|106215|CS60.230410CS600005770001D	4.66	17	2	2	Carbamidomethylation	32200	33400	38300	104000	97600	40600	157000	56400	210000	105000	108000	102000	223000	103000	244000	168000	132000	156000	32200	33400	38300	104000	97600	40600	157000	56400	210000	105000	108000	102000	223000	103000	244000	168000	132000	156000	0.57:0.59:0.68:1.84:1.73:0.72:2.77:1.00:3.72:1.86:1.92:1.81:3.96:1.82:4.33:2.98:2.35:2.77	134000	190000	134000	190000	1.00:1.42
627	2022	ag|190086|Deer_XM_019972403.1	4.66	2	1	1		1050	0	0	16600	0	1480	0	103000	118000	70000	81400	83000	0	199000	0	96100	91900	89400	1050	0	0	16600	0	1480	0	103000	118000	70000	81400	83000	0	199000	0	96100	91900	89400	0.02:0:0:0.16:0:0.02:0:1.00:1.15:0.68:0.79:0.81:0:1.94:0:0.93:0.89:0.87	48100	102000	48100	102000	1.00:2.11
23	151	ag|053110|140304CS1901253300001	4.65	42	12	12	Carbamidomethylation; Deamidation (NQ); Amidination of lysines or N-terminal amines with methyl acetimidate	16400000	16100000	16300000	26100000	29900000	28500000	33500000	36400000	36200000	22900000	23600000	23000000	29700000	29000000	28600000	29500000	29700000	28800000	8440000	8100000	8350000	12200000	12800000	13200000	17400000	18000000	18900000	17200000	18100000	18200000	15100000	14900000	14800000	15700000	15900000	15500000	0.47:0.45:0.46:0.68:0.71:0.73:0.96:1.00:1.05:0.96:1.00:1.01:0.84:0.82:0.82:0.87:0.88:0.86	28800000	29000000	13100000	16200000	1.00:1.24
243	184	ag|031741|NODE_42247	4.63	14	5	3	Carbamidomethylation	341000	297000	299000	373000	371000	380000	411000	475000	460000	0	0	16300	642000	669000	680000	142000	257000	105000	341000	297000	299000	373000	371000	380000	411000	475000	460000	0	0	16300	642000	669000	680000	142000	257000	105000	0.72:0.62:0.63:0.78:0.78:0.80:0.87:1.00:0.97:0:0:0.03:1.35:1.41:1.43:0.30:0.54:0.22	379000	418000	379000	418000	1.00:1.11
521	1607	ag|046431|140304CS1901825000001	4.59	11	1	1		0	0	0	0	19900	0	17100	14000	18400	0	0	0	0	19100	0	0	0	0	0	0	0	0	19900	0	17100	14000	18400	0	0	0	0	19100	0	0	0	0	0:0:0:0:1.42:0:1.23:1.00:1.32:0:0:0:0:1.36:0:0:0:0	17300	19100	17300	19100	1.00:1.10
521	1608	ag|149672|Deer_XM_013970231.2	4.59	9	1	1		0	0	0	0	19900	0	17100	14000	18400	0	0	0	0	19100	0	0	0	0	0	0	0	0	19900	0	17100	14000	18400	0	0	0	0	19100	0	0	0	0	0:0:0:0:1.42:0:1.23:1.00:1.32:0:0:0:0:1.36:0:0:0:0	17300	19100	17300	19100	1.00:1.10
77	115	ag|044204|140304CS1901062800001	4.55	28	12	9	Carbamidomethylation	970000	932000	1070000	1970000	1880000	2060000	1180000	1240000	1130000	767000	802000	728000	2020000	2110000	1980000	820000	922000	963000	236000	145000	306000	1030000	1090000	1130000	613000	655000	443000	709000	784000	701000	1090000	1130000	1080000	614000	644000	577000	0.36:0.22:0.47:1.58:1.66:1.73:0.94:1.00:0.68:1.08:1.20:1.07:1.66:1.73:1.66:0.94:0.98:0.88	1470000	1460000	677000	897000	1.00:1.33
149	124	ag|166624|Deer_NM_001314303.1	4.45	13	7	1		57300	34500	67100	102000	85600	110000	116000	92000	114000	12600	16200	7020	104000	90700	108000	90400	53400	90400	57300	34500	67100	102000	85600	110000	116000	92000	114000	12600	16200	7020	104000	90700	108000	90400	53400	90400	0.62:0.38:0.73:1.11:0.93:1.20:1.26:1.00:1.24:0.14:0.18:0.08:1.13:0.99:1.17:0.98:0.58:0.98	86500	63700	86500	63700	1.00:0.74
174	367	ag|053965|140304CS1901051900001	4.42	38	7	7	Carbamidomethylation; Deamidation (NQ); Pyro-glu from Q	1240000	1230000	1210000	1920000	2000000	2150000	2460000	2580000	2680000	2110000	2140000	2100000	2370000	2310000	2400000	2330000	2240000	2210000	927000	932000	862000	1230000	1310000	1390000	1800000	1840000	1990000	1790000	1790000	1770000	1630000	1590000	1660000	1640000	1570000	1550000	0.50:0.51:0.47:0.67:0.71:0.76:0.98:1.00:1.08:0.97:0.97:0.96:0.88:0.86:0.90:0.89:0.85:0.84	1950000	2400000	1360000	1780000	1.00:1.30
12	31	ag|050760|140304CS1900110600001	4.42	54	30	28	Carbamidomethylation; Deamidation (NQ); Pyro-glu from Q; Formylation; 2-amino-3-oxo-butanoic_acid; 2 more	32300000	35000000	31600000	38600000	40900000	42400000	53200000	55100000	61700000	40900000	41600000	40400000	70400000	70600000	69800000	50800000	54200000	48400000	10100000	13200000	9700000	10500000	11000000	11400000	14900000	15500000	20600000	12800000	12700000	12800000	19800000	19500000	19900000	14800000	18500000	13900000	0.65:0.85:0.63:0.68:0.71:0.74:0.96:1.00:1.33:0.82:0.82:0.83:1.28:1.26:1.29:0.95:1.20:0.90	46400000	56200000	15900000	17700000	1.00:1.12
279	272	ag|053292|140304CS1901620100001	4.38	10	3	2		40900	17300	54800	192000	204000	211000	208000	242000	241000	144000	144000	156000	129000	97200	103000	90800	114000	88900	40900	17300	54800	192000	204000	211000	208000	242000	241000	144000	144000	156000	129000	97200	103000	90800	114000	88900	0.17:0.07:0.23:0.79:0.84:0.87:0.86:1.00:1.00:0.60:0.60:0.65:0.53:0.40:0.43:0.38:0.47:0.37	165000	119000	165000	119000	1.00:0.72
83	970	ag|052374|140304CS19010096FFFCB	4.36	34	2	1	Deamidation (NQ); Hydroxylation	727000	686000	695000	608000	639000	586000	701000	720000	743000	0	0	0	0	0	656000	779000	799000	0	727000	686000	695000	608000	639000	586000	701000	720000	743000	0	0	0	0	0	656000	779000	799000	0	1.01:0.95:0.97:0.85:0.89:0.81:0.97:1.00:1.03:0:0:0:0:0:0.91:1.08:1.11:0	678000	744000	678000	744000	1.00:1.10
137	283	ag|099711|CS60.230410CS6000021200013	4.32	46	7	3		869000	830000	867000	1240000	1300000	1340000	1130000	1170000	1170000	1370000	1390000	1410000	1820000	1810000	1770000	1350000	1120000	1370000	869000	830000	867000	1240000	1300000	1340000	1130000	1170000	1170000	1370000	1390000	1410000	1820000	1810000	1770000	1350000	1120000	1370000	0.74:0.71:0.74:1.07:1.12:1.15:0.97:1.00:1.01:1.17:1.19:1.20:1.56:1.55:1.51:1.16:0.96:1.17	1100000	1490000	1100000	1490000	1.00:1.35
53	117	ag|103580|CS60.230410CS6000045200006	4.26	46	14	14	Carbamidomethylation	6290000	6130000	6100000	11500000	12300000	12800000	13500000	13800000	14400000	3330000	3390000	3410000	11700000	11800000	11700000	10400000	10700000	10600000	3490000	3640000	3420000	5420000	5750000	5950000	7190000	7400000	7780000	1170000	1250000	1250000	6450000	6340000	6420000	5490000	5390000	5320000	0.47:0.49:0.46:0.73:0.78:0.80:0.97:1.00:1.05:0.16:0.17:0.17:0.87:0.86:0.87:0.74:0.73:0.72	11100000	9540000	5560000	4880000	1.00:0.88
294	657	ag|168505|Deer_NM_001037469.2	4.23	34	4	4	Pyro-glu from Q	978000	987000	923000	277000	280000	294000	210000	209000	232000	332000	299000	297000	1370000	1350000	1360000	344000	355000	398000	971000	986000	917000	223000	226000	235000	205000	203000	221000	332000	299000	297000	1270000	1250000	1270000	344000	322000	375000	4.79:4.86:4.52:1.10:1.11:1.16:1.01:1.00:1.09:1.64:1.48:1.47:6.26:6.17:6.28:1.69:1.59:1.85	488000	765000	465000	695000	1.00:1.49
294	658	ag|171013|Deer_XM_004019074.3	4.23	31	4	4	Pyro-glu from Q	978000	987000	923000	277000	280000	294000	210000	209000	232000	332000	299000	297000	1370000	1350000	1360000	344000	355000	398000	971000	986000	917000	223000	226000	235000	205000	203000	221000	332000	299000	297000	1270000	1250000	1270000	344000	322000	375000	4.79:4.86:4.52:1.10:1.11:1.16:1.01:1.00:1.09:1.64:1.48:1.47:6.26:6.17:6.28:1.69:1.59:1.85	488000	765000	465000	695000	1.00:1.49
117	385	ag|113748|CS60.230410CS6000084200018	4.14	35	6	4	Carbamidomethylation	640000	462000	613000	1850000	1950000	1910000	3200000	3390000	3510000	1610000	1720000	1720000	1640000	1630000	1580000	4470000	4120000	4190000	586000	437000	577000	1630000	1740000	1700000	2790000	2950000	3060000	1470000	1570000	1540000	1470000	1450000	1400000	3700000	3600000	3680000	0.20:0.15:0.20:0.55:0.59:0.58:0.95:1.00:1.04:0.50:0.53:0.52:0.50:0.49:0.48:1.25:1.22:1.25	1990000	2520000	1760000	2210000	1.00:1.25
49	34	ag|101511|CS60.230410CS6000032900007	4.14	51	19	3	Carbamidomethylation	427000	342000	375000	812000	420000	374000	873000	872000	885000	220000	515000	516000	440000	784000	401000	434000	148000	423000	427000	342000	375000	812000	420000	374000	873000	872000	885000	220000	515000	516000	440000	784000	401000	434000	148000	423000	0.49:0.39:0.43:0.93:0.48:0.43:1.00:1.00:1.01:0.25:0.59:0.59:0.50:0.90:0.46:0.50:0.17:0.49	620000	567000	620000	567000	1.00:0.91
131	281	ag|050466|140304CS1901043600001	4.07	16	8	8	Deamidation (NQ); Hydroxylation; 2-amino-3-oxo-butanoic_acid; Dihydroxy; Deoxy	2280000	2410000	2260000	3090000	3250000	3470000	2920000	2960000	3160000	2520000	2440000	2420000	3870000	3870000	3920000	3020000	2710000	2670000	918000	968000	920000	1070000	1120000	1190000	1250000	1260000	1290000	1440000	1360000	1370000	1750000	1750000	1750000	1110000	1150000	1120000	0.73:0.77:0.73:0.85:0.89:0.94:0.99:1.00:1.02:1.14:1.08:1.09:1.39:1.39:1.39:0.88:0.91:0.89	3100000	3430000	1110000	1420000	1.00:1.28
302	724	ag|109401|CS60.230410CS6000000700009	4.06	42	4	3	Carbamidomethylation; Hexose (NSY)	1550000	1330000	1710000	1880000	2040000	2040000	2560000	3150000	3120000	667000	9160	732000	1870000	1860000	1920000	2540000	2420000	2320000	1440000	1220000	1600000	1820000	1970000	1980000	2420000	3010000	2950000	667000	9160	732000	1820000	1800000	1870000	2410000	2300000	2200000	0.48:0.41:0.53:0.61:0.66:0.66:0.80:1.00:0.98:0.22:0.02:0.24:0.60:0.60:0.62:0.80:0.76:0.73	2150000	1700000	2050000	1610000	1.00:0.79
484	1297	ag|033852|NODE_592532	3.99	5	1	1	Hydroxylation	311000	17500	0	305000	2020	273000	263000	280000	0	0	0	0	273000	0	285000	0	0	0	311000	17500	0	305000	2020	273000	263000	280000	0	0	0	0	273000	0	285000	0	0	0	1.11:0.06:0:1.09:0.02:0.98:0.94:1.00:0:0:0:0:0.98:0:1.02:0:0:0	207000	279000	207000	279000	1.00:1.35
111	291	ag|104160|CS60.230410CS6000048100008	3.98	25	9	4	Acetylation (N-term); Dehydration; Dihydroxy	582000	568000	552000	658000	694000	754000	866000	836000	907000	380000	415000	398000	1480000	1450000	1450000	995000	945000	933000	560000	546000	531000	608000	641000	698000	808000	779000	845000	267000	291000	287000	1400000	1370000	1380000	927000	883000	869000	0.72:0.70:0.68:0.78:0.82:0.90:1.04:1.00:1.08:0.34:0.37:0.37:1.80:1.76:1.77:1.19:1.13:1.12	713000	939000	668000	853000	1.00:1.28
111	313	ag|104162|CS60.230410CS600004810000A	3.98	25	9	4	Acetylation (N-term); Dehydration; Dihydroxy	582000	568000	552000	658000	694000	754000	866000	836000	907000	380000	415000	398000	1480000	1450000	1450000	995000	945000	933000	560000	546000	531000	608000	641000	698000	808000	779000	845000	267000	291000	287000	1400000	1370000	1380000	927000	883000	869000	0.72:0.70:0.68:0.78:0.82:0.90:1.04:1.00:1.08:0.34:0.37:0.37:1.80:1.76:1.77:1.19:1.13:1.12	713000	939000	668000	853000	1.00:1.28
14	12	ag|045840|140304CS1901088200001	3.97	34	24	13	Carbamidomethylation; Deamidation (NQ); Pyro-glu from Q; Hydroxylation; Carbamylation; 2 more	23700000	23400000	23100000	20600000	20800000	22500000	31600000	32500000	33200000	25900000	26000000	27000000	25200000	25200000	25600000	32600000	31300000	30800000	7230000	7460000	7100000	6420000	6780000	7060000	11400000	11700000	12400000	10700000	10900000	11000000	9260000	9130000	9250000	11800000	11500000	11200000	0.62:0.64:0.61:0.55:0.58:0.60:0.97:1.00:1.06:0.92:0.93:0.94:0.79:0.78:0.79:1.01:0.99:0.96	26000000	28300000	8620000	10500000	1.00:1.22
59	78	ag|044812|140304CS1901307500001	3.92	40	12	11	Formylation; Deoxy	1730000	1750000	1780000	3530000	3740000	3780000	3230000	3310000	3310000	2540000	2640000	2590000	5460000	5000000	5040000	2510000	1870000	2000000	1140000	1200000	1120000	1250000	1300000	1340000	1700000	1730000	1780000	1580000	1620000	1620000	2670000	2610000	2660000	1390000	812000	824000	0.66:0.69:0.65:0.72:0.75:0.77:0.98:1.00:1.03:0.91:0.94:0.94:1.54:1.51:1.54:0.80:0.47:0.48	2980000	3570000	1400000	1810000	1.00:1.30
143	191	ag|101846|CS60.230410CS6000034700014	3.84	47	9	3	Carbamidomethylation; Methylation(others); Ubiquitin	361000	332000	377000	491000	476000	518000	621000	604000	521000	52500	40500	60200	685000	704000	707000	374000	351000	344000	361000	332000	377000	491000	476000	518000	621000	604000	521000	52500	40500	60200	685000	704000	707000	374000	351000	344000	0.60:0.55:0.62:0.81:0.79:0.86:1.03:1.00:0.86:0.09:0.07:0.10:1.13:1.16:1.17:0.62:0.58:0.57	478000	456000	478000	456000	1.00:0.96
143	192	ag|186696|Deer_XM_019960255.1	3.84	40	9	3	Carbamidomethylation; Methylation(others); Ubiquitin	361000	332000	377000	491000	476000	518000	621000	604000	521000	52500	40500	60200	685000	704000	707000	374000	351000	344000	361000	332000	377000	491000	476000	518000	621000	604000	521000	52500	40500	60200	685000	704000	707000	374000	351000	344000	0.60:0.55:0.62:0.81:0.79:0.86:1.03:1.00:0.86:0.09:0.07:0.10:1.13:1.16:1.17:0.62:0.58:0.57	478000	456000	478000	456000	1.00:0.96
416	619	ag|100588|CS60.230410CS600002710001A	3.82	36	3	3		215000	223000	206000	162000	182000	187000	235000	287000	311000	193000	251000	227000	414000	395000	394000	225000	225000	207000	215000	223000	206000	162000	182000	187000	235000	287000	311000	193000	251000	227000	414000	395000	394000	225000	225000	207000	0.75:0.78:0.72:0.57:0.63:0.65:0.82:1.00:1.09:0.67:0.87:0.79:1.44:1.38:1.37:0.78:0.78:0.72	223000	281000	223000	281000	1.00:1.26
416	620	ag|100587|CS60.230410CS6000027100019	3.82	16	3	3		215000	223000	206000	162000	182000	187000	235000	287000	311000	193000	251000	227000	414000	395000	394000	225000	225000	207000	215000	223000	206000	162000	182000	187000	235000	287000	311000	193000	251000	227000	414000	395000	394000	225000	225000	207000	0.75:0.78:0.72:0.57:0.63:0.65:0.82:1.00:1.09:0.67:0.87:0.79:1.44:1.38:1.37:0.78:0.78:0.72	223000	281000	223000	281000	1.00:1.26
397	641	ag|048252|140304CS1901280900001	3.79	16	3	3	Carbamidomethylation	263000	426000	255000	259000	236000	298000	561000	458000	302000	165000	121000	148000	348000	306000	461000	233000	295000	276000	263000	426000	255000	259000	236000	298000	561000	458000	302000	165000	121000	148000	348000	306000	461000	233000	295000	276000	0.57:0.93:0.56:0.57:0.52:0.65:1.23:1.00:0.66:0.36:0.26:0.32:0.76:0.67:1.01:0.51:0.64:0.60	340000	262000	340000	262000	1.00:0.77
312	557	ag|118926|CS60.230410CS600009850000E	3.79	20	4	3	Carbamidomethylation	32100	35500	55100	371000	399000	398000	342000	358000	351000	225000	192000	219000	665000	652000	650000	161000	152000	148000	32100	35500	55100	371000	399000	398000	342000	358000	351000	225000	192000	219000	665000	652000	650000	161000	152000	148000	0.09:0.10:0.15:1.04:1.12:1.11:0.96:1.00:0.98:0.63:0.54:0.61:1.86:1.82:1.82:0.45:0.43:0.41	335000	393000	335000	393000	1.00:1.17
109	72	ag|052799|140304CS1901141300001	3.76	32	12	12		1080000	1080000	1070000	989000	1120000	1190000	1420000	1590000	1500000	942000	910000	924000	2070000	1950000	2000000	1160000	1240000	1260000	420000	400000	405000	476000	510000	501000	581000	624000	649000	580000	564000	586000	817000	841000	833000	552000	554000	561000	0.67:0.64:0.65:0.76:0.82:0.80:0.93:1.00:1.04:0.93:0.90:0.94:1.31:1.35:1.34:0.88:0.89:0.90	1240000	1530000	507000	654000	1.00:1.29
109	73	ag|138943|Deer_XM_005680331.2	3.76	30	12	12		1080000	1080000	1070000	989000	1120000	1190000	1420000	1590000	1500000	942000	910000	924000	2070000	1950000	2000000	1160000	1240000	1260000	420000	400000	405000	476000	510000	501000	581000	624000	649000	580000	564000	586000	817000	841000	833000	552000	554000	561000	0.67:0.64:0.65:0.76:0.82:0.80:0.93:1.00:1.04:0.93:0.90:0.94:1.31:1.35:1.34:0.88:0.89:0.90	1240000	1530000	507000	654000	1.00:1.29
156	173	ag|103600|CS60.230410CS6000045300008	3.57	38	8	8	Carbamidomethylation	713000	889000	696000	2650000	2740000	3070000	2270000	2300000	2350000	937000	662000	969000	3000000	2980000	3070000	715000	652000	693000	535000	697000	520000	1560000	1620000	1900000	1410000	1440000	1480000	689000	417000	658000	1870000	1850000	1940000	476000	484000	472000	0.37:0.48:0.36:1.09:1.12:1.32:0.98:1.00:1.03:0.48:0.29:0.46:1.30:1.29:1.35:0.33:0.34:0.33	2010000	1650000	1240000	1050000	1.00:0.85
306	321	ag|043792|140304CS1901230800001	3.44	9	4	4		381000	378000	368000	348000	351000	375000	375000	385000	407000	452000	459000	483000	647000	616000	642000	357000	351000	356000	355000	351000	345000	291000	298000	319000	332000	350000	368000	384000	386000	390000	562000	533000	543000	316000	310000	317000	1.02:1.00:0.99:0.83:0.85:0.91:0.95:1.00:1.05:1.10:1.10:1.11:1.61:1.52:1.55:0.90:0.89:0.90	374000	485000	334000	416000	1.00:1.24
408	553	ag|016838|NODE_2040489	3.44	10	2	2	Carbamidomethylation	138000	132000	142000	149000	154000	157000	309000	318000	333000	50200	47900	50600	88100	74200	75600	351000	349000	335000	138000	132000	142000	149000	154000	157000	309000	318000	333000	50200	47900	50600	88100	74200	75600	351000	349000	335000	0.43:0.41:0.45:0.47:0.48:0.49:0.97:1.00:1.05:0.16:0.15:0.16:0.28:0.23:0.24:1.10:1.10:1.05	203000	158000	203000	158000	1.00:0.78
169	688	ag|007033|NODE_1465825	3.43	13	3	3	Deamidation (NQ); Hydroxylation; Formylation	1410000	1520000	1460000	1290000	1480000	1710000	1800000	1940000	1860000	1650000	1640000	1580000	2680000	2690000	2710000	1450000	1610000	1680000	1410000	1520000	1460000	1290000	1480000	1440000	1800000	1650000	1860000	1650000	1640000	1580000	2380000	2690000	2710000	1450000	1610000	1430000	0.86:0.92:0.88:0.78:0.90:0.87:1.09:1.00:1.13:1.00:0.99:0.96:1.44:1.63:1.64:0.88:0.97:0.87	1870000	2220000	1590000	1940000	1.00:1.22
351	265	ag|188985|Deer_XM_019980348.1	3.38	3	2	2	Carbamidomethylation	159000	165000	158000	97900	35200	35700	134000	141000	82500	5590	0	0	303000	118000	147000	80900	63000	36900	159000	165000	158000	97900	35200	35700	134000	141000	82500	5590	0	0	303000	118000	147000	80900	63000	36900	1.13:1.17:1.12:0.69:0.25:0.25:0.95:1.00:0.59:0.04:0:0:2.15:0.84:1.04:0.57:0.45:0.26	135000	141000	135000	141000	1.00:1.04
351	266	ag|145706|Deer_XM_018064142.1	3.38	3	2	2	Carbamidomethylation	159000	165000	158000	97900	35200	35700	134000	141000	82500	5590	0	0	303000	118000	147000	80900	63000	36900	159000	165000	158000	97900	35200	35700	134000	141000	82500	5590	0	0	303000	118000	147000	80900	63000	36900	1.13:1.17:1.12:0.69:0.25:0.25:0.95:1.00:0.59:0.04:0:0:2.15:0.84:1.04:0.57:0.45:0.26	135000	141000	135000	141000	1.00:1.04
30	225	ag|180064|Deer_XM_012155064.2	3.31	9	7	1	Carbamidomethylation; Hydroxylation; Carbamylation	332000	364000	324000	353000	363000	405000	582000	580000	632000	991000	1070000	984000	618000	643000	621000	720000	718000	698000	332000	364000	324000	353000	363000	405000	582000	580000	632000	991000	1070000	984000	618000	643000	621000	720000	718000	698000	0.57:0.63:0.56:0.61:0.62:0.70:1.00:1.00:1.09:1.71:1.85:1.69:1.07:1.11:1.07:1.24:1.24:1.20	437000	785000	437000	785000	1.00:1.80
230	544	ag|087839|CS60.230410CS6000014000014	3.27	17	3	3	Carbamidomethylation; Methylation(KR)	219000	232000	209000	267000	290000	291000	764000	735000	683000	287000	865000	287000	199000	197000	198000	900000	895000	893000	219000	232000	209000	267000	290000	291000	764000	735000	683000	287000	865000	287000	199000	197000	198000	900000	895000	893000	0.30:0.32:0.28:0.36:0.39:0.40:1.04:1.00:0.93:0.39:1.18:0.39:0.27:0.27:0.27:1.22:1.22:1.22	477000	756000	477000	756000	1.00:1.58
22	11	ag|099399|CS60.230410CS6000019100002	3.26	63	23	2	Carbamidomethylation; Deamidation (NQ)	2030000	2040000	1950000	854000	899000	1020000	2330000	2510000	2630000	3070000	2860000	3210000	767000	707000	760000	3110000	2980000	3030000	2030000	2040000	1950000	854000	899000	1020000	2330000	2510000	2630000	3070000	2860000	3210000	767000	707000	760000	3110000	2980000	3030000	0.81:0.82:0.78:0.34:0.36:0.41:0.93:1.00:1.05:1.22:1.14:1.28:0.31:0.28:0.30:1.24:1.19:1.21	2050000	2630000	2050000	2630000	1.00:1.29
236	89	ag|035654|NODE_637476	3.2	9	5	1		90100	92200	85700	89600	100000	102000	129000	136000	155000	73400	76100	83000	67900	68900	74800	114000	106000	107000	90100	92200	85700	89600	100000	102000	129000	136000	155000	73400	76100	83000	67900	68900	74800	114000	106000	107000	0.66:0.68:0.63:0.66:0.74:0.75:0.95:1.00:1.14:0.54:0.56:0.61:0.50:0.51:0.55:0.84:0.78:0.78	109000	85700	109000	85700	1.00:0.79
61	47	ag|134733|Deer_NM_001205727.1	3.19	49	19	8	Carbamidomethylation	765000	751000	798000	1070000	1150000	1210000	1230000	1270000	1310000	629000	692000	681000	2110000	2160000	2140000	792000	686000	760000	451000	430000	469000	594000	598000	663000	606000	636000	647000	430000	491000	492000	1180000	1180000	1150000	491000	448000	448000	0.71:0.68:0.74:0.93:0.94:1.04:0.95:1.00:1.02:0.68:0.77:0.77:1.86:1.86:1.81:0.77:0.71:0.70	1060000	1430000	566000	756000	1.00:1.34
269	1352	ag|048617|140304CS1901083100001	3.14	13	2	2		1920000	1870000	1850000	2150000	2240000	2330000	2700000	2790000	2940000	992000	1010000	713000	2060000	2140000	2090000	2070000	1980000	1940000	1410000	1360000	1390000	1730000	1820000	1860000	2280000	2400000	2500000	694000	707000	713000	1710000	1700000	1670000	1810000	1790000	1750000	0.59:0.57:0.58:0.72:0.76:0.78:0.95:1.00:1.04:0.29:0.29:0.30:0.71:0.71:0.70:0.75:0.75:0.73	2310000	1700000	1860000	1390000	1.00:0.75
269	1400	ag|127483|CS60.230410CS60000435FFFFA	3.14	17	2	2		1920000	1870000	1850000	2150000	2240000	2330000	2700000	2790000	2940000	992000	1010000	713000	2060000	2140000	2090000	2070000	1980000	1940000	1410000	1360000	1390000	1730000	1820000	1860000	2280000	2400000	2500000	694000	707000	713000	1710000	1700000	1670000	1810000	1790000	1750000	0.59:0.57:0.58:0.72:0.76:0.78:0.95:1.00:1.04:0.29:0.29:0.30:0.71:0.71:0.70:0.75:0.75:0.73	2310000	1700000	1860000	1390000	1.00:0.75
269	1401	ag|103257|CS60.230410CS600004350000A	3.14	14	2	2		1920000	1870000	1850000	2150000	2240000	2330000	2700000	2790000	2940000	992000	1010000	713000	2060000	2140000	2090000	2070000	1980000	1940000	1410000	1360000	1390000	1730000	1820000	1860000	2280000	2400000	2500000	694000	707000	713000	1710000	1700000	1670000	1810000	1790000	1750000	0.59:0.57:0.58:0.72:0.76:0.78:0.95:1.00:1.04:0.29:0.29:0.30:0.71:0.71:0.70:0.75:0.75:0.73	2310000	1700000	1860000	1390000	1.00:0.75
142	341	ag|134322|tr|Q1PHW0|Q1PHW0_CEREL	3.12	51	6	4	Methylation(others); Ubiquitin	683000	647000	652000	916000	927000	961000	1250000	1260000	1300000	621000	628000	603000	870000	880000	876000	710000	756000	710000	577000	531000	547000	791000	800000	832000	1070000	1100000	1170000	541000	571000	533000	803000	808000	808000	645000	642000	626000	0.52:0.48:0.50:0.72:0.73:0.75:0.97:1.00:1.06:0.49:0.52:0.48:0.73:0.73:0.73:0.58:0.58:0.57	955000	739000	825000	664000	1.00:0.80
142	342	ag|049289|140304CS19016412FFFFE	3.12	40	6	4	Methylation(others); Ubiquitin	683000	647000	652000	916000	927000	961000	1250000	1260000	1300000	621000	628000	603000	870000	880000	876000	710000	756000	710000	577000	531000	547000	791000	800000	832000	1070000	1100000	1170000	541000	571000	533000	803000	808000	808000	645000	642000	626000	0.52:0.48:0.50:0.72:0.73:0.75:0.97:1.00:1.06:0.49:0.52:0.48:0.73:0.73:0.73:0.58:0.58:0.57	955000	739000	825000	664000	1.00:0.80
572	1377	ag|155895|Deer_NM_001015531.1	3.09	7	1	1	Carbamidomethylation	42300	42500	43500	29600	2920	29600	0	0	0	0	24700	22300	0	0	0	17100	21600	0	42300	42500	43500	29600	2920	29600	0	0	0	0	24700	22300	0	0	0	17100	21600	0	64.00:64.00:64.00:64.00:64.00:64.00:-:-:-:-:64.00:64.00:-:-:-:64.00:64.00:-	31700	21400	31700	21400	1.00:0.68
572	1378	ag|043702|140304CS1901925900001	3.09	7	1	1	Carbamidomethylation	42300	42500	43500	29600	2920	29600	0	0	0	0	24700	22300	0	0	0	17100	21600	0	42300	42500	43500	29600	2920	29600	0	0	0	0	24700	22300	0	0	0	17100	21600	0	64.00:64.00:64.00:64.00:64.00:64.00:-:-:-:-:64.00:64.00:-:-:-:64.00:64.00:-	31700	21400	31700	21400	1.00:0.68
572	1379	ag|102270|CS60.230410CS6000037900005	3.09	6	1	1	Carbamidomethylation	42300	42500	43500	29600	2920	29600	0	0	0	0	24700	22300	0	0	0	17100	21600	0	42300	42500	43500	29600	2920	29600	0	0	0	0	24700	22300	0	0	0	17100	21600	0	64.00:64.00:64.00:64.00:64.00:64.00:-:-:-:-:64.00:64.00:-:-:-:64.00:64.00:-	31700	21400	31700	21400	1.00:0.68
366	518	ag|143174|Deer_XM_018043344.1	3.08	18	3	3		177000	205000	163000	259000	209000	205000	263000	255000	270000	224000	202000	247000	385000	375000	401000	227000	223000	216000	177000	205000	163000	259000	209000	205000	263000	255000	270000	224000	202000	247000	385000	375000	401000	227000	223000	216000	0.69:0.81:0.64:1.01:0.82:0.80:1.03:1.00:1.06:0.88:0.79:0.97:1.51:1.47:1.57:0.89:0.87:0.85	229000	282000	229000	282000	1.00:1.23
366	519	ag|054287|140304CS1901116500001	3.08	10	3	3		177000	205000	163000	259000	209000	205000	263000	255000	270000	224000	202000	247000	385000	375000	401000	227000	223000	216000	177000	205000	163000	259000	209000	205000	263000	255000	270000	224000	202000	247000	385000	375000	401000	227000	223000	216000	0.69:0.81:0.64:1.01:0.82:0.80:1.03:1.00:1.06:0.88:0.79:0.97:1.51:1.47:1.57:0.89:0.87:0.85	229000	282000	229000	282000	1.00:1.23
333	306	ag|107077|CS60.230410CS600006110000D	3.05	22	5	5	Carbamidomethylation	274000	262000	283000	328000	332000	312000	256000	222000	330000	296000	332000	383000	532000	512000	492000	287000	270000	305000	237000	226000	238000	222000	222000	221000	207000	150000	270000	255000	254000	314000	355000	333000	326000	212000	198000	237000	1.58:1.50:1.59:1.48:1.47:1.47:1.38:1.00:1.80:1.70:1.69:2.09:2.36:2.21:2.17:1.41:1.32:1.57	310000	384000	230000	276000	1.00:1.20
94	588	ag|109394|CS60.230410CS6000000700002	3.03	25	7	3	Carbamidomethylation; Pyro-glu from Q	387000	391000	2920000	2690000	2820000	2940000	642000	702000	6460000	3650000	3930000	3820000	2550000	2540000	2530000	6240000	5920000	6150000	0	0	2540000	2360000	2510000	2630000	0	0	5760000	3360000	3630000	3510000	2310000	2300000	2290000	5550000	5200000	5450000	-:-:64.00:64.00:64.00:64.00:-:-:64.00:64.00:64.00:64.00:64.00:64.00:64.00:64.00:64.00:64.00	3620000	4150000	3160000	3730000	1.00:1.18
592	1560	ag|166540|Deer_NM_001078094.1	2.98	14	1	1		0	0	0	22600	25200	25900	0	0	2550	0	0	0	10800	12000	1300	0	5980	4800	0	0	0	22600	25200	25900	0	0	2550	0	0	0	10800	12000	1300	0	5980	4800	-:-:-:64.00:64.00:64.00:-:-:64.00:-:-:-:64.00:64.00:64.00:-:64.00:64.00	19100	6990	19100	6990	1.00:0.37
592	1561	ag|103897|CS60.230410CS600004670000C	2.98	12	1	1		0	0	0	22600	25200	25900	0	0	2550	0	0	0	10800	12000	1300	0	5980	4800	0	0	0	22600	25200	25900	0	0	2550	0	0	0	10800	12000	1300	0	5980	4800	-:-:-:64.00:64.00:64.00:-:-:64.00:-:-:-:64.00:64.00:64.00:-:64.00:64.00	19100	6990	19100	6990	1.00:0.37
436	16980	tr|L8IKQ8|L8IKQ8_9CETA	2.96	20	6	3		89200	89000	82800	0	47400	42800	344000	388000	298000	53900	49000	0	0	79600	5610	666000	580000	585000	89200	89000	82800	0	47400	42800	344000	388000	298000	53900	49000	0	0	79600	5610	666000	580000	585000	0.23:0.23:0.21:0:0.12:0.11:0.89:1.00:0.77:0.14:0.13:0:0:0.21:0.02:1.72:1.50:1.51	255000	482000	255000	482000	1.00:1.89
436	16981	sp|Q32PJ2|APOA4_BOVIN	2.96	20	6	3		89200	89000	82800	0	47400	42800	344000	388000	298000	53900	49000	0	0	79600	5610	666000	580000	585000	89200	89000	82800	0	47400	42800	344000	388000	298000	53900	49000	0	0	79600	5610	666000	580000	585000	0.23:0.23:0.21:0:0.12:0.11:0.89:1.00:0.77:0.14:0.13:0:0:0.21:0.02:1.72:1.50:1.51	255000	482000	255000	482000	1.00:1.89
436	16982	tr|F1N3Q7|F1N3Q7_BOVIN	2.96	20	6	3		89200	89000	82800	0	47400	42800	344000	388000	298000	53900	49000	0	0	79600	5610	666000	580000	585000	89200	89000	82800	0	47400	42800	344000	388000	298000	53900	49000	0	0	79600	5610	666000	580000	585000	0.23:0.23:0.21:0:0.12:0.11:0.89:1.00:0.77:0.14:0.13:0:0:0.21:0.02:1.72:1.50:1.51	255000	482000	255000	482000	1.00:1.89
199	215	ag|099400|CS60.230410CS6000019100003	2.95	33	6	6	Carbamidomethylation; Pyro-glu from Q	1130000	1120000	980000	808000	836000	799000	1090000	1180000	1240000	552000	489000	457000	1340000	1330000	1430000	956000	790000	750000	675000	719000	647000	492000	527000	510000	660000	669000	696000	210000	218000	212000	775000	775000	814000	523000	498000	476000	1.01:1.07:0.97:0.74:0.79:0.76:0.99:1.00:1.04:0.31:0.33:0.32:1.16:1.16:1.22:0.78:0.74:0.71	1050000	1060000	622000	603000	1.00:0.97
148	169	ag|165138|Deer_XM_005224876.2	2.93	28	7	6	Carbamidomethylation; Deamidation (NQ)	572000	504000	677000	832000	828000	902000	832000	817000	842000	609000	631000	566000	924000	904000	995000	886000	823000	755000	230000	198000	301000	449000	461000	475000	460000	445000	465000	387000	430000	364000	589000	561000	534000	537000	450000	412000	0.52:0.44:0.68:1.01:1.04:1.07:1.03:1.00:1.04:0.87:0.97:0.82:1.32:1.26:1.20:1.21:1.01:0.93	756000	866000	387000	474000	1.00:1.22
148	171	ag|184593|Deer_XM_012124751.1	2.93	31	7	6	Carbamidomethylation; Deamidation (NQ)	572000	504000	677000	832000	828000	902000	832000	817000	842000	609000	631000	566000	924000	904000	995000	886000	823000	755000	230000	198000	301000	449000	461000	475000	460000	445000	465000	387000	430000	364000	589000	561000	534000	537000	450000	412000	0.52:0.44:0.68:1.01:1.04:1.07:1.03:1.00:1.04:0.87:0.97:0.82:1.32:1.26:1.20:1.21:1.01:0.93	756000	866000	387000	474000	1.00:1.22
148	172	ag|047570|140304CS1901364400001	2.93	30	7	6	Carbamidomethylation; Deamidation (NQ)	572000	504000	677000	832000	828000	902000	832000	817000	842000	609000	631000	566000	924000	904000	995000	886000	823000	755000	230000	198000	301000	449000	461000	475000	460000	445000	465000	387000	430000	364000	589000	561000	534000	537000	450000	412000	0.52:0.44:0.68:1.01:1.04:1.07:1.03:1.00:1.04:0.87:0.97:0.82:1.32:1.26:1.20:1.21:1.01:0.93	756000	866000	387000	474000	1.00:1.22
499	1335	ag|066948|CS60.230410CS600012150004E	2.91	6	2	2	Deamidation (NQ); Methylation(others); Ubiquitin	128000	93300	169000	195000	156000	160000	167000	260000	269000	239000	329000	362000	231000	414000	409000	220000	200000	326000	128000	93300	122000	129000	156000	160000	167000	182000	182000	239000	223000	235000	231000	282000	275000	220000	200000	219000	0.71:0.51:0.67:0.71:0.86:0.88:0.92:1.00:1.00:1.32:1.23:1.29:1.27:1.55:1.51:1.21:1.10:1.20	216000	357000	147000	236000	1.00:1.61
410	17039	tr|E1BF59|E1BF59_BOVIN	2.89	1	2	1		24800	19500	39400	50100	64100	54200	87600	96600	99100	121000	131000	123000	156000	152000	152000	103000	92900	92100	24800	19500	39400	50100	64100	54200	87600	96600	99100	121000	131000	123000	156000	152000	152000	103000	92900	92100	0.26:0.20:0.41:0.52:0.66:0.56:0.91:1.00:1.03:1.25:1.36:1.27:1.61:1.57:1.57:1.07:0.96:0.95	59500	125000	59500	125000	1.00:2.10
433	951	ag|058172|CS60.230410CS6000106600005	2.86	10	1	1		0	3580	0	73800	0	58700	57800	50300	0	22500	29500	32600	14900	0	0	39900	24500	27000	0	3580	0	73800	0	58700	57800	50300	0	22500	29500	32600	14900	0	0	39900	24500	27000	0:0.07:0:1.47:0:1.17:1.15:1.00:0:0.45:0.59:0.65:0.30:0:0:0.79:0.49:0.54	48800	27300	48800	27300	1.00:0.56
346	920	ag|145278|Deer_XM_018064747.1	2.78	14	2	2	Deamidation (NQ)	114000	122000	116000	121000	150000	162000	135000	134000	152000	0	10200	8680	170000	150000	172000	50200	51800	48300	114000	122000	116000	121000	150000	162000	135000	134000	152000	0	10200	8680	170000	150000	172000	50200	51800	48300	0.85:0.91:0.86:0.90:1.12:1.21:1.01:1.00:1.13:0:0.08:0.06:1.27:1.12:1.29:0.37:0.39:0.36	148000	95100	148000	95100	1.00:0.64
249	471	ag|101675|CS60.230410CS6000033700008	2.7	29	4	4	Deamidation (NQ)	392000	396000	394000	552000	463000	586000	508000	543000	557000	164000	197000	203000	661000	772000	738000	350000	389000	358000	392000	396000	394000	446000	463000	479000	473000	497000	529000	116000	148000	127000	661000	666000	665000	336000	330000	333000	0.79:0.80:0.79:0.90:0.93:0.96:0.95:1.00:1.06:0.23:0.30:0.26:1.33:1.34:1.34:0.68:0.66:0.67	517000	441000	452000	384000	1.00:0.85
249	472	ag|182562|Deer_XM_012122772.2	2.7	29	4	4	Deamidation (NQ)	392000	396000	394000	552000	463000	586000	508000	543000	557000	164000	197000	203000	661000	772000	738000	350000	389000	358000	392000	396000	394000	446000	463000	479000	473000	497000	529000	116000	148000	127000	661000	666000	665000	336000	330000	333000	0.79:0.80:0.79:0.90:0.93:0.96:0.95:1.00:1.06:0.23:0.30:0.26:1.33:1.34:1.34:0.68:0.66:0.67	517000	441000	452000	384000	1.00:0.85
249	473	ag|048573|140304CS1901523500001	2.7	27	4	4	Deamidation (NQ)	392000	396000	394000	552000	463000	586000	508000	543000	557000	164000	197000	203000	661000	772000	738000	350000	389000	358000	392000	396000	394000	446000	463000	479000	473000	497000	529000	116000	148000	127000	661000	666000	665000	336000	330000	333000	0.79:0.80:0.79:0.90:0.93:0.96:0.95:1.00:1.06:0.23:0.30:0.26:1.33:1.34:1.34:0.68:0.66:0.67	517000	441000	452000	384000	1.00:0.85
516	626	ag|007660|NODE_1487718	2.68	14	2	2		110000	108000	113000	175000	189000	195000	168000	175000	64600	132000	133000	133000	317000	312000	308000	194000	47400	47200	110000	108000	113000	175000	189000	195000	168000	175000	64600	132000	133000	133000	317000	312000	308000	194000	47400	47200	0.63:0.62:0.65:1.00:1.08:1.11:0.96:1.00:0.37:0.75:0.76:0.76:1.81:1.79:1.76:1.11:0.27:0.27	155000	244000	155000	244000	1.00:1.58
516	627	ag|175259|Deer_XM_015095952.1	2.68	10	2	2		110000	108000	113000	175000	189000	195000	168000	175000	64600	132000	133000	133000	317000	312000	308000	194000	47400	47200	110000	108000	113000	175000	189000	195000	168000	175000	64600	132000	133000	133000	317000	312000	308000	194000	47400	47200	0.63:0.62:0.65:1.00:1.08:1.11:0.96:1.00:0.37:0.75:0.76:0.76:1.81:1.79:1.76:1.11:0.27:0.27	155000	244000	155000	244000	1.00:1.58
429	675	ag|024898|NODE_2415512	2.66	10	2	2	Carbamidomethylation	171000	169000	156000	208000	233000	228000	315000	399000	342000	161000	165000	169000	231000	215000	217000	215000	226000	205000	171000	169000	156000	208000	233000	228000	315000	399000	342000	161000	165000	169000	231000	215000	217000	215000	226000	205000	0.43:0.42:0.39:0.52:0.58:0.57:0.79:1.00:0.86:0.40:0.41:0.42:0.58:0.54:0.54:0.54:0.57:0.51	247000	200000	247000	200000	1.00:0.81
378	942	ag|113205|CS60.230410CS600008270000D	2.66	21	2	2		182000	180000	194000	243000	248000	250000	270000	283000	280000	155000	164000	159000	407000	403000	382000	395000	326000	310000	182000	180000	194000	243000	248000	250000	270000	283000	280000	155000	164000	159000	407000	403000	382000	395000	326000	310000	0.64:0.64:0.69:0.86:0.87:0.88:0.95:1.00:0.99:0.55:0.58:0.56:1.44:1.42:1.35:1.39:1.15:1.10	237000	300000	237000	300000	1.00:1.27
378	943	ag|133181|sp|Q09YK1|CAV1_MUNMU	2.66	20	2	2		182000	180000	194000	243000	248000	250000	270000	283000	280000	155000	164000	159000	407000	403000	382000	395000	326000	310000	182000	180000	194000	243000	248000	250000	270000	283000	280000	155000	164000	159000	407000	403000	382000	395000	326000	310000	0.64:0.64:0.69:0.86:0.87:0.88:0.95:1.00:0.99:0.55:0.58:0.56:1.44:1.42:1.35:1.39:1.15:1.10	237000	300000	237000	300000	1.00:1.27
138	147	ag|047251|140304CS1900470500001	2.65	31	7	5	Carbamidomethylation; Acetylation (Protein N-term)	567000	556000	598000	773000	752000	696000	905000	950000	990000	496000	516000	494000	1100000	1160000	952000	647000	694000	684000	384000	373000	416000	459000	424000	366000	664000	756000	841000	473000	479000	472000	897000	938000	759000	529000	534000	498000	0.51:0.49:0.55:0.61:0.56:0.48:0.88:1.00:1.11:0.63:0.63:0.62:1.19:1.24:1.00:0.70:0.71:0.66	853000	870000	619000	726000	1.00:1.17
138	148	ag|099928|CS60.230410CS6000022900001	2.65	29	7	5	Carbamidomethylation; Acetylation (Protein N-term)	567000	556000	598000	773000	752000	696000	905000	950000	990000	496000	516000	494000	1100000	1160000	952000	647000	694000	684000	384000	373000	416000	459000	424000	366000	664000	756000	841000	473000	479000	472000	897000	938000	759000	529000	534000	498000	0.51:0.49:0.55:0.61:0.56:0.48:0.88:1.00:1.11:0.63:0.63:0.62:1.19:1.24:1.00:0.70:0.71:0.66	853000	870000	619000	726000	1.00:1.17
574	1373	ag|105086|CS60.230410CS6000052700015	2.62	7	1	1		9690	4250	0	29700	31500	35300	0	32600	30600	38300	29600	30100	70600	78400	66300	0	18100	14500	9690	4250	0	29700	31500	35300	0	32600	30600	38300	29600	30100	70600	78400	66300	0	18100	14500	0.30:0.13:0:0.91:0.96:1.08:0:1.00:0.94:1.17:0.91:0.92:2.16:2.40:2.03:0:0.55:0.44	24800	43200	24800	43200	1.00:1.74
574	1456	ag|189634|Deer_XM_019976126.1	2.62	4	1	1		9690	4250	0	29700	31500	35300	0	32600	30600	38300	29600	30100	70600	78400	66300	0	18100	14500	9690	4250	0	29700	31500	35300	0	32600	30600	38300	29600	30100	70600	78400	66300	0	18100	14500	0.30:0.13:0:0.91:0.96:1.08:0:1.00:0.94:1.17:0.91:0.92:2.16:2.40:2.03:0:0.55:0.44	24800	43200	24800	43200	1.00:1.74
574	1457	ag|149750|Deer_XM_018060250.1	2.62	4	1	1		9690	4250	0	29700	31500	35300	0	32600	30600	38300	29600	30100	70600	78400	66300	0	18100	14500	9690	4250	0	29700	31500	35300	0	32600	30600	38300	29600	30100	70600	78400	66300	0	18100	14500	0.30:0.13:0:0.91:0.96:1.08:0:1.00:0.94:1.17:0.91:0.92:2.16:2.40:2.03:0:0.55:0.44	24800	43200	24800	43200	1.00:1.74
490	729	ag|141938|Deer_XM_005679443.3	2.46	4	1	1		68300	62900	68800	191000	297000	201000	66800	75500	76200	0	18600	26000	140000	143000	142000	141000	138000	72200	68300	62900	68800	191000	297000	201000	66800	75500	76200	0	18600	26000	140000	143000	142000	141000	138000	72200	0.90:0.83:0.91:2.54:3.93:2.67:0.88:1.00:1.01:0:0.25:0.34:1.86:1.89:1.88:1.87:1.83:0.96	123000	103000	123000	103000	1.00:0.83
165	325	ag|055002|CS60.230410CS6000100500029	2.45	27	7	3		408000	402000	401000	409000	413000	701000	719000	746000	793000	527000	592000	550000	411000	391000	400000	916000	904000	909000	282000	271000	277000	262000	262000	547000	444000	454000	488000	449000	462000	464000	293000	277000	283000	590000	586000	575000	0.62:0.60:0.61:0.58:0.58:1.20:0.98:1.00:1.08:0.99:1.02:1.02:0.65:0.61:0.62:1.30:1.29:1.27	555000	690000	365000	510000	1.00:1.40
48	17001	tr|A0A212D5P0|A0A212D5P0_CEREH	2.41	63	60	1	Carbamidomethylation; Deamidation (NQ); Pyro-glu from Q; Acetylation (N-term); Formylation; 10 more	3310000	3270000	3180000	4080000	4260000	4370000	1900000	1970000	2030000	7760	10500	9690	4060000	4060000	4020000	1520000	2200000	2200000	3310000	3270000	3180000	4080000	4260000	4370000	1900000	1970000	2030000	7760	10500	9690	4060000	4060000	4020000	1520000	2200000	2200000	1.68:1.67:1.62:2.07:2.16:2.22:0.96:1.00:1.03:0.02:0.02:0.02:2.06:2.07:2.04:0.77:1.12:1.12	3150000	2010000	3150000	2010000	1.00:0.64
527	576	ag|024897|NODE_2415511	2.37	2	1	1		43200	45200	38500	49900	53600	56200	90300	97000	102000	47200	45600	46200	40500	38900	39900	64800	64700	61300	43200	45200	38500	49900	53600	56200	90300	97000	102000	47200	45600	46200	40500	38900	39900	64800	64700	61300	0.45:0.47:0.40:0.51:0.55:0.58:0.93:1.00:1.05:0.49:0.47:0.48:0.42:0.40:0.41:0.67:0.67:0.63	63900	49900	63900	49900	1.00:0.78
215	893	ag|049388|140304CS1901015100001	2.34	21	4	4	Acetylation (N-term)	1350000	1290000	1250000	1220000	1240000	1330000	1710000	1740000	1810000	947000	1150000	1160000	2110000	2220000	2160000	1240000	1520000	1540000	1170000	1090000	1070000	1050000	1060000	1150000	1540000	1580000	1630000	947000	1150000	1160000	1880000	1980000	1920000	1240000	1520000	1540000	0.74:0.69:0.68:0.66:0.67:0.73:0.98:1.00:1.03:0.60:0.73:0.73:1.19:1.26:1.22:0.79:0.96:0.98	1440000	1720000	1260000	1480000	1.00:1.18
215	894	ag|115469|CS60.230410CS6000008900001	2.34	20	4	4	Acetylation (N-term)	1350000	1290000	1250000	1220000	1240000	1330000	1710000	1740000	1810000	947000	1150000	1160000	2110000	2220000	2160000	1240000	1520000	1540000	1170000	1090000	1070000	1050000	1060000	1150000	1540000	1580000	1630000	947000	1150000	1160000	1880000	1980000	1920000	1240000	1520000	1540000	0.74:0.69:0.68:0.66:0.67:0.73:0.98:1.00:1.03:0.60:0.73:0.73:1.19:1.26:1.22:0.79:0.96:0.98	1440000	1720000	1260000	1480000	1.00:1.18
546	1122	ag|101504|CS60.230410CS6000032800005	2.32	13	1	1		0	0	0	60500	62400	0	0	55300	62700	0	0	0	87900	86700	88200	38300	36100	34300	0	0	0	60500	62400	0	0	55300	62700	0	0	0	87900	86700	88200	38300	36100	34300	0:0:0:1.09:1.13:0:0:1.00:1.13:0:0:0:1.59:1.57:1.59:0.69:0.65:0.62	60200	61900	60200	61900	1.00:1.03
546	1123	ag|052838|140304CS1900972700001	2.32	13	1	1		0	0	0	60500	62400	0	0	55300	62700	0	0	0	87900	86700	88200	38300	36100	34300	0	0	0	60500	62400	0	0	55300	62700	0	0	0	87900	86700	88200	38300	36100	34300	0:0:0:1.09:1.13:0:0:1.00:1.13:0:0:0:1.59:1.57:1.59:0.69:0.65:0.62	60200	61900	60200	61900	1.00:1.03
28	46	ag|051876|140304CS1901057300001	2.3	32	16	1	Carbamidomethylation; Deamidation (NQ); Hydroxylation	52900	53100	49700	68000	66500	76200	64700	65000	71200	74000	64000	71000	161000	198000	154000	86500	82900	80500	52900	53100	49700	68000	66500	76200	64700	65000	71200	74000	64000	71000	161000	198000	154000	86500	82900	80500	0.81:0.82:0.77:1.05:1.02:1.17:1.00:1.00:1.10:1.14:0.99:1.09:2.47:3.06:2.37:1.33:1.28:1.24	63000	108000	63000	108000	1.00:1.71
186	154	ag|104737|CS60.230410CS6000051000002	2.27	21	4	4		225000	233000	374000	432000	299000	420000	481000	734000	513000	33000	97900	28100	659000	666000	603000	265000	434000	313000	225000	233000	374000	359000	227000	352000	449000	716000	513000	33000	97900	28100	595000	588000	603000	258000	398000	301000	0.31:0.33:0.52:0.50:0.32:0.49:0.63:1.00:0.72:0.05:0.14:0.04:0.83:0.82:0.84:0.36:0.56:0.42	517000	463000	465000	423000	1.00:0.91
186	155	ag|148308|Deer_XM_018066231.1	2.27	20	4	4		225000	233000	374000	432000	299000	420000	481000	734000	513000	33000	97900	28100	659000	666000	603000	265000	434000	313000	225000	233000	374000	359000	227000	352000	449000	716000	513000	33000	97900	28100	595000	588000	603000	258000	398000	301000	0.31:0.33:0.52:0.50:0.32:0.49:0.63:1.00:0.72:0.05:0.14:0.04:0.83:0.82:0.84:0.36:0.56:0.42	517000	463000	465000	423000	1.00:0.91
565	17063	tr|A0A212CA18|A0A212CA18_CEREH	2.25	36	5	1	Carbamidomethylation	302000	189000	350000	383000	397000	373000	417000	480000	438000	15000	15200	13500	266000	263000	253000	359000	349000	308000	302000	189000	350000	383000	397000	373000	417000	480000	438000	15000	15200	13500	266000	263000	253000	359000	349000	308000	0.63:0.39:0.73:0.80:0.83:0.78:0.87:1.00:0.91:0.03:0.03:0.03:0.55:0.55:0.53:0.75:0.73:0.64	370000	205000	370000	205000	1.00:0.55
565	17064	sp|Q2KIS7|TETN_BOVIN	2.25	25	4	1	Carbamidomethylation	302000	189000	350000	383000	397000	373000	417000	480000	438000	15000	15200	13500	266000	263000	253000	359000	349000	308000	302000	189000	350000	383000	397000	373000	417000	480000	438000	15000	15200	13500	266000	263000	253000	359000	349000	308000	0.63:0.39:0.73:0.80:0.83:0.78:0.87:1.00:0.91:0.03:0.03:0.03:0.55:0.55:0.53:0.75:0.73:0.64	370000	205000	370000	205000	1.00:0.55
565	17065	tr|L8IKS7|L8IKS7_9CETA	2.25	25	4	1	Carbamidomethylation	302000	189000	350000	383000	397000	373000	417000	480000	438000	15000	15200	13500	266000	263000	253000	359000	349000	308000	302000	189000	350000	383000	397000	373000	417000	480000	438000	15000	15200	13500	266000	263000	253000	359000	349000	308000	0.63:0.39:0.73:0.80:0.83:0.78:0.87:1.00:0.91:0.03:0.03:0.03:0.55:0.55:0.53:0.75:0.73:0.64	370000	205000	370000	205000	1.00:0.55
565	17066	tr|W5PN97|W5PN97_SHEEP	2.25	25	4	1	Carbamidomethylation	302000	189000	350000	383000	397000	373000	417000	480000	438000	15000	15200	13500	266000	263000	253000	359000	349000	308000	302000	189000	350000	383000	397000	373000	417000	480000	438000	15000	15200	13500	266000	263000	253000	359000	349000	308000	0.63:0.39:0.73:0.80:0.83:0.78:0.87:1.00:0.91:0.03:0.03:0.03:0.55:0.55:0.53:0.75:0.73:0.64	370000	205000	370000	205000	1.00:0.55
389	660	ag|185551|Deer_NM_001161865.1	2.24	7	2	2	Carbamidomethylation	81700	97000	77200	91600	112000	23700	111000	108000	113000	62700	57800	53800	135000	41200	142000	53000	50300	46700	81700	97000	77200	91600	112000	23700	111000	108000	113000	62700	57800	53800	135000	41200	142000	53000	50300	46700	0.76:0.90:0.72:0.85:1.04:0.22:1.03:1.00:1.05:0.58:0.54:0.50:1.25:0.38:1.32:0.49:0.47:0.43	98800	77300	98800	77300	1.00:0.78
389	661	ag|054458|140304CS1901105100004	2.24	7	2	2	Carbamidomethylation	81700	97000	77200	91600	112000	23700	111000	108000	113000	62700	57800	53800	135000	41200	142000	53000	50300	46700	81700	97000	77200	91600	112000	23700	111000	108000	113000	62700	57800	53800	135000	41200	142000	53000	50300	46700	0.76:0.90:0.72:0.85:1.04:0.22:1.03:1.00:1.05:0.58:0.54:0.50:1.25:0.38:1.32:0.49:0.47:0.43	98800	77300	98800	77300	1.00:0.78
217	157	ag|138856|Deer_XM_018048184.1	2.22	10	4	1		71200	70000	69300	60100	63900	66000	73300	79000	81000	5120	0	0	143000	135000	132000	0	20000	0	71200	70000	69300	60100	63900	66000	73300	79000	81000	5120	0	0	143000	135000	132000	0	20000	0	0.90:0.89:0.88:0.76:0.81:0.84:0.93:1.00:1.03:0.06:0:0:1.80:1.71:1.67:0:0.25:0	70400	87000	70400	87000	1.00:1.23
469	17013	tr|A0A212CIC4|A0A212CIC4_CEREH	2.22	9	3	1		122000	98900	0	179000	193000	0	198000	198000	233000	266000	170000	284000	112000	186000	118000	160000	234000	160000	122000	98900	0	179000	193000	0	198000	198000	233000	266000	170000	284000	112000	186000	118000	160000	234000	160000	0.61:0.50:0:0.91:0.98:0:1.00:1.00:1.18:1.34:0.86:1.44:0.57:0.94:0.59:0.81:1.18:0.81	175000	188000	175000	188000	1.00:1.08
634	1798	ag|100458|CS60.230410CS6000026300001	2.18	4	1	1		91300	85200	79100	78800	81200	86100	124000	121000	123000	0	0	52800	230000	202000	0	0	0	0	91300	85200	79100	78800	81200	86100	124000	121000	123000	0	0	52800	230000	202000	0	0	0	0	0.76:0.71:0.65:0.65:0.67:0.71:1.03:1.00:1.02:0:0:0.44:1.90:1.67:0:0:0:0	96600	161000	96600	161000	1.00:1.67
672	2042	ag|052632|140304CS1901490700001	2.16	2	1	1		26000	27900	34300	14900	14600	23000	23000	12500	17200	0	0	8140	34200	24000	33600	0	6960	0	26000	27900	34300	14900	14600	23000	23000	12500	17200	0	0	8140	34200	24000	33600	0	6960	0	2.08:2.22:2.73:1.18:1.16:1.83:1.83:1.00:1.37:0:0:0.65:2.73:1.91:2.68:0:0.55:0	21500	21400	21500	21400	1.00:1.00
672	17957	tr|A0A212CA55|A0A212CA55_CEREH	2.16	2	1	1		26000	27900	34300	14900	14600	23000	23000	12500	17200	0	0	8140	34200	24000	33600	0	6960	0	26000	27900	34300	14900	14600	23000	23000	12500	17200	0	0	8140	34200	24000	33600	0	6960	0	2.08:2.22:2.73:1.18:1.16:1.83:1.83:1.00:1.37:0:0:0.65:2.73:1.91:2.68:0:0.55:0	21500	21400	21500	21400	1.00:1.00
610	1192	ag|166547|Deer_NM_001076798.1	2.12	2	1	1		19400	15300	0	16200	17100	17000	23800	25500	24700	27900	24200	26900	37900	35200	35800	9320	11900	9260	19400	15300	0	16200	17100	17000	23800	25500	24700	27900	24200	26900	37900	35200	35800	9320	11900	9260	0.76:0.60:0:0.64:0.67:0.67:0.94:1.00:0.97:1.09:0.95:1.06:1.49:1.38:1.40:0.37:0.47:0.36	19900	24300	19900	24300	1.00:1.22
503	1451	ag|103286|CS60.230410CS600004360001D	2.12	10	1	1	Deamidation (NQ)	0	0	0	0	0	0	132000	61600	60000	37100	44900	43300	1980	0	337	0	0	0	0	0	0	0	0	0	132000	61600	60000	37100	44900	43300	1980	0	337	0	0	0	0:0:0:0:0:0:2.14:1.00:0.97:0.60:0.73:0.70:0.03:0:0.02:0:0:0	84400	25500	84400	25500	1.00:0.30
503	1511	ag|127512|CS60.230410CS60000436FFFE3	2.12	24	1	1	Deamidation (NQ)	0	0	0	0	0	0	132000	61600	60000	37100	44900	43300	1980	0	337	0	0	0	0	0	0	0	0	0	132000	61600	60000	37100	44900	43300	1980	0	337	0	0	0	0:0:0:0:0:0:2.14:1.00:0.97:0.60:0.73:0.70:0.03:0:0.02:0:0:0	84400	25500	84400	25500	1.00:0.30
503	1512	ag|154821|Deer_XM_018044774.1	2.12	23	1	1	Deamidation (NQ)	0	0	0	0	0	0	132000	61600	60000	37100	44900	43300	1980	0	337	0	0	0	0	0	0	0	0	0	132000	61600	60000	37100	44900	43300	1980	0	337	0	0	0	0:0:0:0:0:0:2.14:1.00:0.97:0.60:0.73:0.70:0.03:0:0.02:0:0:0	84400	25500	84400	25500	1.00:0.30
383	506	ag|065893|CS60.230410CS6000120400020	2.02	11	3	3	Carbamidomethylation	193000	194000	194000	169000	180000	186000	252000	279000	283000	197000	193000	196000	415000	382000	393000	145000	165000	145000	193000	194000	194000	169000	180000	186000	252000	279000	283000	197000	193000	196000	415000	382000	393000	145000	165000	145000	0.69:0.70:0.70:0.61:0.65:0.67:0.90:1.00:1.01:0.71:0.69:0.70:1.49:1.37:1.41:0.52:0.59:0.52	214000	253000	214000	253000	1.00:1.18
489	953	ag|099903|CS60.230410CS6000022700013	2.01	3	1	1		24500	0	32400	48800	51500	51900	42900	49400	44500	0	77400	59000	82000	90000	81600	33800	53600	34000	24500	0	32400	48800	51500	51900	42900	49400	44500	0	77400	59000	82000	90000	81600	33800	53600	34000	0.50:0:0.66:0.99:1.04:1.05:0.87:1.00:0.90:0:1.57:1.20:1.66:1.82:1.65:0.68:1.09:0.69	43200	63900	43200	63900	1.00:1.48
489	1205	ag|128413|CS60.230410CS60000513FFFFB	2.01	5	1	1		24500	0	32400	48800	51500	51900	42900	49400	44500	0	77400	59000	82000	90000	81600	33800	53600	34000	24500	0	32400	48800	51500	51900	42900	49400	44500	0	77400	59000	82000	90000	81600	33800	53600	34000	0.50:0:0.66:0.99:1.04:1.05:0.87:1.00:0.90:0:1.57:1.20:1.66:1.82:1.65:0.68:1.09:0.69	43200	63900	43200	63900	1.00:1.48
489	955	ag|104796|CS60.230410CS600005130000C	2.01	3	1	1		24500	0	32400	48800	51500	51900	42900	49400	44500	0	77400	59000	82000	90000	81600	33800	53600	34000	24500	0	32400	48800	51500	51900	42900	49400	44500	0	77400	59000	82000	90000	81600	33800	53600	34000	0.50:0:0.66:0.99:1.04:1.05:0.87:1.00:0.90:0:1.57:1.20:1.66:1.82:1.65:0.68:1.09:0.69	43200	63900	43200	63900	1.00:1.48
287	617	ag|163176|Deer_XM_010810128.2	2	17	2	2		140000	131000	142000	142000	136000	157000	168000	181000	181000	126000	136000	125000	301000	304000	301000	104000	102000	114000	140000	131000	142000	142000	136000	157000	168000	181000	181000	126000	136000	125000	301000	304000	301000	104000	102000	114000	0.77:0.72:0.78:0.78:0.75:0.87:0.93:1.00:1.00:0.69:0.75:0.69:1.66:1.67:1.66:0.57:0.56:0.63	153000	179000	153000	179000	1.00:1.17
287	618	ag|101808|CS60.230410CS6000034500009	2	11	2	2		140000	131000	142000	142000	136000	157000	168000	181000	181000	126000	136000	125000	301000	304000	301000	104000	102000	114000	140000	131000	142000	142000	136000	157000	168000	181000	181000	126000	136000	125000	301000	304000	301000	104000	102000	114000	0.77:0.72:0.78:0.78:0.75:0.87:0.93:1.00:1.00:0.69:0.75:0.69:1.66:1.67:1.66:0.57:0.56:0.63	153000	179000	153000	179000	1.00:1.17
252	575	ag|049179|140304CS1900500500001	1.99	23	3	1	Carbamidomethylation	49500	30000	56000	278000	299000	291000	100000	93800	0	0	0	0	148000	163000	154000	78000	77300	76200	49500	30000	56000	278000	299000	291000	100000	93800	0	0	0	0	148000	163000	154000	78000	77300	76200	0.53:0.32:0.60:2.96:3.19:3.10:1.07:1.00:0:0:0:0:1.58:1.73:1.64:0.83:0.82:0.81	150000	116000	150000	116000	1.00:0.78
315	610	ag|140323|Deer_XM_005678648.3	1.96	16	4	4	Carbamidomethylation	247000	245000	257000	219000	239000	249000	123000	348000	110000	45600	43400	48500	449000	442000	228000	102000	99300	107000	207000	216000	219000	207000	224000	212000	103000	317000	110000	45600	43400	48500	403000	402000	182000	102000	99300	107000	0.65:0.68:0.69:0.65:0.71:0.67:0.32:1.00:0.35:0.14:0.14:0.15:1.27:1.27:0.57:0.32:0.31:0.34	259000	315000	232000	271000	1.00:1.17
315	612	ag|047345|140304CS1901129900001	1.96	10	4	4	Carbamidomethylation	247000	245000	257000	219000	239000	249000	123000	348000	110000	45600	43400	48500	449000	442000	228000	102000	99300	107000	207000	216000	219000	207000	224000	212000	103000	317000	110000	45600	43400	48500	403000	402000	182000	102000	99300	107000	0.65:0.68:0.69:0.65:0.71:0.67:0.32:1.00:0.35:0.14:0.14:0.15:1.27:1.27:0.57:0.32:0.31:0.34	259000	315000	232000	271000	1.00:1.17
363	1398	ag|125103|CS60.230410CS60000289FFFFA	1.96	18	1	1	Deamidation (NQ)	6830	1420	14900	302000	267000	144000	128000	175000	181000	461000	13600	6860	318000	92700	310000	321000	274000	196000	6830	1420	14900	37100	4240	144000	128000	175000	181000	461000	13600	6860	318000	21000	310000	38000	26000	25200	0.04:0.02:0.09:0.21:0.02:0.82:0.73:1.00:1.03:2.64:0.08:0.04:1.82:0.12:1.78:0.22:0.15:0.14	341000	329000	76900	136000	1.00:1.76
665	17122	tr|W5PID9|W5PID9_SHEEP	1.95	2	1	1		20600	16800	19800	17900	17100	16600	45600	53000	50500	0	0	0	22400	13500	16000	33300	34600	31100	20600	16800	19800	17900	17100	16600	45600	53000	50500	0	0	0	22400	13500	16000	33300	34600	31100	0.39:0.32:0.37:0.34:0.32:0.31:0.86:1.00:0.95:0:0:0:0.42:0.25:0.30:0.63:0.65:0.59	28700	25100	28700	25100	1.00:0.88
655	2188	ag|188496|Deer_XM_019982968.1	1.94	2	1	1	Deamidation (NQ); Hydroxylation	85900	89300	83100	4370	67800	74100	42200	49700	66300	7600	35400	5440	28800	30700	30900	278000	275000	265000	85900	89300	83100	4370	67800	74100	42200	49700	66300	7600	35400	5440	28800	30700	30900	278000	275000	265000	1.73:1.80:1.67:0.09:1.36:1.49:0.85:1.00:1.33:0.15:0.71:0.11:0.58:0.62:0.62:5.60:5.53:5.34	62500	106000	62500	106000	1.00:1.70
382	670	ag|066836|CS60.230410CS600012140003A	1.93	7	2	2		167000	86600	79000	166000	175000	184000	160000	160000	168000	144000	148000	148000	237000	233000	230000	126000	219000	118000	167000	86600	79000	166000	175000	184000	160000	160000	168000	144000	148000	148000	237000	233000	230000	126000	219000	118000	1.04:0.54:0.49:1.04:1.09:1.15:1.00:1.00:1.05:0.90:0.93:0.93:1.48:1.46:1.44:0.79:1.37:0.74	168000	198000	168000	198000	1.00:1.18
386	1055	ag|006636|NODE_1413316	1.92	16	2	1	Carbamidomethylation	361000	362000	375000	638000	665000	676000	631000	679000	757000	725000	827000	807000	1510000	1530000	1490000	600000	524000	549000	361000	362000	375000	638000	665000	676000	631000	679000	757000	725000	827000	807000	1510000	1530000	1490000	600000	524000	549000	0.53:0.53:0.55:0.94:0.98:1.00:0.93:1.00:1.12:1.07:1.22:1.19:2.22:2.25:2.19:0.88:0.77:0.81	572000	950000	572000	950000	1.00:1.66
386	1056	ag|108674|CS60.230410CS6000066900006	1.92	16	2	1	Carbamidomethylation	361000	362000	375000	638000	665000	676000	631000	679000	757000	725000	827000	807000	1510000	1530000	1490000	600000	524000	549000	361000	362000	375000	638000	665000	676000	631000	679000	757000	725000	827000	807000	1510000	1530000	1490000	600000	524000	549000	0.53:0.53:0.55:0.94:0.98:1.00:0.93:1.00:1.12:1.07:1.22:1.19:2.22:2.25:2.19:0.88:0.77:0.81	572000	950000	572000	950000	1.00:1.66
454	17084	tr|W5PH95|W5PH95_SHEEP	1.9	5	2	1		35700	36100	36600	73600	74700	75100	195000	214000	218000	79100	308000	327000	61900	57600	54500	35400	276000	246000	35700	36100	36600	73600	74700	75100	195000	214000	218000	79100	308000	327000	61900	57600	54500	35400	276000	246000	0.17:0.17:0.17:0.34:0.35:0.35:0.91:1.00:1.02:0.37:1.43:1.53:0.29:0.27:0.25:0.17:1.28:1.15	107000	161000	107000	161000	1.00:1.51
226	310	ag|046872|140304CS1900176500001	1.89	14	5	1		97200	0	0	2100	137000	0	0	168000	5440	0	15000	13100	223000	221000	219000	0	0	0	97200	0	0	2100	137000	0	0	168000	5440	0	15000	13100	223000	221000	219000	0	0	0	0.58:0:0:0.02:0.81:0:0:1.00:0.03:0:0.09:0.08:1.33:1.32:1.30:0:0:0	81900	138000	81900	138000	1.00:1.69
147	97	ag|048474|140304CS1901904500002	1.88	24	7	7	Carbamidomethylation; Persulfide; Deoxy	1300000	1150000	1290000	1230000	1500000	1750000	1820000	1440000	1490000	963000	896000	903000	1150000	1210000	1130000	1110000	1420000	1100000	748000	758000	738000	606000	639000	657000	941000	800000	879000	635000	609000	615000	633000	646000	634000	749000	705000	722000	0.93:0.95:0.92:0.76:0.80:0.82:1.18:1.00:1.10:0.79:0.76:0.77:0.79:0.81:0.79:0.94:0.88:0.90	1490000	1240000	752000	661000	1.00:0.88
377	1032	ag|051012|140304CS1901676000001	1.86	19	2	2	Carbamidomethylation	154000	163000	159000	147000	172000	160000	220000	280000	318000	174000	219000	169000	288000	280000	286000	194000	202000	205000	154000	163000	159000	147000	172000	160000	220000	280000	318000	174000	219000	169000	288000	280000	286000	194000	202000	205000	0.55:0.58:0.57:0.53:0.62:0.57:0.79:1.00:1.14:0.62:0.78:0.60:1.03:1.00:1.02:0.69:0.72:0.73	197000	224000	197000	224000	1.00:1.14
506	889	ag|118378|CS60.230410CS6000097400005	1.83	5	1	1		0	0	5040	38500	26200	30400	38000	36200	0	44200	45100	44300	0	46400	68000	0	13700	16200	0	0	5040	38500	26200	30400	38000	36200	0	44200	45100	44300	0	46400	68000	0	13700	16200	0:0:0.14:1.06:0.73:0.84:1.05:1.00:0:1.22:1.25:1.22:0:1.28:1.88:0:0.38:0.45	29000	39700	29000	39700	1.00:1.37
506	890	ag|039004|NODE_78116	1.83	5	1	1		0	0	5040	38500	26200	30400	38000	36200	0	44200	45100	44300	0	46400	68000	0	13700	16200	0	0	5040	38500	26200	30400	38000	36200	0	44200	45100	44300	0	46400	68000	0	13700	16200	0:0:0.14:1.06:0.73:0.84:1.05:1.00:0:1.22:1.25:1.22:0:1.28:1.88:0:0.38:0.45	29000	39700	29000	39700	1.00:1.37
611	17016	tr|F1MVK1|F1MVK1_BOVIN	1.83	2	2	1		62500	49300	69200	56300	55100	70200	73100	78200	95200	122000	124000	99500	72700	84600	76700	77100	75200	68800	62500	49300	69200	56300	55100	70200	73100	78200	95200	122000	124000	99500	72700	84600	76700	77100	75200	68800	0.80:0.63:0.89:0.72:0.70:0.90:0.94:1.00:1.22:1.56:1.59:1.27:0.93:1.08:0.98:0.99:0.96:0.88	67700	89000	67700	89000	1.00:1.32
611	17017	tr|E1BH06|E1BH06_BOVIN	1.83	2	2	1		62500	49300	69200	56300	55100	70200	73100	78200	95200	122000	124000	99500	72700	84600	76700	77100	75200	68800	62500	49300	69200	56300	55100	70200	73100	78200	95200	122000	124000	99500	72700	84600	76700	77100	75200	68800	0.80:0.63:0.89:0.72:0.70:0.90:0.94:1.00:1.22:1.56:1.59:1.27:0.93:1.08:0.98:0.99:0.96:0.88	67700	89000	67700	89000	1.00:1.32
412	646	ag|112229|CS60.230410CS6000079900015	1.79	2	1	1		71600	76700	67900	74300	87500	80000	115000	116000	123000	91800	96000	87100	77400	69800	82900	148000	148000	137000	71600	76700	67900	74300	87500	80000	115000	116000	123000	91800	96000	87100	77400	69800	82900	148000	148000	137000	0.62:0.66:0.59:0.64:0.75:0.69:0.99:1.00:1.06:0.79:0.83:0.75:0.67:0.60:0.72:1.27:1.27:1.18	90200	104000	90200	104000	1.00:1.15
304	659	ag|098964|CS60.230410CS600001590000F	1.79	32	4	4	Carbamidomethylation	288000	268000	277000	486000	596000	587000	768000	551000	645000	215000	215000	336000	622000	559000	498000	450000	504000	440000	275000	264000	253000	422000	522000	513000	701000	481000	567000	215000	215000	327000	537000	468000	417000	430000	441000	389000	0.57:0.55:0.53:0.88:1.09:1.07:1.46:1.00:1.18:0.45:0.45:0.68:1.12:0.97:0.87:0.89:0.92:0.81	496000	490000	444000	433000	1.00:0.98
617	860	ag|144988|Deer_XM_018065161.1	1.78	6	1	1		53100	89600	85800	47900	50600	50400	59500	62200	66100	0	0	0	169000	194000	198000	41900	41100	49200	53100	89600	85800	47900	50600	50400	59500	62200	66100	0	0	0	169000	194000	198000	41900	41100	49200	0.85:1.44:1.38:0.77:0.81:0.81:0.96:1.00:1.06:0:0:0:2.71:3.12:3.18:0.67:0.66:0.79	62800	116000	62800	116000	1.00:1.84
38	338	ag|101027|CS60.230410CS600000030004A	1.78	25	7	1	Carbamidomethylation; Pyro-glu from Q; Formylation; Deoxy; Ethylation	32500	42600	33400	27100	30100	30700	127000	115000	105000	0	0	0	0	0	4470	102000	108000	117000	32500	42600	33400	27100	30100	30700	127000	115000	105000	0	0	0	0	0	4470	102000	108000	117000	0.28:0.37:0.29:0.24:0.26:0.27:1.10:1.00:0.91:0:0:0:0:0:0.04:0.88:0.94:1.02	60500	83000	60500	83000	1.00:1.37
447	1301	ag|179797|Deer_XM_012158078.2	1.78	22	2	2	Carbamidomethylation; Deamidation (NQ); Hydroxylation	528000	211000	571000	424000	428000	449000	338000	478000	492000	228000	84800	186000	394000	384000	402000	98500	587000	748000	528000	211000	571000	424000	428000	449000	338000	478000	492000	228000	84800	186000	394000	384000	402000	98500	587000	748000	1.11:0.44:1.20:0.89:0.89:0.94:0.71:1.00:1.03:0.48:0.18:0.39:0.82:0.80:0.84:0.21:1.23:1.57	506000	498000	506000	498000	1.00:0.98
275	474	ag|044389|140304CS1901176200002	1.77	17	4	2	Carbamidomethylation; Deamidation (NQ); Hydroxylation	55500	64200	58300	101000	428000	140000	98400	95400	96400	25700	15900	18400	147000	314000	94500	0	0	262000	55500	64200	58300	101000	106000	134000	98400	95400	95400	25700	15900	18400	147000	148000	94500	0	0	10500	0.58:0.67:0.61:1.06:1.12:1.41:1.03:1.00:1.00:0.27:0.17:0.19:1.54:1.56:0.99:0:0:0.11	199000	285000	89900	76700	1.00:0.85
635	1847	ag|103632|CS60.230410CS6000045400015	1.75	6	1	1	Carbamidomethylation	21700	23100	22800	17100	14500	13300	26200	26200	22400	0	31200	24200	19600	0	35500	0	4120	0	21700	23100	22800	17100	14500	13300	26200	26200	22400	0	31200	24200	19600	0	35500	0	4120	0	0.83:0.88:0.87:0.66:0.56:0.51:1.00:1.00:0.86:0:1.19:0.92:0.75:0:1.36:0:0.16:0	20800	22900	20800	22900	1.00:1.10
635	1848	ag|044445|140304CS1901469300001	1.75	6	1	1	Carbamidomethylation	21700	23100	22800	17100	14500	13300	26200	26200	22400	0	31200	24200	19600	0	35500	0	4120	0	21700	23100	22800	17100	14500	13300	26200	26200	22400	0	31200	24200	19600	0	35500	0	4120	0	0.83:0.88:0.87:0.66:0.56:0.51:1.00:1.00:0.86:0:1.19:0.92:0.75:0:1.36:0:0.16:0	20800	22900	20800	22900	1.00:1.10
189	104	ag|046934|140304CS1901097000003	1.71	10	8	8	Carbamidomethylation	622000	632000	628000	428000	469000	483000	524000	513000	547000	270000	269000	277000	777000	793000	785000	149000	168000	153000	385000	404000	381000	259000	282000	289000	355000	355000	377000	264000	262000	271000	451000	477000	440000	105000	122000	103000	1.09:1.14:1.07:0.73:0.79:0.81:1.00:1.00:1.06:0.74:0.74:0.76:1.27:1.35:1.24:0.30:0.34:0.29	551000	656000	343000	382000	1.00:1.12
558	1040	ag|165334|Deer_XM_010811529.1	1.7	12	1	1		50600	46900	46600	43700	50000	51000	57200	58300	64000	17500	16600	14800	69600	74200	70600	39600	41200	35400	50600	46900	46600	43700	50000	51000	57200	58300	64000	17500	16600	14800	69600	74200	70600	39600	41200	35400	0.87:0.80:0.80:0.75:0.86:0.87:0.98:1.00:1.10:0.30:0.29:0.25:1.19:1.27:1.21:0.68:0.71:0.61	52000	42200	52000	42200	1.00:0.81
558	1041	ag|063042|CS60.230410CS6000011600002	1.7	12	1	1		50600	46900	46600	43700	50000	51000	57200	58300	64000	17500	16600	14800	69600	74200	70600	39600	41200	35400	50600	46900	46600	43700	50000	51000	57200	58300	64000	17500	16600	14800	69600	74200	70600	39600	41200	35400	0.87:0.80:0.80:0.75:0.86:0.87:0.98:1.00:1.10:0.30:0.29:0.25:1.19:1.27:1.21:0.68:0.71:0.61	52000	42200	52000	42200	1.00:0.81
558	1042	ag|185183|Deer_XM_004014418.2	1.7	12	1	1		50600	46900	46600	43700	50000	51000	57200	58300	64000	17500	16600	14800	69600	74200	70600	39600	41200	35400	50600	46900	46600	43700	50000	51000	57200	58300	64000	17500	16600	14800	69600	74200	70600	39600	41200	35400	0.87:0.80:0.80:0.75:0.86:0.87:0.98:1.00:1.10:0.30:0.29:0.25:1.19:1.27:1.21:0.68:0.71:0.61	52000	42200	52000	42200	1.00:0.81
558	1043	ag|172930|Deer_XM_012188865.2	1.7	12	1	1		50600	46900	46600	43700	50000	51000	57200	58300	64000	17500	16600	14800	69600	74200	70600	39600	41200	35400	50600	46900	46600	43700	50000	51000	57200	58300	64000	17500	16600	14800	69600	74200	70600	39600	41200	35400	0.87:0.80:0.80:0.75:0.86:0.87:0.98:1.00:1.10:0.30:0.29:0.25:1.19:1.27:1.21:0.68:0.71:0.61	52000	42200	52000	42200	1.00:0.81
350	1145	ag|139723|Deer_XM_005677583.3	1.7	17	2	2	Carbamidomethylation	191000	194000	154000	183000	241000	171000	203000	187000	206000	40400	62800	43600	350000	303000	246000	157000	148000	137000	191000	194000	154000	183000	241000	171000	203000	187000	206000	40400	62800	43600	350000	303000	246000	157000	148000	137000	1.02:1.04:0.82:0.98:1.29:0.92:1.09:1.00:1.10:0.22:0.34:0.23:1.87:1.62:1.32:0.84:0.79:0.73	192000	190000	192000	190000	1.00:0.99
403	1071	ag|161727|Deer_XM_015459022.1	1.66	22	2	1	Carbamidomethylation	88900	100000	79000	118000	129000	126000	199000	177000	167000	3260	0	0	108000	112000	116000	148000	172000	150000	88900	100000	79000	118000	129000	126000	199000	177000	167000	3260	0	0	108000	112000	116000	148000	172000	150000	0.50:0.57:0.44:0.67:0.73:0.71:1.12:1.00:0.94:0.02:0:0:0.61:0.63:0.65:0.83:0.97:0.84	132000	115000	132000	115000	1.00:0.88
403	1072	ag|145842|Deer_XM_005694476.3	1.66	16	2	1	Carbamidomethylation	88900	100000	79000	118000	129000	126000	199000	177000	167000	3260	0	0	108000	112000	116000	148000	172000	150000	88900	100000	79000	118000	129000	126000	199000	177000	167000	3260	0	0	108000	112000	116000	148000	172000	150000	0.50:0.57:0.44:0.67:0.73:0.71:1.12:1.00:0.94:0.02:0:0:0.61:0.63:0.65:0.83:0.97:0.84	132000	115000	132000	115000	1.00:0.88
309	17099	tr|A0A212CRW4|A0A212CRW4_CEREH	1.63	9	4	2		273000	230000	329000	770000	772000	763000	704000	732000	759000	2540	2560	0	648000	617000	582000	983000	956000	931000	231000	194000	273000	559000	565000	556000	515000	515000	534000	0	0	0	486000	472000	466000	644000	625000	621000	0.45:0.38:0.53:1.09:1.10:1.08:1.00:1.00:1.04:0:0:0:0.94:0.92:0.90:1.25:1.21:1.21	592000	728000	438000	552000	1.00:1.26
60	102	ag|005112|NODE_1301825	1.63	34	12	12	Deamidation (NQ)	5270000	5180000	5200000	5890000	6450000	6580000	7270000	7870000	7470000	1810000	1810000	1790000	5560000	5240000	5280000	9180000	9270000	9140000	2200000	2160000	2140000	2420000	2610000	2650000	2730000	3280000	2940000	860000	880000	882000	2520000	2550000	2510000	3430000	3440000	3390000	0.67:0.66:0.65:0.74:0.80:0.81:0.83:1.00:0.90:0.26:0.27:0.27:0.77:0.78:0.77:1.05:1.05:1.03	6430000	6280000	2570000	2280000	1.00:0.89
27	30	ag|156274|Deer_XM_015470037.1	1.62	28	27	2	Methylation(others)	104000	83400	82200	165000	177000	94000	163000	217000	190000	169000	190000	191000	193000	143000	157000	140000	141000	120000	89700	71900	82200	139000	153000	81300	110000	156000	137000	629	0	0	149000	143000	116000	84000	77400	65800	0.58:0.46:0.53:0.89:0.99:0.52:0.71:1.00:0.88:0.02:0:0:0.96:0.92:0.75:0.54:0.50:0.42	145000	192000	113000	90800	1.00:0.80
422	1016	ag|008871|NODE_1550959	1.59	6	2	2		89100	90900	98600	177000	176000	189000	161000	190000	233000	16700	37200	5050	129000	154000	139000	247000	156000	139000	89100	90900	98600	177000	176000	189000	161000	190000	233000	16700	37200	5050	129000	154000	139000	247000	156000	139000	0.47:0.48:0.52:0.93:0.93:0.99:0.85:1.00:1.23:0.09:0.20:0.03:0.68:0.81:0.73:1.30:0.82:0.73	177000	237000	177000	237000	1.00:1.34
422	1030	ag|145524|Deer_XM_005693314.3	1.59	6	2	2		89100	90900	98600	177000	176000	189000	161000	190000	233000	16700	37200	5050	129000	154000	139000	247000	156000	139000	89100	90900	98600	177000	176000	189000	161000	190000	233000	16700	37200	5050	129000	154000	139000	247000	156000	139000	0.47:0.48:0.52:0.93:0.93:0.99:0.85:1.00:1.23:0.09:0.20:0.03:0.68:0.81:0.73:1.30:0.82:0.73	177000	237000	177000	237000	1.00:1.34
422	1031	ag|161981|Deer_XM_010815811.2	1.59	6	2	2		89100	90900	98600	177000	176000	189000	161000	190000	233000	16700	37200	5050	129000	154000	139000	247000	156000	139000	89100	90900	98600	177000	176000	189000	161000	190000	233000	16700	37200	5050	129000	154000	139000	247000	156000	139000	0.47:0.48:0.52:0.93:0.93:0.99:0.85:1.00:1.23:0.09:0.20:0.03:0.68:0.81:0.73:1.30:0.82:0.73	177000	237000	177000	237000	1.00:1.34
422	1088	ag|068086|CS60.230410CS600012280000A	1.59	10	2	2		89100	90900	98600	177000	176000	189000	161000	190000	233000	16700	37200	5050	129000	154000	139000	247000	156000	139000	89100	90900	98600	177000	176000	189000	161000	190000	233000	16700	37200	5050	129000	154000	139000	247000	156000	139000	0.47:0.48:0.52:0.93:0.93:0.99:0.85:1.00:1.23:0.09:0.20:0.03:0.68:0.81:0.73:1.30:0.82:0.73	177000	237000	177000	237000	1.00:1.34
462	1542	ag|044335|140304CS1901019400001	1.59	13	1	1	Carbamidomethylation	82800	78800	87500	94700	100000	97700	170000	178000	175000	162000	212000	258000	231000	223000	216000	128000	113000	119000	82800	78800	87500	94700	100000	97700	170000	178000	175000	162000	212000	258000	231000	223000	216000	128000	113000	119000	0.46:0.44:0.49:0.53:0.56:0.55:0.95:1.00:0.98:0.91:1.19:1.44:1.30:1.25:1.21:0.72:0.63:0.67	118000	185000	118000	185000	1.00:1.56
648	2072	ag|051470|001120CECE007366HT_CS19	1.56	8	1	1		233000	232000	226000	217000	232000	217000	284000	275000	291000	80000	89100	83500	375000	278000	0	187000	145000	189000	233000	232000	226000	217000	232000	217000	284000	275000	291000	80000	89100	83500	375000	278000	0	187000	145000	189000	0.85:0.84:0.82:0.79:0.84:0.79:1.03:1.00:1.06:0.29:0.32:0.30:1.36:1.01:0:0.68:0.53:0.69	245000	178000	245000	178000	1.00:0.73
181	244	ag|099457|CS60.230410CS6000019900001	1.56	30	7	7	Carbamidomethylation	610000	641000	591000	687000	642000	732000	793000	867000	882000	195000	289000	243000	1180000	1170000	1160000	441000	440000	424000	396000	423000	384000	402000	424000	420000	490000	540000	534000	195000	208000	187000	680000	672000	668000	325000	315000	298000	0.73:0.78:0.71:0.74:0.78:0.78:0.91:1.00:0.99:0.36:0.38:0.35:1.26:1.24:1.24:0.60:0.58:0.55	727000	796000	446000	415000	1.00:0.93
108	106	ag|045699|140304CS1901107200001	1.54	35	9	7	Carbamidomethylation; Deamidation (NQ)	1770000	1800000	1790000	2480000	2660000	2690000	1590000	1620000	1630000	1420000	1420000	2640000	3740000	3910000	3820000	1440000	1740000	1660000	1280000	1340000	1300000	1720000	1820000	1920000	1170000	1140000	1170000	1090000	1090000	729000	2710000	2670000	2550000	1060000	1280000	1210000	1.12:1.17:1.14:1.51:1.60:1.69:1.03:1.00:1.02:0.95:0.96:0.64:2.38:2.35:2.24:0.93:1.13:1.06	2030000	2930000	1430000	1830000	1.00:1.28
606	1475	ag|150245|Deer_XM_018059472.1	1.54	2	1	1		0	15900	18000	14800	15400	15200	20300	0	23600	15400	14700	10600	21700	26200	43900	18400	19800	20900	0	15900	18000	14800	15400	15200	20300	0	23600	15400	14700	10600	21700	26200	43900	18400	19800	20900	-:64.00:64.00:64.00:64.00:64.00:64.00:-:64.00:64.00:64.00:64.00:64.00:64.00:64.00:64.00:64.00:64.00	17600	21300	17600	21300	1.00:1.21
606	1727	ag|108052|CS60.230410CS6000064500012	1.54	3	1	1		0	15900	18000	14800	15400	15200	20300	0	23600	15400	14700	10600	21700	26200	43900	18400	19800	20900	0	15900	18000	14800	15400	15200	20300	0	23600	15400	14700	10600	21700	26200	43900	18400	19800	20900	-:64.00:64.00:64.00:64.00:64.00:64.00:-:64.00:64.00:64.00:64.00:64.00:64.00:64.00:64.00:64.00:64.00	17600	21300	17600	21300	1.00:1.21
606	1753	ag|165308|Deer_XM_005216130.2	1.54	2	1	1		0	15900	18000	14800	15400	15200	20300	0	23600	15400	14700	10600	21700	26200	43900	18400	19800	20900	0	15900	18000	14800	15400	15200	20300	0	23600	15400	14700	10600	21700	26200	43900	18400	19800	20900	-:64.00:64.00:64.00:64.00:64.00:64.00:-:64.00:64.00:64.00:64.00:64.00:64.00:64.00:64.00:64.00:64.00	17600	21300	17600	21300	1.00:1.21
250	805	ag|089093|CS60.230410CS6000014100007	1.52	35	3	3		945000	896000	959000	1160000	1210000	1260000	1210000	1260000	1290000	1150000	1170000	1130000	1610000	1640000	1560000	1040000	1000000	983000	945000	896000	959000	1160000	1210000	1260000	1210000	1260000	1290000	1150000	1170000	1130000	1610000	1640000	1560000	1040000	1000000	983000	0.75:0.71:0.76:0.91:0.96:1.00:0.96:1.00:1.02:0.91:0.92:0.90:1.28:1.29:1.24:0.82:0.79:0.78	1130000	1250000	1130000	1250000	1.00:1.11
250	806	ag|189445|Deer_XM_019977488.1	1.52	34	3	3		945000	896000	959000	1160000	1210000	1260000	1210000	1260000	1290000	1150000	1170000	1130000	1610000	1640000	1560000	1040000	1000000	983000	945000	896000	959000	1160000	1210000	1260000	1210000	1260000	1290000	1150000	1170000	1130000	1610000	1640000	1560000	1040000	1000000	983000	0.75:0.71:0.76:0.91:0.96:1.00:0.96:1.00:1.02:0.91:0.92:0.90:1.28:1.29:1.24:0.82:0.79:0.78	1130000	1250000	1130000	1250000	1.00:1.11
250	808	ag|112955|CS60.230410CS6000008200004	1.52	23	3	3		945000	896000	959000	1160000	1210000	1260000	1210000	1260000	1290000	1150000	1170000	1130000	1610000	1640000	1560000	1040000	1000000	983000	945000	896000	959000	1160000	1210000	1260000	1210000	1260000	1290000	1150000	1170000	1130000	1610000	1640000	1560000	1040000	1000000	983000	0.75:0.71:0.76:0.91:0.96:1.00:0.96:1.00:1.02:0.91:0.92:0.90:1.28:1.29:1.24:0.82:0.79:0.78	1130000	1250000	1130000	1250000	1.00:1.11
250	809	ag|099110|CS60.230410CS6000016600002	1.52	22	3	3		945000	896000	959000	1160000	1210000	1260000	1210000	1260000	1290000	1150000	1170000	1130000	1610000	1640000	1560000	1040000	1000000	983000	945000	896000	959000	1160000	1210000	1260000	1210000	1260000	1290000	1150000	1170000	1130000	1610000	1640000	1560000	1040000	1000000	983000	0.75:0.71:0.76:0.91:0.96:1.00:0.96:1.00:1.02:0.91:0.92:0.90:1.28:1.29:1.24:0.82:0.79:0.78	1130000	1250000	1130000	1250000	1.00:1.11
250	810	ag|135997|Deer_XM_018051446.1	1.52	22	3	3		945000	896000	959000	1160000	1210000	1260000	1210000	1260000	1290000	1150000	1170000	1130000	1610000	1640000	1560000	1040000	1000000	983000	945000	896000	959000	1160000	1210000	1260000	1210000	1260000	1290000	1150000	1170000	1130000	1610000	1640000	1560000	1040000	1000000	983000	0.75:0.71:0.76:0.91:0.96:1.00:0.96:1.00:1.02:0.91:0.92:0.90:1.28:1.29:1.24:0.82:0.79:0.78	1130000	1250000	1130000	1250000	1.00:1.11
250	811	ag|112952|CS60.230410CS6000008200001	1.52	19	3	3		945000	896000	959000	1160000	1210000	1260000	1210000	1260000	1290000	1150000	1170000	1130000	1610000	1640000	1560000	1040000	1000000	983000	945000	896000	959000	1160000	1210000	1260000	1210000	1260000	1290000	1150000	1170000	1130000	1610000	1640000	1560000	1040000	1000000	983000	0.75:0.71:0.76:0.91:0.96:1.00:0.96:1.00:1.02:0.91:0.92:0.90:1.28:1.29:1.24:0.82:0.79:0.78	1130000	1250000	1130000	1250000	1.00:1.11
250	812	ag|050150|140304CS1901022200003	1.52	13	3	3		945000	896000	959000	1160000	1210000	1260000	1210000	1260000	1290000	1150000	1170000	1130000	1610000	1640000	1560000	1040000	1000000	983000	945000	896000	959000	1160000	1210000	1260000	1210000	1260000	1290000	1150000	1170000	1130000	1610000	1640000	1560000	1040000	1000000	983000	0.75:0.71:0.76:0.91:0.96:1.00:0.96:1.00:1.02:0.91:0.92:0.90:1.28:1.29:1.24:0.82:0.79:0.78	1130000	1250000	1130000	1250000	1.00:1.11
250	813	ag|089091|CS60.230410CS6000014100005	1.52	12	3	3		945000	896000	959000	1160000	1210000	1260000	1210000	1260000	1290000	1150000	1170000	1130000	1610000	1640000	1560000	1040000	1000000	983000	945000	896000	959000	1160000	1210000	1260000	1210000	1260000	1290000	1150000	1170000	1130000	1610000	1640000	1560000	1040000	1000000	983000	0.75:0.71:0.76:0.91:0.96:1.00:0.96:1.00:1.02:0.91:0.92:0.90:1.28:1.29:1.24:0.82:0.79:0.78	1130000	1250000	1130000	1250000	1.00:1.11
250	815	ag|089090|CS60.230410CS6000014100004	1.52	10	3	3		945000	896000	959000	1160000	1210000	1260000	1210000	1260000	1290000	1150000	1170000	1130000	1610000	1640000	1560000	1040000	1000000	983000	945000	896000	959000	1160000	1210000	1260000	1210000	1260000	1290000	1150000	1170000	1130000	1610000	1640000	1560000	1040000	1000000	983000	0.75:0.71:0.76:0.91:0.96:1.00:0.96:1.00:1.02:0.91:0.92:0.90:1.28:1.29:1.24:0.82:0.79:0.78	1130000	1250000	1130000	1250000	1.00:1.11
384	527	ag|102823|CS60.230410CS6000004100002	1.52	5	1	1		0	0	0	38200	38700	38600	7160	5340	4860	2390	8980	0	21700	8300	33500	1380	6760	11200	0	0	0	38200	38700	38600	7160	5340	4860	2390	8980	0	21700	8300	33500	1380	6760	11200	0:0:0:7.15:7.26:7.23:1.34:1.00:0.91:0.45:1.68:0:4.06:1.55:6.28:0.26:1.27:2.11	22100	11800	22100	11800	1.00:0.53
110	185	ag|146055|Deer_XM_018063545.1	1.49	19	8	2	Carbamidomethylation; Deamidation (NQ); Dehydration; Carbamylation	372000	385000	384000	264000	211000	293000	464000	558000	597000	70700	71300	24300	365000	350000	368000	537000	522000	505000	372000	385000	384000	264000	211000	293000	464000	558000	597000	70700	71300	24300	365000	350000	368000	537000	522000	505000	0.67:0.69:0.69:0.47:0.38:0.52:0.83:1.00:1.07:0.13:0.13:0.04:0.65:0.63:0.66:0.96:0.94:0.90	401000	447000	401000	447000	1.00:1.11
192	16970	tr|A0A212DD04|A0A212DD04_CEREH	1.49	24	10	4	Carbamidomethylation; Deamidation (NQ); Dehydration	890000	909000	900000	629000	667000	694000	1170000	1250000	1270000	732000	749000	764000	733000	693000	491000	1650000	1640000	1600000	722000	715000	713000	480000	511000	535000	1170000	1250000	1230000	732000	749000	764000	523000	498000	300000	1620000	1610000	1590000	0.58:0.57:0.57:0.38:0.41:0.43:0.93:1.00:0.98:0.58:0.60:0.61:0.42:0.40:0.24:1.29:1.28:1.27	964000	1070000	813000	962000	1.00:1.18
370	183	ag|144349|Deer_XM_005695800.3	1.47	1	1	1		25400	25600	23200	49500	53300	49100	58200	2070	0	12900	13600	12700	0	66500	67900	7150	0	6510	25400	25600	23200	49500	53300	49100	58200	2070	0	12900	13600	12700	0	66500	67900	7150	0	6510	12.30:12.38:11.25:23.98:25.78:23.74:28.17:1.00:0:6.22:6.61:6.15:0:32.19:32.88:3.46:0:3.15	35800	26800	35800	26800	1.00:0.75
480	820	ag|053461|140304CS1901060900001	1.47	9	1	1		93500	91500	94300	97800	99500	106000	131000	140000	142000	12900	12100	13300	233000	224000	206000	61500	58200	60500	93500	91500	94300	97800	99500	106000	131000	140000	142000	12900	12100	13300	233000	224000	206000	61500	58200	60500	0.67:0.65:0.67:0.70:0.71:0.76:0.94:1.00:1.02:0.09:0.09:0.09:1.67:1.60:1.47:0.44:0.42:0.43	111000	97900	111000	97900	1.00:0.88
161	330	ag|054060|140304CS1901537300001	1.44	43	6	6	Carbamidomethylation	983000	971000	977000	1090000	1200000	1060000	959000	981000	990000	573000	539000	562000	1560000	1440000	1490000	678000	528000	613000	808000	800000	802000	743000	829000	849000	880000	916000	919000	512000	477000	495000	1270000	1190000	1220000	599000	446000	534000	0.88:0.87:0.88:0.81:0.91:0.93:0.96:1.00:1.00:0.56:0.52:0.54:1.39:1.30:1.34:0.65:0.49:0.58	1100000	965000	839000	750000	1.00:0.89
161	331	ag|109990|CS60.230410CS6000071800008	1.44	41	6	6	Carbamidomethylation	983000	971000	977000	1090000	1200000	1060000	959000	981000	990000	573000	539000	562000	1560000	1440000	1490000	678000	528000	613000	808000	800000	802000	743000	829000	849000	880000	916000	919000	512000	477000	495000	1270000	1190000	1220000	599000	446000	534000	0.88:0.87:0.88:0.81:0.91:0.93:0.96:1.00:1.00:0.56:0.52:0.54:1.39:1.30:1.34:0.65:0.49:0.58	1100000	965000	839000	750000	1.00:0.89
1	4	ag|173667|Deer_XM_015098715.1	1.44	64	56	7	Carbamidomethylation; Deamidation (NQ); Pyro-glu from Q; Hydroxylation; Acetylation (N-term); 11 more	16800000	15800000	15300000	10900000	11500000	11800000	12900000	13200000	13900000	18200000	18600000	18800000	12300000	12200000	11600000	20300000	19900000	19500000	11000000	11200000	10700000	6170000	6520000	6660000	8150000	8330000	8840000	9840000	10000000	10100000	6830000	6770000	6710000	12400000	12200000	11900000	1.32:1.34:1.28:0.74:0.78:0.80:0.98:1.00:1.06:1.18:1.20:1.21:0.82:0.81:0.80:1.49:1.46:1.43	14700000	18200000	8620000	9630000	1.00:1.12
224	16965	tr|A0A212C7P2|A0A212C7P2_CEREH	1.43	14	7	7	Carbamidomethylation	501000	503000	486000	418000	488000	514000	946000	1110000	1190000	645000	653000	716000	256000	379000	273000	1130000	1040000	1150000	365000	382000	343000	312000	324000	356000	660000	657000	693000	428000	405000	415000	139000	218000	204000	648000	575000	625000	0.56:0.58:0.52:0.48:0.49:0.54:1.00:1.00:1.05:0.65:0.62:0.63:0.21:0.33:0.31:0.99:0.87:0.95	780000	783000	455000	437000	1.00:0.96
425	1054	ag|105837|CS60.230410CS6000056200012	1.42	7	1	1	Deamidation (NQ)	78500	87900	85900	133000	102000	125000	50000	103000	128000	351000	408000	322000	278000	0	0	74000	122000	0	78500	87900	85900	133000	102000	125000	0	0	128000	351000	408000	322000	0	0	0	12500	122000	0	64.00:64.00:64.00:64.00:64.00:64.00:-:-:64.00:64.00:64.00:64.00:-:-:-:64.00:64.00:-	182000	413000	106000	243000	1.00:2.30
614	17133	tr|G5E619|G5E619_BOVIN	1.38	6	1	1	Carbamidomethylation	95300	90400	93400	83200	66600	92000	77200	75800	66400	29400	28300	31800	110000	84600	95900	39300	44300	34500	95300	90400	93400	83200	66600	92000	77200	75800	66400	29400	28300	31800	110000	84600	95900	39300	44300	34500	1.26:1.19:1.23:1.10:0.88:1.21:1.02:1.00:0.88:0.39:0.37:0.42:1.45:1.12:1.27:0.52:0.58:0.45	82300	55300	82300	55300	1.00:0.67
277	16977	tr|A0A212DAA2|A0A212DAA2_CEREH	1.38	26	15	3	Carbamidomethylation	546000	583000	536000	546000	574000	599000	1000000	1030000	1060000	894000	901000	813000	232000	228000	236000	860000	844000	830000	546000	583000	536000	546000	574000	599000	1000000	1030000	1060000	894000	901000	813000	232000	228000	236000	860000	844000	830000	0.53:0.56:0.52:0.53:0.56:0.58:0.97:1.00:1.03:0.87:0.87:0.79:0.22:0.22:0.23:0.83:0.82:0.80	807000	753000	807000	753000	1.00:0.93
182	335	ag|001905|NODE_1117864	1.37	24	4	1		492000	518000	432000	629000	675000	688000	765000	749000	837000	274000	354000	320000	282000	299000	287000	674000	756000	695000	492000	518000	432000	629000	675000	688000	765000	749000	837000	274000	354000	320000	282000	299000	287000	674000	756000	695000	0.66:0.69:0.58:0.84:0.90:0.92:1.02:1.00:1.12:0.37:0.47:0.43:0.38:0.40:0.38:0.90:1.01:0.93	643000	438000	643000	438000	1.00:0.68
168	119	ag|045839|140304CS1901088000001	1.36	9	5	5		412000	383000	343000	679000	736000	771000	872000	951000	937000	402000	343000	358000	1030000	965000	1080000	322000	278000	214000	321000	300000	265000	465000	483000	513000	534000	609000	581000	375000	318000	328000	647000	609000	709000	212000	187000	176000	0.53:0.49:0.43:0.76:0.79:0.84:0.88:1.00:0.95:0.62:0.52:0.54:1.06:1.00:1.16:0.35:0.31:0.29	742000	706000	518000	497000	1.00:0.96
120	64	ag|136268|Deer_XM_018050944.1	1.35	27	9	1	Carbamidomethylation; Deamidation (NQ)	177000	181000	148000	140000	208000	177000	293000	294000	309000	167000	169000	159000	121000	121000	133000	233000	231000	230000	177000	181000	148000	140000	208000	177000	293000	294000	309000	167000	169000	159000	121000	121000	133000	233000	231000	230000	0.60:0.61:0.51:0.48:0.71:0.60:1.00:1.00:1.05:0.57:0.58:0.54:0.41:0.41:0.45:0.79:0.79:0.78	214000	174000	214000	174000	1.00:0.81
285	655	ag|173540|Deer_XM_004013066.3	1.34	18	3	3		431000	464000	455000	489000	498000	497000	693000	745000	810000	762000	785000	778000	622000	594000	589000	457000	523000	524000	431000	464000	455000	489000	498000	497000	693000	745000	810000	762000	785000	778000	622000	594000	589000	457000	523000	524000	0.58:0.62:0.61:0.66:0.67:0.67:0.93:1.00:1.09:1.02:1.05:1.04:0.84:0.80:0.79:0.61:0.70:0.70	565000	626000	565000	626000	1.00:1.11
285	656	ag|161782|Deer_XM_005221011.3	1.34	16	3	3		431000	464000	455000	489000	498000	497000	693000	745000	810000	762000	785000	778000	622000	594000	589000	457000	523000	524000	431000	464000	455000	489000	498000	497000	693000	745000	810000	762000	785000	778000	622000	594000	589000	457000	523000	524000	0.58:0.62:0.61:0.66:0.67:0.67:0.93:1.00:1.09:1.02:1.05:1.04:0.84:0.80:0.79:0.61:0.70:0.70	565000	626000	565000	626000	1.00:1.11
461	1121	ag|110933|CS60.230410CS6000074900021	1.34	8	2	2		121000	118000	132000	83400	89100	90500	161000	176000	177000	0	9770	11400	245000	239000	252000	69700	88600	76000	121000	118000	132000	83400	89100	90500	161000	176000	177000	0	9770	11400	245000	239000	252000	69700	88600	76000	0.69:0.67:0.75:0.47:0.51:0.52:0.92:1.00:1.01:0:0.06:0.06:1.39:1.36:1.43:0.40:0.50:0.43	128000	146000	128000	146000	1.00:1.15
261	482	ag|050118|140304CS1901271400001	1.29	24	4	4	Carbamidomethylation	289000	269000	283000	295000	309000	323000	352000	337000	420000	84400	82100	84400	678000	698000	672000	272000	271000	283000	289000	269000	283000	268000	293000	292000	352000	337000	420000	84400	82100	84400	678000	669000	672000	272000	271000	283000	0.86:0.80:0.84:0.79:0.87:0.87:1.04:1.00:1.24:0.25:0.24:0.25:2.01:1.98:1.99:0.81:0.80:0.84	336000	418000	311000	389000	1.00:1.25
456	1006	ag|105096|CS60.230410CS6000052800005	1.29	5	2	2		119000	126000	115000	140000	136000	147000	153000	131000	172000	88600	103000	99800	177000	191000	159000	113000	106000	23900	119000	126000	115000	140000	136000	147000	153000	131000	172000	88600	103000	99800	177000	191000	159000	113000	106000	23900	0.91:0.97:0.88:1.07:1.04:1.12:1.17:1.00:1.32:0.68:0.79:0.76:1.35:1.46:1.22:0.86:0.81:0.18	138000	137000	138000	137000	1.00:1.00
407	802	ag|146604|Deer_XM_018062680.1	1.26	15	2	2	Carbamidomethylation	81500	64600	86600	107000	117000	119000	90700	117000	116000	19900	26500	0	193000	192000	192000	156000	152000	135000	81500	64600	86600	107000	117000	119000	90700	117000	116000	19900	26500	0	193000	192000	192000	156000	152000	135000	0.70:0.55:0.74:0.91:1.00:1.02:0.77:1.00:0.99:0.17:0.23:0:1.65:1.64:1.64:1.33:1.30:1.15	105000	158000	105000	158000	1.00:1.51
457	1416	ag|062091|CS60.230410CS600011410001A	1.25	11	1	1		152000	173000	159000	149000	149000	153000	191000	195000	198000	234000	235000	232000	256000	257000	262000	238000	229000	227000	152000	173000	159000	149000	149000	153000	191000	195000	198000	234000	235000	232000	256000	257000	262000	238000	229000	227000	0.78:0.89:0.81:0.76:0.77:0.79:0.98:1.00:1.02:1.20:1.21:1.19:1.31:1.32:1.35:1.22:1.18:1.17	169000	241000	169000	241000	1.00:1.43
457	1417	ag|043858|140304CS1901767700001	1.25	9	1	1		152000	173000	159000	149000	149000	153000	191000	195000	198000	234000	235000	232000	256000	257000	262000	238000	229000	227000	152000	173000	159000	149000	149000	153000	191000	195000	198000	234000	235000	232000	256000	257000	262000	238000	229000	227000	0.78:0.89:0.81:0.76:0.77:0.79:0.98:1.00:1.02:1.20:1.21:1.19:1.31:1.32:1.35:1.22:1.18:1.17	169000	241000	169000	241000	1.00:1.43
457	1658	ag|168526|Deer_NM_001077969.2	1.25	11	1	1		152000	173000	159000	149000	149000	153000	191000	195000	198000	234000	235000	232000	256000	257000	262000	238000	229000	227000	152000	173000	159000	149000	149000	153000	191000	195000	198000	234000	235000	232000	256000	257000	262000	238000	229000	227000	0.78:0.89:0.81:0.76:0.77:0.79:0.98:1.00:1.02:1.20:1.21:1.19:1.31:1.32:1.35:1.22:1.18:1.17	169000	241000	169000	241000	1.00:1.43
442	17041	sp|Q2KJF1|A1BG_BOVIN	1.25	11	5	1		133000	137000	135000	97400	83100	81500	220000	237000	254000	246000	255000	257000	95000	88300	87100	320000	312000	300000	133000	137000	135000	97400	83100	81500	220000	237000	254000	246000	255000	257000	95000	88300	87100	320000	312000	300000	0.56:0.58:0.57:0.41:0.35:0.34:0.93:1.00:1.07:1.04:1.08:1.09:0.40:0.37:0.37:1.35:1.32:1.27	153000	218000	153000	218000	1.00:1.42
193	127	ag|047576|140304CS1901262700001	1.23	19	6	1	Deamidation (NQ)	64300	57800	63500	38500	42200	37600	91900	81500	88700	0	71300	69800	193000	188000	204000	44100	0	37600	64300	57800	63500	38500	42200	37600	91900	81500	88700	0	71300	69800	193000	188000	204000	44100	0	37600	0.79:0.71:0.78:0.47:0.52:0.46:1.13:1.00:1.09:0:0.87:0.86:2.37:2.31:2.51:0.54:0:0.46	62900	115000	62900	115000	1.00:1.84
476	994	ag|024460|NODE_2405892	1.21	2	1	1		65900	85000	65700	87100	96200	0	127000	77600	85700	60100	62500	68300	48400	55900	57100	66300	78300	74500	65900	85000	65700	87100	96200	0	127000	77600	85700	60100	62500	68300	48400	55900	57100	66300	78300	74500	0.85:1.10:0.85:1.12:1.24:0:1.64:1.00:1.10:0.78:0.81:0.88:0.62:0.72:0.74:0.86:1.01:0.96	86300	63500	86300	63500	1.00:0.74
437	857	ag|048383|140304CS1900109100001	1.19	2	1	1		113000	119000	114000	133000	141000	144000	156000	156000	164000	30900	30400	31700	304000	298000	274000	140000	130000	135000	113000	119000	114000	133000	141000	144000	156000	156000	164000	30900	30400	31700	304000	298000	274000	140000	130000	135000	0.72:0.76:0.73:0.85:0.90:0.92:1.00:1.00:1.05:0.20:0.19:0.20:1.94:1.91:1.75:0.89:0.83:0.86	138000	153000	138000	153000	1.00:1.11
550	1723	ag|056483|CS60.230410CS600010320002A	1.16	8	1	1		24900	63700	41800	0	0	5560	71600	57400	72500	86600	83500	86600	0	0	3600	74100	75400	65200	24900	63700	41800	0	0	5560	71600	57400	72500	86600	83500	86600	0	0	3600	74100	75400	65200	0.43:1.11:0.73:0:0:0.10:1.25:1.00:1.26:1.51:1.46:1.51:0:0:0.06:1.29:1.31:1.14	48200	67900	48200	67900	1.00:1.41
35	21	ag|151585|Deer_XM_005687493.3	1.12	36	20	1	Carbamidomethylation; Deamidation (NQ)	101000	99300	101000	67200	68300	67500	31400	34400	33100	18100	19300	18800	106000	102000	102000	49300	58600	48800	101000	99300	101000	67200	68300	67500	31400	34400	33100	18100	19300	18800	106000	102000	102000	49300	58600	48800	2.94:2.89:2.95:1.95:1.98:1.96:0.91:1.00:0.96:0.52:0.56:0.55:3.08:2.98:2.96:1.43:1.70:1.42	67100	58100	67100	58100	1.00:0.87
517	1397	ag|107218|CS60.230410CS6000061600015	1.12	6	1	1		48600	47800	38200	39300	42900	40600	53200	56000	58800	63900	63300	67600	100000	101000	104000	30100	30800	30200	48600	47800	38200	39300	42900	40600	53200	56000	58800	63900	63300	67600	100000	101000	104000	30100	30800	30200	0.87:0.85:0.68:0.70:0.77:0.73:0.95:1.00:1.05:1.14:1.13:1.21:1.79:1.80:1.85:0.54:0.55:0.54	47300	65600	47300	65600	1.00:1.39
537	1360	ag|054931|CS60.230410CS6000100400025	1.11	5	1	1	Carbamidomethylation	0	0	41300	53000	77700	89800	58700	96900	89500	0	0	0	122000	98000	85000	0	59400	0	0	0	41300	53000	77700	89800	58700	96900	89500	0	0	0	122000	98000	85000	0	59400	0	0:0:0.43:0.55:0.80:0.93:0.61:1.00:0.92:0:0:0:1.26:1.01:0.88:0:0.61:0	72400	91200	72400	91200	1.00:1.26
537	1361	ag|143143|Deer_XM_018043394.1	1.11	5	1	1	Carbamidomethylation	0	0	41300	53000	77700	89800	58700	96900	89500	0	0	0	122000	98000	85000	0	59400	0	0	0	41300	53000	77700	89800	58700	96900	89500	0	0	0	122000	98000	85000	0	59400	0	0:0:0.43:0.55:0.80:0.93:0.61:1.00:0.92:0:0:0:1.26:1.01:0.88:0:0.61:0	72400	91200	72400	91200	1.00:1.26
537	1405	ag|135172|Deer_XM_018055488.1	1.11	9	1	1	Carbamidomethylation	0	0	41300	53000	77700	89800	58700	96900	89500	0	0	0	122000	98000	85000	0	59400	0	0	0	41300	53000	77700	89800	58700	96900	89500	0	0	0	122000	98000	85000	0	59400	0	0:0:0.43:0.55:0.80:0.93:0.61:1.00:0.92:0:0:0:1.26:1.01:0.88:0:0.61:0	72400	91200	72400	91200	1.00:1.26
537	1406	ag|109989|CS60.230410CS6000071800007	1.11	6	1	1	Carbamidomethylation	0	0	41300	53000	77700	89800	58700	96900	89500	0	0	0	122000	98000	85000	0	59400	0	0	0	41300	53000	77700	89800	58700	96900	89500	0	0	0	122000	98000	85000	0	59400	0	0:0:0.43:0.55:0.80:0.93:0.61:1.00:0.92:0:0:0:1.26:1.01:0.88:0:0.61:0	72400	91200	72400	91200	1.00:1.26
537	1530	ag|171753|Deer_XM_004017367.3	1.11	9	1	1	Carbamidomethylation	0	0	41300	53000	77700	89800	58700	96900	89500	0	0	0	122000	98000	85000	0	59400	0	0	0	41300	53000	77700	89800	58700	96900	89500	0	0	0	122000	98000	85000	0	59400	0	0:0:0.43:0.55:0.80:0.93:0.61:1.00:0.92:0:0:0:1.26:1.01:0.88:0:0.61:0	72400	91200	72400	91200	1.00:1.26
537	1531	ag|183551|Deer_XM_012110192.2	1.11	9	1	1	Carbamidomethylation	0	0	41300	53000	77700	89800	58700	96900	89500	0	0	0	122000	98000	85000	0	59400	0	0	0	41300	53000	77700	89800	58700	96900	89500	0	0	0	122000	98000	85000	0	59400	0	0:0:0.43:0.55:0.80:0.93:0.61:1.00:0.92:0:0:0:1.26:1.01:0.88:0:0.61:0	72400	91200	72400	91200	1.00:1.26
537	1532	ag|107672|CS60.230410CS600006320000D	1.11	7	1	1	Carbamidomethylation	0	0	41300	53000	77700	89800	58700	96900	89500	0	0	0	122000	98000	85000	0	59400	0	0	0	41300	53000	77700	89800	58700	96900	89500	0	0	0	122000	98000	85000	0	59400	0	0:0:0.43:0.55:0.80:0.93:0.61:1.00:0.92:0:0:0:1.26:1.01:0.88:0:0.61:0	72400	91200	72400	91200	1.00:1.26
460	1093	ag|045145|140304CS1900010100004	1.09	9	1	1		85600	82000	79600	60900	135000	100000	91300	44300	51500	0	0	0	182000	22100	181000	49200	46200	49400	85600	82000	79600	60900	135000	100000	91300	44300	51500	0	0	0	182000	22100	181000	49200	46200	49400	1.93:1.85:1.80:1.37:3.05:2.26:2.06:1.00:1.16:0:0:0:4.10:0.50:4.08:1.11:1.04:1.11	81200	88200	81200	88200	1.00:1.09
460	1094	ag|188738|Deer_XM_019982065.1	1.09	8	1	1		85600	82000	79600	60900	135000	100000	91300	44300	51500	0	0	0	182000	22100	181000	49200	46200	49400	85600	82000	79600	60900	135000	100000	91300	44300	51500	0	0	0	182000	22100	181000	49200	46200	49400	1.93:1.85:1.80:1.37:3.05:2.26:2.06:1.00:1.16:0:0:0:4.10:0.50:4.08:1.11:1.04:1.11	81200	88200	81200	88200	1.00:1.09
460	1095	ag|118519|CS60.230410CS6000097700003	1.09	8	1	1		85600	82000	79600	60900	135000	100000	91300	44300	51500	0	0	0	182000	22100	181000	49200	46200	49400	85600	82000	79600	60900	135000	100000	91300	44300	51500	0	0	0	182000	22100	181000	49200	46200	49400	1.93:1.85:1.80:1.37:3.05:2.26:2.06:1.00:1.16:0:0:0:4.10:0.50:4.08:1.11:1.04:1.11	81200	88200	81200	88200	1.00:1.09
460	1096	ag|105720|CS60.230410CS6000055800007	1.09	7	1	1		85600	82000	79600	60900	135000	100000	91300	44300	51500	0	0	0	182000	22100	181000	49200	46200	49400	85600	82000	79600	60900	135000	100000	91300	44300	51500	0	0	0	182000	22100	181000	49200	46200	49400	1.93:1.85:1.80:1.37:3.05:2.26:2.06:1.00:1.16:0:0:0:4.10:0.50:4.08:1.11:1.04:1.11	81200	88200	81200	88200	1.00:1.09
460	1097	ag|105719|CS60.230410CS6000055800006	1.09	6	1	1		85600	82000	79600	60900	135000	100000	91300	44300	51500	0	0	0	182000	22100	181000	49200	46200	49400	85600	82000	79600	60900	135000	100000	91300	44300	51500	0	0	0	182000	22100	181000	49200	46200	49400	1.93:1.85:1.80:1.37:3.05:2.26:2.06:1.00:1.16:0:0:0:4.10:0.50:4.08:1.11:1.04:1.11	81200	88200	81200	88200	1.00:1.09
176	132	ag|142495|Deer_XM_013974027.2	1.09	14	6	1	Carbamidomethylation	65700	68500	63400	107000	116000	121000	208000	197000	227000	87400	90800	96800	139000	134000	138000	126000	117000	113000	65700	68500	63400	107000	116000	121000	208000	197000	227000	87400	90800	96800	139000	134000	138000	126000	117000	113000	0.33:0.35:0.32:0.55:0.59:0.62:1.06:1.00:1.15:0.44:0.46:0.49:0.71:0.68:0.70:0.64:0.59:0.58	130000	116000	130000	116000	1.00:0.89
356	606	ag|166137|Deer_NM_001046092.2	1.08	25	3	2		29200	17400	33000	80500	87600	97000	87100	86400	95700	4890	49100	13500	98500	103000	92600	39800	46600	49800	29200	17400	33000	80500	87600	97000	87100	86400	95700	4890	49100	13500	98500	103000	92600	39800	46600	49800	0.34:0.20:0.38:0.93:1.01:1.12:1.01:1.00:1.11:0.06:0.57:0.16:1.14:1.19:1.07:0.46:0.54:0.58	70000	60900	70000	60900	1.00:0.87
549	17057	tr|A0A212CCX6|A0A212CCX6_CEREH	1.04	14	1	1		134000	138000	124000	93100	98400	85800	119000	122000	143000	33200	27000	0	133000	63700	137000	133000	124000	126000	134000	138000	124000	93100	98400	85800	119000	122000	143000	33200	27000	0	133000	63700	137000	133000	124000	126000	1.10:1.13:1.02:0.77:0.81:0.70:0.98:1.00:1.17:0.27:0.22:0:1.09:0.52:1.13:1.09:1.02:1.04	117000	97200	117000	97200	1.00:0.83
84	99	ag|050838|140304CS1901508400001	1.04	34	12	12	Carbamidomethylation; Deamidation (NQ); 2-amino-3-oxo-butanoic_acid	3390000	3490000	3300000	2950000	3100000	3200000	2900000	2930000	3180000	1920000	1910000	1940000	3080000	3040000	2970000	2650000	2460000	2570000	1030000	1120000	1020000	865000	891000	921000	940000	919000	1040000	888000	895000	887000	932000	1020000	915000	866000	830000	883000	1.12:1.22:1.11:0.94:0.97:1.00:1.02:1.00:1.13:0.97:0.97:0.97:1.01:1.11:1.00:0.94:0.90:0.96	3160000	2640000	972000	902000	1.00:0.93
663	1713	ag|036289|NODE_661715	1.04	17	1	1		21200	0	26700	27600	32100	36700	54200	54100	51300	0	0	0	126000	118000	110000	23900	21200	15200	21200	0	26700	27600	32100	36700	54200	54100	51300	0	0	0	126000	118000	110000	23900	21200	15200	0.39:0:0.49:0.51:0.59:0.68:1.00:1.00:0.95:0:0:0:2.32:2.17:2.03:0.44:0.39:0.28	38000	68900	38000	68900	1.00:1.81
663	1714	ag|046795|140304CS1901556600001	1.04	12	1	1		21200	0	26700	27600	32100	36700	54200	54100	51300	0	0	0	126000	118000	110000	23900	21200	15200	21200	0	26700	27600	32100	36700	54200	54100	51300	0	0	0	126000	118000	110000	23900	21200	15200	0.39:0:0.49:0.51:0.59:0.68:1.00:1.00:0.95:0:0:0:2.32:2.17:2.03:0.44:0.39:0.28	38000	68900	38000	68900	1.00:1.81
663	1715	ag|119363|CS60.230410CS600009940001C	1.04	11	1	1		21200	0	26700	27600	32100	36700	54200	54100	51300	0	0	0	126000	118000	110000	23900	21200	15200	21200	0	26700	27600	32100	36700	54200	54100	51300	0	0	0	126000	118000	110000	23900	21200	15200	0.39:0:0.49:0.51:0.59:0.68:1.00:1.00:0.95:0:0:0:2.32:2.17:2.03:0.44:0.39:0.28	38000	68900	38000	68900	1.00:1.81
654	1856	ag|144213|Deer_XM_018067197.1	1.01	8	1	1		61700	47800	62500	131000	119000	132000	134000	137000	146000	0	187000	196000	5550	284000	243000	129000	138000	125000	61700	47800	62500	131000	119000	132000	134000	137000	146000	0	187000	196000	5550	284000	243000	129000	138000	125000	0.45:0.35:0.46:0.96:0.87:0.96:0.98:1.00:1.07:0:1.37:1.43:0.04:2.08:1.78:0.94:1.01:0.92	108000	163000	108000	163000	1.00:1.51
654	1857	ag|188160|Deer_XM_019984648.1	1.01	6	1	1		61700	47800	62500	131000	119000	132000	134000	137000	146000	0	187000	196000	5550	284000	243000	129000	138000	125000	61700	47800	62500	131000	119000	132000	134000	137000	146000	0	187000	196000	5550	284000	243000	129000	138000	125000	0.45:0.35:0.46:0.96:0.87:0.96:0.98:1.00:1.07:0:1.37:1.43:0.04:2.08:1.78:0.94:1.01:0.92	108000	163000	108000	163000	1.00:1.51
654	1924	ag|047486|140304CS1900740600001	1.01	6	1	1		61700	47800	62500	131000	119000	132000	134000	137000	146000	0	187000	196000	5550	284000	243000	129000	138000	125000	61700	47800	62500	131000	119000	132000	134000	137000	146000	0	187000	196000	5550	284000	243000	129000	138000	125000	0.45:0.35:0.46:0.96:0.87:0.96:0.98:1.00:1.07:0:1.37:1.43:0.04:2.08:1.78:0.94:1.01:0.92	108000	163000	108000	163000	1.00:1.51
654	1925	ag|188159|Deer_XM_019984650.1	1.01	5	1	1		61700	47800	62500	131000	119000	132000	134000	137000	146000	0	187000	196000	5550	284000	243000	129000	138000	125000	61700	47800	62500	131000	119000	132000	134000	137000	146000	0	187000	196000	5550	284000	243000	129000	138000	125000	0.45:0.35:0.46:0.96:0.87:0.96:0.98:1.00:1.07:0:1.37:1.43:0.04:2.08:1.78:0.94:1.01:0.92	108000	163000	108000	163000	1.00:1.51
6	1	ag|050157|140304CS1900100400003	0.99	66	43	4	Carbamidomethylation; Deamidation (NQ); Hydroxylation; Formylation; Dehydration; 5 more	19800000	20500000	19300000	22100000	24100000	24500000	23200000	22400000	22000000	32600000	26600000	32100000	19100000	19900000	19300000	26300000	27400000	29000000	15900000	15400000	14700000	17400000	18400000	19100000	17700000	16800000	16300000	10100000	9140000	9350000	14500000	15300000	14500000	16300000	17600000	19600000	0.95:0.91:0.87:1.03:1.09:1.14:1.05:1.00:0.97:0.60:0.54:0.56:0.86:0.91:0.86:0.97:1.04:1.16	22700000	26500000	17100000	14500000	1.00:0.85
588	1490	ag|160900|Deer_XM_005226252.3	0.99	4	1	1		0	6940	12300	40000	30100	22700	25300	39200	38600	32200	0	33800	48300	42400	47000	30800	29000	25900	0	6940	12300	40000	30100	22700	25300	39200	38600	32200	0	33800	48300	42400	47000	30800	29000	25900	0:0.18:0.31:1.02:0.77:0.58:0.64:1.00:0.99:0.82:0:0.86:1.23:1.08:1.20:0.78:0.74:0.66	26900	36200	26900	36200	1.00:1.34
588	1758	ag|156051|Deer_XM_010800486.2	0.99	7	1	1		0	6940	12300	40000	30100	22700	25300	39200	38600	32200	0	33800	48300	42400	47000	30800	29000	25900	0	6940	12300	40000	30100	22700	25300	39200	38600	32200	0	33800	48300	42400	47000	30800	29000	25900	0:0.18:0.31:1.02:0.77:0.58:0.64:1.00:0.99:0.82:0:0.86:1.23:1.08:1.20:0.78:0.74:0.66	26900	36200	26900	36200	1.00:1.34
588	1759	ag|100287|CS60.230410CS6000025000004	0.99	6	1	1		0	6940	12300	40000	30100	22700	25300	39200	38600	32200	0	33800	48300	42400	47000	30800	29000	25900	0	6940	12300	40000	30100	22700	25300	39200	38600	32200	0	33800	48300	42400	47000	30800	29000	25900	0:0.18:0.31:1.02:0.77:0.58:0.64:1.00:0.99:0.82:0:0.86:1.23:1.08:1.20:0.78:0.74:0.66	26900	36200	26900	36200	1.00:1.34
538	1179	ag|105625|CS60.230410CS6000055400001	0.99	2	1	1	Carbamidomethylation	112000	117000	107000	97800	111000	117000	121000	126000	112000	126000	127000	124000	210000	221000	198000	122000	149000	88400	112000	117000	107000	97800	111000	117000	121000	126000	112000	126000	127000	124000	210000	221000	198000	122000	149000	88400	0.89:0.93:0.85:0.78:0.88:0.93:0.96:1.00:0.89:1.00:1.01:0.98:1.67:1.75:1.57:0.97:1.18:0.70	113000	152000	113000	152000	1.00:1.34
95	16994	tr|A0A212DIY7|A0A212DIY7_CEREH	0.98	77	9	2	Carbamidomethylation; Hydroxylation; Amidination of lysines or N-terminal amines with methyl acetimidate	8340000	8450000	7820000	4080000	4300000	4410000	3580000	3760000	3900000	305000	309000	298000	3420000	3400000	3380000	14400000	14200000	14000000	8340000	8450000	7820000	4080000	4300000	4410000	3580000	3760000	3900000	305000	309000	298000	3420000	3400000	3380000	14400000	14200000	14000000	2.22:2.25:2.08:1.09:1.14:1.17:0.95:1.00:1.04:0.08:0.08:0.08:0.91:0.91:0.90:3.84:3.77:3.73	5400000	5970000	5400000	5970000	1.00:1.10
95	16995	tr|A0A220IGA1|A0A220IGA1_RUCDU	0.98	66	10	2	Carbamidomethylation; Hydroxylation; Amidination of lysines or N-terminal amines with methyl acetimidate	8340000	8450000	7820000	4080000	4300000	4410000	3580000	3760000	3900000	305000	309000	298000	3420000	3400000	3380000	14400000	14200000	14000000	8340000	8450000	7820000	4080000	4300000	4410000	3580000	3760000	3900000	305000	309000	298000	3420000	3400000	3380000	14400000	14200000	14000000	2.22:2.25:2.08:1.09:1.14:1.17:0.95:1.00:1.04:0.08:0.08:0.08:0.91:0.91:0.90:3.84:3.77:3.73	5400000	5970000	5400000	5970000	1.00:1.10
95	16996	tr|A0A220IG98|A0A220IG98_9CETA	0.98	77	11	2	Carbamidomethylation; Hydroxylation; Amidination of lysines or N-terminal amines with methyl acetimidate	8340000	8450000	7820000	4080000	4300000	4410000	3580000	3760000	3900000	305000	309000	298000	3420000	3400000	3380000	14400000	14200000	14000000	8340000	8450000	7820000	4080000	4300000	4410000	3580000	3760000	3900000	305000	309000	298000	3420000	3400000	3380000	14400000	14200000	14000000	2.22:2.25:2.08:1.09:1.14:1.17:0.95:1.00:1.04:0.08:0.08:0.08:0.91:0.91:0.90:3.84:3.77:3.73	5400000	5970000	5400000	5970000	1.00:1.10
95	16997	tr|A0A220IG96|A0A220IG96_ELADA	0.98	77	11	2	Carbamidomethylation; Hydroxylation; Amidination of lysines or N-terminal amines with methyl acetimidate	8340000	8450000	7820000	4080000	4300000	4410000	3580000	3760000	3900000	305000	309000	298000	3420000	3400000	3380000	14400000	14200000	14000000	8340000	8450000	7820000	4080000	4300000	4410000	3580000	3760000	3900000	305000	309000	298000	3420000	3400000	3380000	14400000	14200000	14000000	2.22:2.25:2.08:1.09:1.14:1.17:0.95:1.00:1.04:0.08:0.08:0.08:0.91:0.91:0.90:3.84:3.77:3.73	5400000	5970000	5400000	5970000	1.00:1.10
95	16998	tr|A0A220IGB1|A0A220IGB1_CEREL	0.98	77	11	2	Carbamidomethylation; Hydroxylation; Amidination of lysines or N-terminal amines with methyl acetimidate	8340000	8450000	7820000	4080000	4300000	4410000	3580000	3760000	3900000	305000	309000	298000	3420000	3400000	3380000	14400000	14200000	14000000	8340000	8450000	7820000	4080000	4300000	4410000	3580000	3760000	3900000	305000	309000	298000	3420000	3400000	3380000	14400000	14200000	14000000	2.22:2.25:2.08:1.09:1.14:1.17:0.95:1.00:1.04:0.08:0.08:0.08:0.91:0.91:0.90:3.84:3.77:3.73	5400000	5970000	5400000	5970000	1.00:1.10
463	1725	ag|092607|CS60.230410CS6000143700011	0.98	9	1	1		200000	262000	251000	409000	461000	420000	506000	507000	532000	151000	135000	129000	229000	217000	221000	559000	520000	504000	200000	262000	251000	409000	461000	420000	506000	507000	532000	151000	135000	129000	229000	217000	221000	559000	520000	504000	0.39:0.52:0.49:0.81:0.91:0.83:1.00:1.00:1.05:0.30:0.27:0.26:0.45:0.43:0.44:1.10:1.02:0.99	394000	296000	394000	296000	1.00:0.75
463	1726	ag|166375|Deer_NM_001045916.2	0.98	9	1	1		200000	262000	251000	409000	461000	420000	506000	507000	532000	151000	135000	129000	229000	217000	221000	559000	520000	504000	200000	262000	251000	409000	461000	420000	506000	507000	532000	151000	135000	129000	229000	217000	221000	559000	520000	504000	0.39:0.52:0.49:0.81:0.91:0.83:1.00:1.00:1.05:0.30:0.27:0.26:0.45:0.43:0.44:1.10:1.02:0.99	394000	296000	394000	296000	1.00:0.75
159	204	ag|027193|NODE_2555259	0.96	29	5	2		149000	180000	284000	216000	277000	190000	367000	370000	411000	134000	186000	228000	251000	349000	380000	201000	217000	242000	149000	180000	284000	216000	277000	190000	367000	370000	411000	134000	186000	228000	251000	349000	380000	201000	217000	242000	0.40:0.49:0.77:0.58:0.75:0.51:0.99:1.00:1.11:0.36:0.50:0.61:0.68:0.94:1.03:0.54:0.59:0.65	304000	269000	304000	269000	1.00:0.88
629	1109	ag|104067|CS60.230410CS6000047700001	0.95	4	1	1		245000	0	0	0	0	0	0	322000	338000	0	0	0	343000	325000	0	0	0	0	245000	0	0	0	0	0	0	322000	338000	0	0	0	343000	325000	0	0	0	0	0.76:0:0:0:0:0:0:1.00:1.05:0:0:0:1.07:1.01:0:0:0:0	302000	334000	302000	334000	1.00:1.11
629	1110	ag|155845|Deer_NM_174486.3	0.95	4	1	1		245000	0	0	0	0	0	0	322000	338000	0	0	0	343000	325000	0	0	0	0	245000	0	0	0	0	0	0	322000	338000	0	0	0	343000	325000	0	0	0	0	0.76:0:0:0:0:0:0:1.00:1.05:0:0:0:1.07:1.01:0:0:0:0	302000	334000	302000	334000	1.00:1.11
513	1649	ag|105267|CS60.230410CS6000053500008	0.95	11	1	1		30200	24100	31300	38300	38700	41700	55100	74800	59700	27700	0	33000	50100	56800	53200	39300	0	35800	30200	24100	31300	38300	38700	41700	55100	74800	59700	27700	0	33000	50100	56800	53200	39300	0	35800	0.40:0.32:0.42:0.51:0.52:0.56:0.74:1.00:0.80:0.37:0:0.44:0.67:0.76:0.71:0.53:0:0.48	43700	42300	43700	42300	1.00:0.97
513	1650	ag|050458|140304CS1901023300001	0.95	8	1	1		30200	24100	31300	38300	38700	41700	55100	74800	59700	27700	0	33000	50100	56800	53200	39300	0	35800	30200	24100	31300	38300	38700	41700	55100	74800	59700	27700	0	33000	50100	56800	53200	39300	0	35800	0.40:0.32:0.42:0.51:0.52:0.56:0.74:1.00:0.80:0.37:0:0.44:0.67:0.76:0.71:0.53:0:0.48	43700	42300	43700	42300	1.00:0.97
513	1651	ag|105266|CS60.230410CS6000053500007	0.95	7	1	1		30200	24100	31300	38300	38700	41700	55100	74800	59700	27700	0	33000	50100	56800	53200	39300	0	35800	30200	24100	31300	38300	38700	41700	55100	74800	59700	27700	0	33000	50100	56800	53200	39300	0	35800	0.40:0.32:0.42:0.51:0.52:0.56:0.74:1.00:0.80:0.37:0:0.44:0.67:0.76:0.71:0.53:0:0.48	43700	42300	43700	42300	1.00:0.97
513	1652	ag|188091|Deer_XM_019985242.1	0.95	7	1	1		30200	24100	31300	38300	38700	41700	55100	74800	59700	27700	0	33000	50100	56800	53200	39300	0	35800	30200	24100	31300	38300	38700	41700	55100	74800	59700	27700	0	33000	50100	56800	53200	39300	0	35800	0.40:0.32:0.42:0.51:0.52:0.56:0.74:1.00:0.80:0.37:0:0.44:0.67:0.76:0.71:0.53:0:0.48	43700	42300	43700	42300	1.00:0.97
513	1653	ag|142912|Deer_XM_005696228.3	0.95	7	1	1		30200	24100	31300	38300	38700	41700	55100	74800	59700	27700	0	33000	50100	56800	53200	39300	0	35800	30200	24100	31300	38300	38700	41700	55100	74800	59700	27700	0	33000	50100	56800	53200	39300	0	35800	0.40:0.32:0.42:0.51:0.52:0.56:0.74:1.00:0.80:0.37:0:0.44:0.67:0.76:0.71:0.53:0:0.48	43700	42300	43700	42300	1.00:0.97
441	948	ag|011012|NODE_1670480	0.94	2	2	2		110000	110000	112000	108000	129000	115000	207000	260000	296000	42000	41700	40100	134000	147000	173000	193000	183000	189000	110000	110000	112000	108000	129000	115000	207000	260000	296000	42000	41700	40100	134000	147000	173000	193000	183000	189000	0.42:0.42:0.43:0.42:0.50:0.44:0.80:1.00:1.14:0.16:0.16:0.15:0.52:0.57:0.66:0.74:0.70:0.73	171000	139000	171000	139000	1.00:0.81
599	1895	ag|100808|CS60.230410CS6000028800004	0.93	7	1	1		52100	54500	54000	44100	41600	51400	0	0	0	12400	20900	21100	58400	69100	43000	0	0	0	52100	54500	54000	44100	41600	51400	0	0	0	12400	20900	21100	58400	69100	43000	0	0	0	64.00:64.00:64.00:64.00:64.00:64.00:-:-:-:64.00:64.00:64.00:64.00:64.00:64.00:-:-:-	49600	37500	49600	37500	1.00:0.76
599	1896	ag|147959|Deer_XM_013974382.2	0.93	6	1	1		52100	54500	54000	44100	41600	51400	0	0	0	12400	20900	21100	58400	69100	43000	0	0	0	52100	54500	54000	44100	41600	51400	0	0	0	12400	20900	21100	58400	69100	43000	0	0	0	64.00:64.00:64.00:64.00:64.00:64.00:-:-:-:64.00:64.00:64.00:64.00:64.00:64.00:-:-:-	49600	37500	49600	37500	1.00:0.76
405	844	ag|006887|NODE_1444018	0.93	15	1	1	Carbamidomethylation	139000	139000	137000	194000	201000	208000	288000	304000	326000	339000	350000	358000	213000	204000	209000	301000	289000	281000	139000	139000	137000	194000	201000	208000	288000	304000	326000	339000	350000	358000	213000	204000	209000	301000	289000	281000	0.46:0.46:0.45:0.64:0.66:0.68:0.95:1.00:1.07:1.11:1.15:1.18:0.70:0.67:0.69:0.99:0.95:0.92	215000	282000	215000	282000	1.00:1.31
618	1376	ag|086445|CS60.230410CS600013880005F	0.93	6	1	1		984	0	1170	7550	8270	8140	5420	4270	4170	0	0	0	15000	17700	12400	2430	2070	3460	984	0	1170	7550	8270	8140	5420	4270	4170	0	0	0	15000	17700	12400	2430	2070	3460	0.23:0:0.27:1.77:1.94:1.91:1.27:1.00:0.98:0:0:0:3.51:4.15:2.91:0.57:0.49:0.81	5000	8840	5000	8840	1.00:1.77
618	1390	ag|002805|NODE_1203298	0.93	6	1	1		984	0	1170	7550	8270	8140	5420	4270	4170	0	0	0	15000	17700	12400	2430	2070	3460	984	0	1170	7550	8270	8140	5420	4270	4170	0	0	0	15000	17700	12400	2430	2070	3460	0.23:0:0.27:1.77:1.94:1.91:1.27:1.00:0.98:0:0:0:3.51:4.15:2.91:0.57:0.49:0.81	5000	8840	5000	8840	1.00:1.77
618	1667	ag|060594|CS60.230410CS6000111100026	0.93	10	1	1		984	0	1170	7550	8270	8140	5420	4270	4170	0	0	0	15000	17700	12400	2430	2070	3460	984	0	1170	7550	8270	8140	5420	4270	4170	0	0	0	15000	17700	12400	2430	2070	3460	0.23:0:0.27:1.77:1.94:1.91:1.27:1.00:0.98:0:0:0:3.51:4.15:2.91:0.57:0.49:0.81	5000	8840	5000	8840	1.00:1.77
548	1522	ag|167148|Deer_NM_001034249.2	0.92	28	1	1		45700	40700	41800	49600	48700	53900	60000	62600	66000	88900	89900	103000	73000	70300	70900	38200	39200	43700	45700	40700	41800	49600	48700	53900	60000	62600	66000	88900	89900	103000	73000	70300	70900	38200	39200	43700	0.73:0.65:0.67:0.79:0.78:0.86:0.96:1.00:1.05:1.42:1.44:1.65:1.17:1.12:1.13:0.61:0.63:0.70	52100	68600	52100	68600	1.00:1.32
548	1524	ag|103140|CS60.230410CS6000042900007	0.92	8	1	1		45700	40700	41800	49600	48700	53900	60000	62600	66000	88900	89900	103000	73000	70300	70900	38200	39200	43700	45700	40700	41800	49600	48700	53900	60000	62600	66000	88900	89900	103000	73000	70300	70900	38200	39200	43700	0.73:0.65:0.67:0.79:0.78:0.86:0.96:1.00:1.05:1.42:1.44:1.65:1.17:1.12:1.13:0.61:0.63:0.70	52100	68600	52100	68600	1.00:1.32
554	637	ag|139746|Deer_XM_005677603.3	0.92	5	1	1	Carbamidomethylation	0	0	196000	48500	31800	3790	92000	91100	102000	86500	274000	217000	0	0	0	67000	63200	8510	0	0	196000	48500	31800	3790	92000	91100	102000	86500	274000	217000	0	0	0	67000	63200	8510	0:0:2.15:0.53:0.35:0.04:1.01:1.00:1.12:0.95:3.01:2.38:0:0:0:0.74:0.69:0.09	80600	119000	80600	119000	1.00:1.48
554	638	ag|113440|CS60.230410CS600008330001D	0.92	4	1	1	Carbamidomethylation	0	0	196000	48500	31800	3790	92000	91100	102000	86500	274000	217000	0	0	0	67000	63200	8510	0	0	196000	48500	31800	3790	92000	91100	102000	86500	274000	217000	0	0	0	67000	63200	8510	0:0:2.15:0.53:0.35:0.04:1.01:1.00:1.12:0.95:3.01:2.38:0:0:0:0.74:0.69:0.09	80600	119000	80600	119000	1.00:1.48
72	51	ag|048082|140304CS1901089800001	0.91	30	11	11	Carbamidomethylation	1510000	1520000	1510000	2080000	2160000	2210000	2150000	2230000	2280000	1460000	1470000	1550000	2850000	2850000	2790000	1670000	1640000	1580000	686000	687000	680000	859000	889000	906000	954000	1000000	1020000	857000	807000	860000	1180000	1170000	1150000	766000	723000	695000	0.68:0.69:0.68:0.86:0.89:0.90:0.95:1.00:1.02:0.85:0.81:0.86:1.18:1.17:1.15:0.76:0.72:0.69	1990000	2100000	854000	912000	1.00:1.07
381	624	ag|145139|Deer_XM_018064990.1	0.87	11	2	2		74900	162000	171000	190000	200000	212000	117000	236000	242000	94200	93700	296000	335000	333000	349000	140000	79100	38800	74900	162000	171000	190000	200000	212000	117000	236000	242000	94200	93700	296000	335000	333000	349000	140000	79100	38800	0.32:0.68:0.72:0.80:0.85:0.90:0.49:1.00:1.02:0.40:0.40:1.25:1.42:1.41:1.48:0.59:0.33:0.16	191000	251000	191000	251000	1.00:1.32
21	45	ag|051507|140304CS1901128600001	0.87	53	20	20	Carbamidomethylation; Pyro-glu from Q; Acetylation (Protein N-term)	15400000	15700000	15200000	16700000	17600000	17000000	20900000	21200000	22000000	13300000	13600000	13300000	18800000	18800000	19100000	13500000	13600000	13400000	4650000	4750000	4490000	4320000	4580000	4770000	5840000	6050000	6330000	5400000	5430000	5490000	5160000	5020000	5360000	3880000	3840000	3700000	0.77:0.79:0.74:0.71:0.76:0.79:0.97:1.00:1.05:0.89:0.90:0.91:0.85:0.83:0.89:0.64:0.63:0.61	18000000	15500000	5090000	4810000	1.00:0.95
602	16993	tr|A0A212D7B8|A0A212D7B8_CEREH	0.86	4	2	1		82100	77400	75200	62600	70400	70500	142000	145000	154000	0	0	0	69700	66100	63100	163000	154000	164000	82100	77400	75200	62600	70400	70500	142000	145000	154000	0	0	0	69700	66100	63100	163000	154000	164000	0.57:0.53:0.52:0.43:0.49:0.49:0.98:1.00:1.06:0:0:0:0.48:0.46:0.43:1.12:1.06:1.13	97800	113000	97800	113000	1.00:1.16
498	2023	ag|046947|140304CS1900465500001	0.86	8	1	1	Deamidation (NQ); Hydroxylation	2810000	2970000	2650000	2830000	3090000	3250000	3280000	3380000	3530000	4550000	4560000	4630000	3240000	3190000	3280000	4070000	4010000	3970000	2810000	2970000	2650000	2830000	3090000	3250000	3280000	3380000	3530000	4550000	4560000	4630000	3240000	3190000	3280000	4070000	4010000	3970000	0.83:0.88:0.79:0.84:0.91:0.96:0.97:1.00:1.04:1.35:1.35:1.37:0.96:0.95:0.97:1.21:1.19:1.18	3090000	3950000	3090000	3950000	1.00:1.28
508	967	ag|046694|010608CEEF015209HT_CS19	0.85	8	1	1		77400	82200	75600	96000	104000	109000	161000	160000	169000	101000	110000	111000	121000	122000	124000	83100	83100	79400	77400	82200	75600	96000	104000	109000	161000	160000	169000	101000	110000	111000	121000	122000	124000	83100	83100	79400	0.48:0.51:0.47:0.60:0.65:0.68:1.00:1.00:1.06:0.63:0.69:0.69:0.76:0.76:0.78:0.52:0.52:0.50	115000	104000	115000	104000	1.00:0.90
508	968	ag|099740|CS60.230410CS6000021500012	0.85	6	1	1		77400	82200	75600	96000	104000	109000	161000	160000	169000	101000	110000	111000	121000	122000	124000	83100	83100	79400	77400	82200	75600	96000	104000	109000	161000	160000	169000	101000	110000	111000	121000	122000	124000	83100	83100	79400	0.48:0.51:0.47:0.60:0.65:0.68:1.00:1.00:1.06:0.63:0.69:0.69:0.76:0.76:0.78:0.52:0.52:0.50	115000	104000	115000	104000	1.00:0.90
511	17006	tr|A0A212D4L7|A0A212D4L7_CEREH	0.83	18	3	1		125000	125000	121000	113000	121000	128000	140000	145000	148000	19500	24900	30400	223000	232000	236000	94500	91400	90200	125000	125000	121000	113000	121000	128000	140000	145000	148000	19500	24900	30400	223000	232000	236000	94500	91400	90200	0.86:0.86:0.83:0.78:0.83:0.88:0.97:1.00:1.02:0.13:0.17:0.21:1.54:1.60:1.63:0.65:0.63:0.62	130000	116000	130000	116000	1.00:0.89
452	829	ag|045144|140304CS1900010100003	0.83	10	2	2		61400	60700	58600	82800	84800	99100	48600	53200	57300	0	0	0	155000	146000	148000	48400	7280	41400	61400	60700	58600	82800	84800	99100	48600	53200	57300	0	0	0	155000	146000	148000	48400	7280	41400	1.15:1.14:1.10:1.56:1.60:1.86:0.91:1.00:1.08:0:0:0:2.92:2.75:2.78:0.91:0.14:0.78	67400	106000	67400	106000	1.00:1.57
525	2109	ag|017932|NODE_2087338	0.82	24	1	1	Deamidation (NQ)	157000	163000	138000	174000	186000	187000	167000	170000	188000	142000	121000	131000	315000	322000	278000	232000	203000	206000	157000	163000	138000	174000	186000	187000	167000	170000	188000	142000	121000	131000	315000	322000	278000	232000	203000	206000	0.92:0.96:0.81:1.02:1.10:1.10:0.98:1.00:1.11:0.84:0.71:0.77:1.85:1.90:1.64:1.37:1.20:1.21	170000	217000	170000	217000	1.00:1.28
568	27071	sp|P02790|HEMO_HUMAN	0.82	2	1	1	Carbamidomethylation	295000	313000	290000	288000	310000	268000	0	3510	0	478000	429000	427000	0	5020	6130	12900	6600	19600	295000	313000	290000	288000	310000	268000	0	3510	0	478000	429000	427000	0	5020	6130	12900	6600	19600	64.00:64.00:64.00:64.00:64.00:64.00:0:1.00:0:64.00:64.00:64.00:0:1.43:1.75:3.69:1.88:5.59	253000	173000	253000	173000	1.00:0.69
394	863	ag|101199|CS60.230410CS6000030700006	0.79	9	2	2	Deamidation (NQ); Persulfide; Deoxy	133000	196000	27700	162000	221000	234000	237000	260000	232000	0	0	0	498000	291000	349000	138000	248000	198000	26900	196000	27700	48000	221000	234000	237000	254000	232000	0	0	0	335000	107000	349000	40900	176000	198000	0.11:0.77:0.11:0.19:0.87:0.92:0.93:1.00:0.91:0:0:0:1.32:0.42:1.38:0.16:0.69:0.78	275000	396000	199000	267000	1.00:1.34
483	1424	ag|050119|140304CS1901454600001	0.78	6	1	1		40500	40400	38700	41900	45700	47700	60300	61000	60000	43600	2350	3180	41700	43100	46300	56300	54000	53600	40500	40400	38700	41900	45700	47700	60300	61000	60000	43600	2350	3180	41700	43100	46300	56300	54000	53600	0.66:0.66:0.63:0.69:0.75:0.78:0.99:1.00:0.98:0.71:0.04:0.05:0.68:0.71:0.76:0.92:0.88:0.88	48400	38200	48400	38200	1.00:0.79
483	1425	ag|067656|CS60.230410CS600012230002B	0.78	6	1	1		40500	40400	38700	41900	45700	47700	60300	61000	60000	43600	2350	3180	41700	43100	46300	56300	54000	53600	40500	40400	38700	41900	45700	47700	60300	61000	60000	43600	2350	3180	41700	43100	46300	56300	54000	53600	0.66:0.66:0.63:0.69:0.75:0.78:0.99:1.00:0.98:0.71:0.04:0.05:0.68:0.71:0.76:0.92:0.88:0.88	48400	38200	48400	38200	1.00:0.79
75	257	ag|168985|Deer_NM_001009802.1	0.78	25	8	1	Carbamidomethylation; Deamidation (NQ); Pyro-glu from Q	474000	489000	464000	394000	420000	437000	819000	827000	857000	799000	788000	785000	353000	344000	361000	1060000	1030000	990000	474000	489000	464000	394000	420000	437000	819000	827000	857000	799000	788000	785000	353000	344000	361000	1060000	1030000	990000	0.57:0.59:0.56:0.48:0.51:0.53:0.99:1.00:1.04:0.97:0.95:0.95:0.43:0.42:0.44:1.28:1.25:1.20	576000	724000	576000	724000	1.00:1.26
329	513	ag|049975|140304CS1900066500001	0.76	26	4	1		19100	11400	19300	52000	60000	58400	104000	112000	111000	64600	66600	64100	96100	96900	96400	69500	67500	65300	19100	11400	19300	52000	60000	58400	104000	112000	111000	64600	66600	64100	96100	96900	96400	69500	67500	65300	0.17:0.10:0.17:0.47:0.54:0.52:0.93:1.00:0.99:0.58:0.60:0.57:0.86:0.87:0.86:0.62:0.60:0.58	60700	76300	60700	76300	1.00:1.26
621	1452	ag|010407|NODE_1655939	0.75	9	1	1		25100	31000	53000	96000	53700	74600	0	70400	83000	41700	70300	0	139000	124000	125000	0	40300	72000	25100	31000	53000	96000	53700	74600	0	70400	83000	41700	70300	0	139000	124000	125000	0	40300	72000	0.36:0.44:0.75:1.36:0.76:1.06:0:1.00:1.18:0.59:1.00:0:1.97:1.76:1.77:0:0.57:1.02	60900	87300	60900	87300	1.00:1.44
520	1603	ag|167784|Deer_NM_001046079.1	0.75	7	1	1		63900	66500	59900	34600	38000	41600	75300	79900	84700	114000	116000	117000	29700	27500	29700	81700	84300	81400	63900	66500	59900	34600	38000	41600	75300	79900	84700	114000	116000	117000	29700	27500	29700	81700	84300	81400	0.80:0.83:0.75:0.43:0.48:0.52:0.94:1.00:1.06:1.43:1.45:1.46:0.37:0.34:0.37:1.02:1.05:1.02	60500	75700	60500	75700	1.00:1.25
520	1605	ag|138817|Deer_XM_005680592.3	0.75	7	1	1		63900	66500	59900	34600	38000	41600	75300	79900	84700	114000	116000	117000	29700	27500	29700	81700	84300	81400	63900	66500	59900	34600	38000	41600	75300	79900	84700	114000	116000	117000	29700	27500	29700	81700	84300	81400	0.80:0.83:0.75:0.43:0.48:0.52:0.94:1.00:1.06:1.43:1.45:1.46:0.37:0.34:0.37:1.02:1.05:1.02	60500	75700	60500	75700	1.00:1.25
265	358	ag|173217|Deer_XM_015099326.1	0.74	11	3	1		171000	0	80300	82200	47700	87800	98300	102000	0	64900	0	0	0	257000	301000	0	0	94300	171000	0	80300	82200	47700	87800	98300	102000	0	64900	0	0	0	257000	301000	0	0	94300	1.67:0:0.79:0.80:0.47:0.86:0.96:1.00:0:0.64:0:0:0:2.52:2.95:0:0:0.92	95600	179000	95600	179000	1.00:1.88
242	405	ag|155910|Deer_NM_174058.2	0.74	14	4	4	Carbamidomethylation	415000	423000	399000	778000	823000	846000	918000	941000	999000	633000	667000	659000	1160000	1150000	1140000	449000	434000	428000	366000	372000	356000	690000	732000	752000	798000	818000	875000	584000	612000	607000	1030000	1010000	1010000	412000	397000	393000	0.45:0.45:0.43:0.84:0.89:0.92:0.97:1.00:1.07:0.71:0.75:0.74:1.26:1.24:1.24:0.50:0.48:0.48	727000	746000	640000	673000	1.00:1.05
501	27140	tr|B4DE78|B4DE78_HUMAN	0.74	25	4	1	Deamidation (NQ)	204000	221000	178000	206000	148000	232000	237000	222000	260000	0	0	0	350000	365000	370000	134000	0	308000	204000	221000	178000	206000	148000	232000	237000	222000	260000	0	0	0	350000	365000	370000	134000	0	308000	0.92:0.99:0.80:0.93:0.67:1.04:1.07:1.00:1.17:0:0:0:1.58:1.64:1.67:0.60:0:1.39	212000	305000	212000	305000	1.00:1.44
501	17137	tr|L8ITE2|L8ITE2_9CETA	0.74	21	4	1	Deamidation (NQ)	204000	221000	178000	206000	148000	232000	237000	222000	260000	0	0	0	350000	365000	370000	134000	0	308000	204000	221000	178000	206000	148000	232000	237000	222000	260000	0	0	0	350000	365000	370000	134000	0	308000	0.92:0.99:0.80:0.93:0.67:1.04:1.07:1.00:1.17:0:0:0:1.58:1.64:1.67:0.60:0:1.39	212000	305000	212000	305000	1.00:1.44
501	17138	sp|P68252|1433G_BOVIN	0.74	21	4	1	Deamidation (NQ)	204000	221000	178000	206000	148000	232000	237000	222000	260000	0	0	0	350000	365000	370000	134000	0	308000	204000	221000	178000	206000	148000	232000	237000	222000	260000	0	0	0	350000	365000	370000	134000	0	308000	0.92:0.99:0.80:0.93:0.67:1.04:1.07:1.00:1.17:0:0:0:1.58:1.64:1.67:0.60:0:1.39	212000	305000	212000	305000	1.00:1.44
501	17139	tr|A7Z057|A7Z057_BOVIN	0.74	21	4	1	Deamidation (NQ)	204000	221000	178000	206000	148000	232000	237000	222000	260000	0	0	0	350000	365000	370000	134000	0	308000	204000	221000	178000	206000	148000	232000	237000	222000	260000	0	0	0	350000	365000	370000	134000	0	308000	0.92:0.99:0.80:0.93:0.67:1.04:1.07:1.00:1.17:0:0:0:1.58:1.64:1.67:0.60:0:1.39	212000	305000	212000	305000	1.00:1.44
501	27141	tr|B3KNB4|B3KNB4_HUMAN	0.74	21	4	1	Deamidation (NQ)	204000	221000	178000	206000	148000	232000	237000	222000	260000	0	0	0	350000	365000	370000	134000	0	308000	204000	221000	178000	206000	148000	232000	237000	222000	260000	0	0	0	350000	365000	370000	134000	0	308000	0.92:0.99:0.80:0.93:0.67:1.04:1.07:1.00:1.17:0:0:0:1.58:1.64:1.67:0.60:0:1.39	212000	305000	212000	305000	1.00:1.44
501	27142	sp|P61981|1433G_HUMAN	0.74	21	4	1	Deamidation (NQ)	204000	221000	178000	206000	148000	232000	237000	222000	260000	0	0	0	350000	365000	370000	134000	0	308000	204000	221000	178000	206000	148000	232000	237000	222000	260000	0	0	0	350000	365000	370000	134000	0	308000	0.92:0.99:0.80:0.93:0.67:1.04:1.07:1.00:1.17:0:0:0:1.58:1.64:1.67:0.60:0:1.39	212000	305000	212000	305000	1.00:1.44
601	17042	sp|A2I7N2|SPA36_BOVIN	0.73	3	1	1	Hydroxylation	16600	0	17000	46500	50700	32800	26200	71100	0	0	0	1000	44500	44400	40000	0	78800	0	16600	0	17000	46500	50700	32800	26200	71100	0	0	0	1000	44500	44400	40000	0	78800	0	0.23:0:0.24:0.65:0.71:0.46:0.37:1.00:0:0:0:0.02:0.63:0.62:0.56:0:1.11:0	37300	41700	37300	41700	1.00:1.12
601	17043	tr|A0A0A0MP89|A0A0A0MP89_BOVIN	0.73	3	1	1	Hydroxylation	16600	0	17000	46500	50700	32800	26200	71100	0	0	0	1000	44500	44400	40000	0	78800	0	16600	0	17000	46500	50700	32800	26200	71100	0	0	0	1000	44500	44400	40000	0	78800	0	0.23:0:0.24:0.65:0.71:0.46:0.37:1.00:0:0:0:0.02:0.63:0.62:0.56:0:1.11:0	37300	41700	37300	41700	1.00:1.12
601	17044	sp|A6QPQ2|SPA38_BOVIN	0.73	3	1	1	Hydroxylation	16600	0	17000	46500	50700	32800	26200	71100	0	0	0	1000	44500	44400	40000	0	78800	0	16600	0	17000	46500	50700	32800	26200	71100	0	0	0	1000	44500	44400	40000	0	78800	0	0.23:0:0.24:0.65:0.71:0.46:0.37:1.00:0:0:0:0.02:0.63:0.62:0.56:0:1.11:0	37300	41700	37300	41700	1.00:1.12
577	897	ag|026129|NODE_2528725	0.72	9	1	1		16100	42800	66300	112000	112000	119000	84000	94100	74200	20400	0	14000	94300	83100	85500	110000	104000	108000	16100	42800	66300	112000	112000	119000	84000	94100	74200	20400	0	14000	94300	83100	85500	110000	104000	108000	0.17:0.45:0.70:1.19:1.19:1.26:0.89:1.00:0.79:0.22:0:0.15:1.00:0.88:0.91:1.17:1.10:1.14	80000	77300	80000	77300	1.00:0.97
577	898	ag|178259|Deer_XM_012097442.2	0.72	6	1	1		16100	42800	66300	112000	112000	119000	84000	94100	74200	20400	0	14000	94300	83100	85500	110000	104000	108000	16100	42800	66300	112000	112000	119000	84000	94100	74200	20400	0	14000	94300	83100	85500	110000	104000	108000	0.17:0.45:0.70:1.19:1.19:1.26:0.89:1.00:0.79:0.22:0:0.15:1.00:0.88:0.91:1.17:1.10:1.14	80000	77300	80000	77300	1.00:0.97
119	1038	ag|120167|CS60.230410CS60000107FFFFD	0.72	48	2	1	Deamidation (NQ)	0	0	23200	633000	30900	492000	98200	54100	60700	49000	0	0	360000	345000	253000	76800	79600	73300	0	0	23200	633000	30900	492000	98200	54100	60700	49000	0	0	360000	345000	253000	76800	79600	73300	0:0:0.43:11.70:0.57:9.09:1.81:1.00:1.12:0.91:0:0:6.65:6.38:4.67:1.42:1.47:1.35	199000	177000	199000	177000	1.00:0.89
455	286	ag|119210|CS60.230410CS600009910000E	0.72	5	2	2	Carbamidomethylation	112000	28200	127000	81900	76900	123000	119000	188000	146000	26900	24900	26900	245000	65100	186000	102000	146000	104000	112000	28200	127000	81900	76900	123000	119000	188000	146000	26900	24900	26900	245000	65100	186000	102000	146000	104000	0.60:0.15:0.68:0.44:0.41:0.65:0.63:1.00:0.78:0.14:0.13:0.14:1.30:0.35:0.99:0.54:0.78:0.55	120000	144000	120000	144000	1.00:1.20
620	1396	ag|171098|Deer_XM_015102450.1	0.72	3	1	1		42200	45800	44700	32200	38800	33500	44000	46600	51200	47200	50900	51100	82300	81400	77600	43000	0	37700	42200	45800	44700	32200	38800	33500	44000	46600	51200	47200	50900	51100	82300	81400	77600	43000	0	37700	0.90:0.98:0.96:0.69:0.83:0.72:0.94:1.00:1.10:1.01:1.09:1.10:1.77:1.75:1.66:0.92:0:0.81	42100	58900	42100	58900	1.00:1.40
620	1501	ag|035066|NODE_624464	0.72	5	1	1		42200	45800	44700	32200	38800	33500	44000	46600	51200	47200	50900	51100	82300	81400	77600	43000	0	37700	42200	45800	44700	32200	38800	33500	44000	46600	51200	47200	50900	51100	82300	81400	77600	43000	0	37700	0.90:0.98:0.96:0.69:0.83:0.72:0.94:1.00:1.10:1.01:1.09:1.10:1.77:1.75:1.66:0.92:0:0.81	42100	58900	42100	58900	1.00:1.40
587	1309	ag|099653|CS60.230410CS6000002100007	0.71	11	1	1		45300	44400	41900	30100	31600	32800	19200	19800	23600	37500	37500	36900	52100	50400	47400	19600	17300	19800	45300	44400	41900	30100	31600	32800	19200	19800	23600	37500	37500	36900	52100	50400	47400	19600	17300	19800	2.29:2.24:2.11:1.52:1.59:1.66:0.97:1.00:1.19:1.89:1.89:1.86:2.63:2.54:2.39:0.99:0.87:1.00	32100	35400	32100	35400	1.00:1.10
587	1310	ag|099652|CS60.230410CS6000002100006	0.71	7	1	1		45300	44400	41900	30100	31600	32800	19200	19800	23600	37500	37500	36900	52100	50400	47400	19600	17300	19800	45300	44400	41900	30100	31600	32800	19200	19800	23600	37500	37500	36900	52100	50400	47400	19600	17300	19800	2.29:2.24:2.11:1.52:1.59:1.66:0.97:1.00:1.19:1.89:1.89:1.86:2.63:2.54:2.39:0.99:0.87:1.00	32100	35400	32100	35400	1.00:1.10
198	577	ag|100993|CS60.230410CS6000000300028	0.7	38	5	1	Carbamidomethylation	129000	103000	85700	138000	136000	160000	298000	325000	322000	243000	252000	244000	98600	126000	124000	387000	315000	302000	129000	103000	85700	138000	136000	160000	298000	325000	322000	243000	252000	244000	98600	126000	124000	387000	315000	302000	0.40:0.32:0.26:0.43:0.42:0.49:0.92:1.00:0.99:0.75:0.78:0.75:0.30:0.39:0.38:1.19:0.97:0.93	188000	232000	188000	232000	1.00:1.23
198	579	ag|101021|CS60.230410CS6000000300044	0.7	23	5	1	Carbamidomethylation	129000	103000	85700	138000	136000	160000	298000	325000	322000	243000	252000	244000	98600	126000	124000	387000	315000	302000	129000	103000	85700	138000	136000	160000	298000	325000	322000	243000	252000	244000	98600	126000	124000	387000	315000	302000	0.40:0.32:0.26:0.43:0.42:0.49:0.92:1.00:0.99:0.75:0.78:0.75:0.30:0.39:0.38:1.19:0.97:0.93	188000	232000	188000	232000	1.00:1.23
693	1822	ag|018832|NODE_2157902	0.69	6	1	1		105000	98100	95400	66200	77800	69800	119000	131000	127000	146000	145000	151000	111000	111000	115000	100000	104000	114000	105000	98100	95400	66200	77800	69800	119000	131000	127000	146000	145000	151000	111000	111000	115000	100000	104000	114000	0.80:0.75:0.73:0.51:0.59:0.53:0.91:1.00:0.97:1.12:1.11:1.16:0.85:0.85:0.88:0.77:0.79:0.87	98800	122000	98800	122000	1.00:1.23
693	1823	ag|166834|Deer_NM_182652.2	0.69	6	1	1		105000	98100	95400	66200	77800	69800	119000	131000	127000	146000	145000	151000	111000	111000	115000	100000	104000	114000	105000	98100	95400	66200	77800	69800	119000	131000	127000	146000	145000	151000	111000	111000	115000	100000	104000	114000	0.80:0.75:0.73:0.51:0.59:0.53:0.91:1.00:0.97:1.12:1.11:1.16:0.85:0.85:0.88:0.77:0.79:0.87	98800	122000	98800	122000	1.00:1.23
693	1824	ag|112634|CS60.230410CS600008100001C	0.69	5	1	1		105000	98100	95400	66200	77800	69800	119000	131000	127000	146000	145000	151000	111000	111000	115000	100000	104000	114000	105000	98100	95400	66200	77800	69800	119000	131000	127000	146000	145000	151000	111000	111000	115000	100000	104000	114000	0.80:0.75:0.73:0.51:0.59:0.53:0.91:1.00:0.97:1.12:1.11:1.16:0.85:0.85:0.88:0.77:0.79:0.87	98800	122000	98800	122000	1.00:1.23
419	1517	ag|170528|Deer_XM_012102148.2	0.67	19	1	1		118000	78900	132000	180000	191000	197000	279000	338000	301000	19800	14300	41500	435000	432000	388000	290000	307000	295000	118000	78900	132000	180000	191000	197000	279000	338000	301000	19800	14300	41500	435000	432000	388000	290000	307000	295000	0.35:0.23:0.39:0.53:0.57:0.58:0.82:1.00:0.89:0.06:0.04:0.12:1.28:1.28:1.15:0.86:0.91:0.87	202000	247000	202000	247000	1.00:1.22
419	1518	ag|182979|Deer_XM_012117290.2	0.67	18	1	1		118000	78900	132000	180000	191000	197000	279000	338000	301000	19800	14300	41500	435000	432000	388000	290000	307000	295000	118000	78900	132000	180000	191000	197000	279000	338000	301000	19800	14300	41500	435000	432000	388000	290000	307000	295000	0.35:0.23:0.39:0.53:0.57:0.58:0.82:1.00:0.89:0.06:0.04:0.12:1.28:1.28:1.15:0.86:0.91:0.87	202000	247000	202000	247000	1.00:1.22
419	1519	ag|143212|Deer_XM_005699911.3	0.67	18	1	1		118000	78900	132000	180000	191000	197000	279000	338000	301000	19800	14300	41500	435000	432000	388000	290000	307000	295000	118000	78900	132000	180000	191000	197000	279000	338000	301000	19800	14300	41500	435000	432000	388000	290000	307000	295000	0.35:0.23:0.39:0.53:0.57:0.58:0.82:1.00:0.89:0.06:0.04:0.12:1.28:1.28:1.15:0.86:0.91:0.87	202000	247000	202000	247000	1.00:1.22
293	489	ag|171412|Deer_XM_015101963.1	0.65	34	5	5		21100	53700	23600	1150000	3890000	3970000	231000	348000	55200	2380000	2210000	2340000	1770000	1210000	1200000	440000	269000	676000	21100	53700	23600	839000	3550000	3860000	231000	294000	55200	1610000	1510000	1620000	1570000	1010000	999000	440000	269000	676000	0.07:0.18:0.08:2.85:12.07:13.15:0.79:1.00:0.19:5.47:5.15:5.50:5.35:3.45:3.40:1.50:0.91:2.30	1650000	1840000	1330000	1170000	1.00:0.88
293	490	ag|057956|CS60.230410CS6000106100025	0.65	26	5	5		21100	53700	23600	1150000	3890000	3970000	231000	348000	55200	2380000	2210000	2340000	1770000	1210000	1200000	440000	269000	676000	21100	53700	23600	839000	3550000	3860000	231000	294000	55200	1610000	1510000	1620000	1570000	1010000	999000	440000	269000	676000	0.07:0.18:0.08:2.85:12.07:13.15:0.79:1.00:0.19:5.47:5.15:5.50:5.35:3.45:3.40:1.50:0.91:2.30	1650000	1840000	1330000	1170000	1.00:0.88
371	590	ag|112684|CS60.230410CS600008120000B	0.64	6	1	1	Carbamidomethylation	88800	88900	82400	137000	174000	172000	260000	307000	320000	203000	262000	250000	153000	157000	136000	127000	124000	125000	88800	88900	82400	137000	174000	172000	260000	307000	320000	203000	262000	250000	153000	157000	136000	127000	124000	125000	0.29:0.29:0.27:0.45:0.57:0.56:0.85:1.00:1.04:0.66:0.85:0.81:0.50:0.51:0.44:0.41:0.40:0.41	181000	171000	181000	171000	1.00:0.94
391	16984	tr|A0A212CSV5|A0A212CSV5_CEREH	0.64	29	8	1		205000	207000	203000	156000	173000	180000	152000	141000	123000	193000	167000	175000	91400	101000	93300	124000	154000	173000	205000	207000	203000	156000	173000	180000	152000	141000	123000	193000	167000	175000	91400	101000	93300	124000	154000	173000	1.46:1.47:1.44:1.10:1.23:1.28:1.08:1.00:0.87:1.37:1.18:1.24:0.65:0.72:0.66:0.88:1.09:1.22	171000	141000	171000	141000	1.00:0.83
153	275	ag|179760|Deer_XM_012158519.2	0.62	35	7	7	Carbamidomethylation; Deamidation (NQ); Pyro-glu from Q	679000	630000	654000	1190000	1230000	1200000	1390000	1420000	1330000	621000	658000	568000	1410000	1440000	1570000	1040000	1020000	945000	445000	439000	436000	688000	754000	736000	942000	1000000	887000	410000	438000	402000	861000	925000	975000	700000	655000	648000	0.44:0.44:0.43:0.69:0.75:0.73:0.94:1.00:0.88:0.41:0.44:0.40:0.86:0.92:0.97:0.70:0.65:0.65	1130000	1080000	703000	668000	1.00:0.95
153	276	ag|050140|010607CEIE020150HT_CS19	0.62	39	7	7	Carbamidomethylation; Deamidation (NQ); Pyro-glu from Q	679000	630000	654000	1190000	1230000	1200000	1390000	1420000	1330000	621000	658000	568000	1410000	1440000	1570000	1040000	1020000	945000	445000	439000	436000	688000	754000	736000	942000	1000000	887000	410000	438000	402000	861000	925000	975000	700000	655000	648000	0.44:0.44:0.43:0.69:0.75:0.73:0.94:1.00:0.88:0.41:0.44:0.40:0.86:0.92:0.97:0.70:0.65:0.65	1130000	1080000	703000	668000	1.00:0.95
153	277	ag|185474|Deer_XM_004002658.2	0.62	38	7	7	Carbamidomethylation; Deamidation (NQ); Pyro-glu from Q	679000	630000	654000	1190000	1230000	1200000	1390000	1420000	1330000	621000	658000	568000	1410000	1440000	1570000	1040000	1020000	945000	445000	439000	436000	688000	754000	736000	942000	1000000	887000	410000	438000	402000	861000	925000	975000	700000	655000	648000	0.44:0.44:0.43:0.69:0.75:0.73:0.94:1.00:0.88:0.41:0.44:0.40:0.86:0.92:0.97:0.70:0.65:0.65	1130000	1080000	703000	668000	1.00:0.95
153	278	ag|184095|Deer_XM_012158518.1	0.62	34	7	7	Carbamidomethylation; Deamidation (NQ); Pyro-glu from Q	679000	630000	654000	1190000	1230000	1200000	1390000	1420000	1330000	621000	658000	568000	1410000	1440000	1570000	1040000	1020000	945000	445000	439000	436000	688000	754000	736000	942000	1000000	887000	410000	438000	402000	861000	925000	975000	700000	655000	648000	0.44:0.44:0.43:0.69:0.75:0.73:0.94:1.00:0.88:0.41:0.44:0.40:0.86:0.92:0.97:0.70:0.65:0.65	1130000	1080000	703000	668000	1.00:0.95
637	1965	ag|122359|CS60.230410CS60000148FFFFE	0.61	15	1	1	Deamidation (NQ)	57200	56300	55500	31400	39300	31100	62000	48100	60900	0	0	3480	93300	100000	100000	25600	24700	18900	57200	56300	55500	31400	39300	31100	62000	48100	60900	0	0	3480	93300	100000	100000	25600	24700	18900	1.19:1.17:1.16:0.65:0.82:0.65:1.29:1.00:1.27:0:0:0.07:1.94:2.09:2.08:0.53:0.51:0.39	49100	52300	49100	52300	1.00:1.07
376	861	ag|100449|CS60.230410CS6000026200001	0.6	15	2	2	Carbamidomethylation	214000	232000	211000	262000	276000	278000	358000	371000	379000	182000	196000	192000	453000	394000	433000	300000	283000	280000	214000	232000	211000	262000	276000	278000	358000	371000	379000	182000	196000	192000	453000	394000	433000	300000	283000	280000	0.58:0.62:0.57:0.71:0.74:0.75:0.96:1.00:1.02:0.49:0.53:0.52:1.22:1.06:1.17:0.81:0.76:0.75	287000	301000	287000	301000	1.00:1.05
107	68	ag|063559|CS60.230410CS6000011700001	0.6	20	10	8		857000	734000	852000	777000	738000	739000	841000	974000	922000	597000	655000	628000	1390000	1200000	1210000	664000	582000	499000	470000	426000	447000	405000	335000	324000	411000	528000	438000	315000	341000	337000	699000	530000	704000	423000	362000	265000	0.89:0.81:0.85:0.77:0.63:0.61:0.78:1.00:0.83:0.60:0.65:0.64:1.32:1.00:1.33:0.80:0.69:0.50	841000	898000	436000	460000	1.00:1.06
107	69	ag|155834|Deer_NM_001075148.1	0.6	19	10	8		857000	734000	852000	777000	738000	739000	841000	974000	922000	597000	655000	628000	1390000	1200000	1210000	664000	582000	499000	470000	426000	447000	405000	335000	324000	411000	528000	438000	315000	341000	337000	699000	530000	704000	423000	362000	265000	0.89:0.81:0.85:0.77:0.63:0.61:0.78:1.00:0.83:0.60:0.65:0.64:1.32:1.00:1.33:0.80:0.69:0.50	841000	898000	436000	460000	1.00:1.06
518	954	ag|102127|CS60.230410CS6000003700008	0.59	14	2	2	Carbamidomethylation	73800	56400	75900	93300	72900	99400	79100	66300	102000	9440	20700	0	166000	208000	175000	50200	43800	109000	73800	56400	75900	93300	72900	99400	79100	66300	102000	9440	20700	0	166000	208000	175000	50200	43800	109000	1.11:0.85:1.14:1.41:1.10:1.50:1.19:1.00:1.54:0.14:0.31:0:2.51:3.13:2.64:0.76:0.66:1.65	80000	133000	80000	133000	1.00:1.67
335	690	ag|101434|CS60.230410CS6000032200009	0.56	9	3	1	Carbamidomethylation	40600	0	65600	91200	82000	98500	84000	104000	88000	45900	45100	46800	123000	123000	116000	76900	76900	67800	40600	0	65600	91200	82000	98500	84000	104000	88000	45900	45100	46800	123000	123000	116000	76900	76900	67800	0.39:0:0.63:0.88:0.79:0.95:0.81:1.00:0.84:0.44:0.43:0.45:1.19:1.18:1.11:0.74:0.74:0.65	81800	80200	81800	80200	1.00:0.98
335	691	ag|051964|140304CS1900710600001	0.56	8	3	1	Carbamidomethylation	40600	0	65600	91200	82000	98500	84000	104000	88000	45900	45100	46800	123000	123000	116000	76900	76900	67800	40600	0	65600	91200	82000	98500	84000	104000	88000	45900	45100	46800	123000	123000	116000	76900	76900	67800	0.39:0:0.63:0.88:0.79:0.95:0.81:1.00:0.84:0.44:0.43:0.45:1.19:1.18:1.11:0.74:0.74:0.65	81800	80200	81800	80200	1.00:0.98
514	1906	ag|053416|140304CS1900144700001	0.56	7	1	1	Carbamidomethylation	15500	6260	16500	31000	36800	30800	35400	32900	38800	39800	37000	40800	0	0	41600	24700	21200	0	15500	6260	16500	31000	36800	30800	35400	32900	38800	39800	37000	40800	0	0	41600	24700	21200	0	0.47:0.19:0.50:0.94:1.12:0.94:1.07:1.00:1.18:1.21:1.12:1.24:0:0:1.26:0.75:0.64:0	27100	34200	27100	34200	1.00:1.26
451	746	ag|109378|CS60.230410CS6000069900012	0.55	10	2	1	Carbamidomethylation	46300	45300	44300	79600	77000	76000	76800	71300	77400	124000	123000	130000	57900	53100	52900	73200	13700	76400	46300	45300	44300	79600	77000	76000	76800	71300	77400	124000	123000	130000	57900	53100	52900	73200	13700	76400	0.65:0.63:0.62:1.12:1.08:1.06:1.08:1.00:1.08:1.74:1.73:1.82:0.81:0.74:0.74:1.03:0.19:1.07	66000	78200	66000	78200	1.00:1.19
81	57	ag|047674|140304CS1901079300002	0.55	29	15	9	Carbamidomethylation; Deamidation (NQ)	1000000	960000	961000	877000	945000	1000000	1120000	1210000	1110000	465000	471000	462000	1990000	1950000	1880000	859000	913000	904000	534000	521000	538000	465000	444000	485000	561000	632000	564000	265000	256000	249000	967000	1010000	864000	465000	451000	463000	0.85:0.82:0.85:0.74:0.70:0.77:0.89:1.00:0.89:0.42:0.41:0.39:1.53:1.60:1.37:0.74:0.71:0.73	1070000	1310000	527000	652000	1.00:1.24
661	1586	ag|100933|CS60.230410CS6000029800004	0.55	8	1	1	Carbamidomethylation	8230	0	0	39300	35700	0	0	37900	38700	14500	12300	0	0	0	0	35900	37000	35000	8230	0	0	39300	35700	0	0	37900	38700	14500	12300	0	0	0	0	35900	37000	35000	0.22:0:0:1.04:0.94:0:0:1.00:1.02:0.38:0.32:0:0:0:0:0.95:0.98:0.92	32000	26900	32000	26900	1.00:0.84
223	305	ag|052755|140304CS1900153200001	0.54	21	6	6		408000	414000	407000	490000	529000	533000	630000	653000	659000	288000	278000	296000	910000	911000	905000	403000	401000	389000	253000	252000	251000	288000	320000	317000	431000	435000	451000	185000	189000	198000	570000	565000	560000	288000	296000	280000	0.58:0.58:0.58:0.66:0.74:0.73:0.99:1.00:1.04:0.42:0.43:0.46:1.31:1.30:1.29:0.66:0.68:0.64	525000	554000	333000	348000	1.00:1.04
201	162	ag|100467|CS60.230410CS6000026400002	0.54	6	4	1		108000	113000	101000	118000	113000	122000	105000	112000	112000	0	0	4190	219000	212000	211000	79400	74500	77400	108000	113000	101000	118000	113000	122000	105000	112000	112000	0	0	4190	219000	212000	211000	79400	74500	77400	0.97:1.01:0.90:1.05:1.01:1.09:0.94:1.00:1.00:0:0:0.04:1.96:1.89:1.89:0.71:0.67:0.69	112000	125000	112000	125000	1.00:1.12
171	194	ag|165988|Deer_NM_001034698.2	0.53	18	8	1	Carbamidomethylation	53100	43500	51400	79500	87100	80900	145000	136000	163000	1860	5470	0	79500	96000	81100	146000	145000	172000	53100	43500	51400	79500	87100	80900	145000	136000	163000	1860	5470	0	79500	96000	81100	146000	145000	172000	0.39:0.32:0.38:0.58:0.64:0.59:1.07:1.00:1.20:0.02:0.04:0:0.58:0.71:0.60:1.08:1.07:1.27	93200	90900	93200	90900	1.00:0.98
296	532	ag|104714|CS60.230410CS6000050900001	0.52	13	4	1	Carbamidomethylation; Hydroxylation; Amidination of lysines or N-terminal amines with methyl acetimidate; Beta-methylthiolation (ND)	174000	153000	168000	159000	159000	157000	126000	140000	141000	0	5560	0	276000	283000	237000	138000	152000	137000	174000	153000	168000	159000	159000	157000	126000	140000	141000	0	5560	0	276000	283000	237000	138000	152000	137000	1.24:1.09:1.19:1.13:1.13:1.12:0.90:1.00:1.00:0:0.04:0:1.97:2.02:1.69:0.98:1.08:0.97	153000	175000	153000	175000	1.00:1.15
326	476	ag|011215|NODE_1696375	0.51	19	3	2		102000	113000	101000	88200	92500	89500	220000	216000	218000	150000	144000	154000	70700	47900	89500	169000	176000	183000	102000	113000	101000	88200	92500	89500	220000	216000	218000	150000	144000	154000	70700	47900	89500	169000	176000	183000	0.47:0.52:0.47:0.41:0.43:0.41:1.02:1.00:1.01:0.69:0.67:0.71:0.33:0.22:0.41:0.78:0.81:0.85	138000	139000	138000	139000	1.00:1.01
47	429	ag|101015|CS60.230410CS600000030003E	0.51	21	5	1	Carbamidomethylation; Pyro-glu from Q; Formylation; Deoxy; Ethylation	291000	315000	290000	324000	245000	0	893000	905000	943000	333000	337000	320000	0	0	0	999000	979000	954000	291000	315000	290000	324000	245000	0	893000	905000	943000	333000	337000	320000	0	0	0	999000	979000	954000	0.32:0.35:0.32:0.36:0.27:0:0.99:1.00:1.04:0.37:0.37:0.35:0:0:0:1.10:1.08:1.05	526000	654000	526000	654000	1.00:1.24
534	974	ag|081001|CS60.230410CS6000134300013	0.51	11	1	1		179000	62700	177000	154000	150000	257000	250000	284000	275000	217000	260000	227000	304000	173000	219000	101000	291000	174000	179000	62700	177000	154000	150000	257000	250000	284000	275000	217000	260000	227000	304000	173000	219000	101000	291000	174000	0.63:0.22:0.62:0.54:0.53:0.90:0.88:1.00:0.97:0.76:0.91:0.80:1.07:0.61:0.77:0.36:1.02:0.61	199000	218000	199000	218000	1.00:1.10
534	1037	ag|002806|NODE_1203302	0.51	9	1	1		179000	62700	177000	154000	150000	257000	250000	284000	275000	217000	260000	227000	304000	173000	219000	101000	291000	174000	179000	62700	177000	154000	150000	257000	250000	284000	275000	217000	260000	227000	304000	173000	219000	101000	291000	174000	0.63:0.22:0.62:0.54:0.53:0.90:0.88:1.00:0.97:0.76:0.91:0.80:1.07:0.61:0.77:0.36:1.02:0.61	199000	218000	199000	218000	1.00:1.10
653	1507	ag|114384|CS60.230410CS6000008600003	0.5	7	1	1		36500	44800	26300	0	32300	33600	41200	41800	45700	0	2060	0	65900	68000	69600	52300	49500	46100	36500	44800	26300	0	32300	33600	41200	41800	45700	0	2060	0	65900	68000	69600	52300	49500	46100	0.87:1.07:0.63:0:0.77:0.80:0.99:1.00:1.09:0:0.05:0:1.58:1.63:1.67:1.25:1.19:1.10	37800	50500	37800	50500	1.00:1.34
653	1790	ag|114386|CS60.230410CS6000008600005	0.5	15	1	1		36500	44800	26300	0	32300	33600	41200	41800	45700	0	2060	0	65900	68000	69600	52300	49500	46100	36500	44800	26300	0	32300	33600	41200	41800	45700	0	2060	0	65900	68000	69600	52300	49500	46100	0.87:1.07:0.63:0:0.77:0.80:0.99:1.00:1.09:0:0.05:0:1.58:1.63:1.67:1.25:1.19:1.10	37800	50500	37800	50500	1.00:1.34
653	1791	ag|114385|CS60.230410CS6000008600004	0.5	12	1	1		36500	44800	26300	0	32300	33600	41200	41800	45700	0	2060	0	65900	68000	69600	52300	49500	46100	36500	44800	26300	0	32300	33600	41200	41800	45700	0	2060	0	65900	68000	69600	52300	49500	46100	0.87:1.07:0.63:0:0.77:0.80:0.99:1.00:1.09:0:0.05:0:1.58:1.63:1.67:1.25:1.19:1.10	37800	50500	37800	50500	1.00:1.34
428	907	ag|106068|CS60.230410CS600005710000A	0.5	6	1	1		95000	84600	90900	124000	129000	132000	281000	287000	318000	23200	23500	23400	108000	100000	102000	355000	355000	333000	95000	84600	90900	124000	129000	132000	281000	287000	318000	23200	23500	23400	108000	100000	102000	355000	355000	333000	0.33:0.29:0.32:0.43:0.45:0.46:0.98:1.00:1.11:0.08:0.08:0.08:0.38:0.35:0.35:1.24:1.23:1.16	171000	158000	171000	158000	1.00:0.92
200	455	ag|101800|CS60.230410CS6000034500001	0.5	33	5	5	Carbamidomethylation; Deamidation (NQ)	459000	430000	421000	539000	605000	606000	684000	703000	755000	339000	382000	367000	903000	869000	883000	475000	485000	471000	361000	345000	327000	418000	437000	454000	519000	543000	580000	222000	248000	244000	673000	659000	654000	381000	375000	362000	0.66:0.64:0.60:0.77:0.80:0.83:0.96:1.00:1.07:0.41:0.46:0.45:1.24:1.21:1.20:0.70:0.69:0.67	578000	586000	443000	435000	1.00:0.98
200	456	ag|101801|CS60.230410CS6000034500002	0.5	30	5	5	Carbamidomethylation; Deamidation (NQ)	459000	430000	421000	539000	605000	606000	684000	703000	755000	339000	382000	367000	903000	869000	883000	475000	485000	471000	361000	345000	327000	418000	437000	454000	519000	543000	580000	222000	248000	244000	673000	659000	654000	381000	375000	362000	0.66:0.64:0.60:0.77:0.80:0.83:0.96:1.00:1.07:0.41:0.46:0.45:1.24:1.21:1.20:0.70:0.69:0.67	578000	586000	443000	435000	1.00:0.98
180	206	ag|103071|CS60.230410CS6000042500011	0.48	38	10	4	Carbamidomethylation; Phenethyl isothiocyanate	162000	144000	196000	196000	223000	219000	257000	236000	269000	130000	167000	158000	244000	386000	328000	64300	72400	107000	111000	98800	144000	155000	171000	173000	193000	225000	198000	130000	167000	158000	150000	296000	243000	64300	72400	94000	0.49:0.44:0.64:0.69:0.76:0.77:0.86:1.00:0.88:0.58:0.75:0.70:0.67:1.32:1.08:0.29:0.32:0.42	211000	314000	163000	244000	1.00:1.50
317	687	ag|098933|CS60.230410CS6000015700006	0.48	12	3	3	Carbamidomethylation; Deamidation (NQ)	230000	225000	234000	262000	294000	274000	360000	325000	324000	163000	167000	194000	399000	384000	340000	174000	164000	170000	230000	225000	234000	262000	294000	274000	312000	325000	324000	163000	167000	194000	399000	384000	261000	174000	164000	170000	0.71:0.69:0.72:0.81:0.91:0.84:0.96:1.00:1.00:0.50:0.52:0.60:1.23:1.18:0.80:0.54:0.51:0.52	324000	351000	276000	272000	1.00:0.99
100	242	ag|102302|CS60.230410CS600000380001B	0.48	44	7	6	Carbamidomethylation; Deamidation (NQ)	2160000	2020000	2290000	1840000	2930000	3020000	2950000	3030000	2900000	1800000	1560000	1890000	3850000	3620000	4050000	2620000	1630000	2510000	1740000	1770000	1760000	988000	1940000	2050000	2040000	2140000	2160000	1290000	1080000	1440000	2580000	2450000	2710000	1780000	875000	1780000	0.81:0.83:0.82:0.46:0.91:0.96:0.96:1.00:1.01:0.60:0.50:0.67:1.21:1.15:1.27:0.83:0.41:0.83	2770000	2850000	1940000	1910000	1.00:0.99
619	1185	ag|030305|NODE_366137	0.47	5	1	1	Deamidation (NQ)	2170	0	2550	3970	5280	5090	8660	7580	7570	0	0	0	14100	15700	12200	3420	0	3350	2170	0	2550	3970	5280	5090	8660	7580	7570	0	0	0	14100	15700	12200	3420	0	3350	0.29:0:0.34:0.52:0.70:0.67:1.14:1.00:1.00:0:0:0:1.86:2.07:1.61:0.45:0:0.44	5360	9740	5360	9740	1.00:1.82
619	1251	ag|186163|Deer_XM_019964619.1	0.47	9	1	1	Deamidation (NQ)	2170	0	2550	3970	5280	5090	8660	7580	7570	0	0	0	14100	15700	12200	3420	0	3350	2170	0	2550	3970	5280	5090	8660	7580	7570	0	0	0	14100	15700	12200	3420	0	3350	0.29:0:0.34:0.52:0.70:0.67:1.14:1.00:1.00:0:0:0:1.86:2.07:1.61:0.45:0:0.44	5360	9740	5360	9740	1.00:1.82
297	524	ag|139496|Deer_XM_018046433.1	0.47	11	4	4	Carbamidomethylation	264000	256000	273000	289000	302000	305000	454000	469000	463000	289000	297000	330000	437000	474000	408000	368000	358000	297000	207000	204000	224000	238000	250000	248000	370000	383000	379000	235000	249000	280000	344000	379000	310000	295000	286000	225000	0.54:0.53:0.58:0.62:0.65:0.65:0.97:1.00:0.99:0.61:0.65:0.73:0.90:0.99:0.81:0.77:0.75:0.59	342000	362000	278000	289000	1.00:1.04
341	1231	ag|053062|140304CS1901710500001	0.46	14	2	2	Carbamidomethylation	46400	54600	62000	109000	118000	121000	98100	89800	85700	70700	70800	74200	145000	142000	130000	62500	62000	62600	46400	54600	62000	109000	118000	121000	98100	89800	85700	70700	70800	74200	145000	142000	130000	62500	62000	62600	0.52:0.61:0.69:1.21:1.32:1.35:1.09:1.00:0.95:0.79:0.79:0.83:1.62:1.59:1.45:0.70:0.69:0.70	89400	91200	89400	91200	1.00:1.02
540	1300	ag|103368|CS60.230410CS6000004400021	0.43	25	2	1	Carbamidomethylation; Deamidation (NQ); Dehydration; Beta-methylthiolation (ND)	46400	14000	0	161000	168000	173000	156000	147000	140000	89600	91100	0	233000	232000	211000	101000	94700	98700	46400	14000	0	161000	168000	173000	156000	147000	140000	89600	91100	0	233000	232000	211000	101000	94700	98700	0.32:0.10:0:1.10:1.15:1.18:1.07:1.00:0.96:0.61:0.62:0:1.59:1.58:1.44:0.69:0.65:0.67	126000	144000	126000	144000	1.00:1.14
524	17058	tr|A0A212C005|A0A212C005_CEREH	0.43	21	3	1	Carbamidomethylation	95600	99500	106000	110000	126000	121000	153000	154000	155000	146000	136000	144000	172000	156000	129000	126000	130000	141000	95600	99500	106000	110000	126000	121000	153000	154000	155000	146000	136000	144000	172000	156000	129000	126000	130000	141000	0.62:0.65:0.69:0.71:0.82:0.78:0.99:1.00:1.01:0.95:0.88:0.94:1.12:1.01:0.83:0.82:0.84:0.92	124000	142000	124000	142000	1.00:1.14
50	374	ag|133219|sp|P21379|HBA_RANTA	0.43	59	8	2	Amidination of lysines or N-terminal amines with methyl acetimidate; Oxidation (M)	6700000	6770000	6390000	4070000	4290000	4480000	2550000	2640000	2730000	8390000	8370000	8230000	3110000	3110000	3250000	9680000	9450000	9350000	6610000	6670000	6310000	2570000	2720000	2850000	2470000	2550000	2650000	2020000	1980000	1990000	2080000	2090000	2130000	9600000	9380000	9280000	2.60:2.62:2.48:1.01:1.07:1.12:0.97:1.00:1.04:0.79:0.78:0.78:0.82:0.82:0.84:3.77:3.68:3.65	4510000	6990000	3930000	4500000	1.00:1.15
50	375	ag|133217|sp|P01971|HBA_ALCAA	0.43	58	8	2	Amidination of lysines or N-terminal amines with methyl acetimidate; Oxidation (M)	6700000	6770000	6390000	4070000	4290000	4480000	2550000	2640000	2730000	8390000	8370000	8230000	3110000	3110000	3250000	9680000	9450000	9350000	6610000	6670000	6310000	2570000	2720000	2850000	2470000	2550000	2650000	2020000	1980000	1990000	2080000	2090000	2130000	9600000	9380000	9280000	2.60:2.62:2.48:1.01:1.07:1.12:0.97:1.00:1.04:0.79:0.78:0.78:0.82:0.82:0.84:3.77:3.68:3.65	4510000	6990000	3930000	4500000	1.00:1.15
197	228	ag|027297|NODE_2557560	0.4	24	5	5	Carbamidomethylation	409000	347000	422000	524000	558000	592000	687000	722000	737000	415000	390000	375000	707000	622000	686000	426000	429000	432000	319000	260000	325000	366000	385000	413000	501000	525000	545000	344000	338000	357000	516000	515000	499000	328000	324000	315000	0.61:0.50:0.62:0.70:0.73:0.79:0.95:1.00:1.04:0.66:0.64:0.68:0.98:0.98:0.95:0.62:0.62:0.60	555000	511000	404000	393000	1.00:0.97
313	530	ag|052482|140304CS1901210600001	0.4	12	3	3	Carbamidomethylation	220000	202000	231000	385000	397000	400000	505000	533000	533000	138000	126000	133000	688000	642000	646000	302000	301000	314000	220000	202000	231000	385000	397000	400000	505000	533000	533000	138000	126000	133000	688000	642000	646000	302000	301000	314000	0.41:0.38:0.43:0.72:0.74:0.75:0.95:1.00:1.00:0.26:0.24:0.25:1.29:1.21:1.21:0.57:0.57:0.59	378000	427000	378000	427000	1.00:1.13
134	217	ag|094343|CS60.230410CS6000014500003	0.38	39	9	5	Carbamidomethylation	2570000	2280000	2340000	2240000	2150000	3170000	2940000	3200000	3110000	2770000	2030000	2430000	2560000	3680000	2570000	2820000	2510000	1990000	2550000	2270000	2310000	1990000	1870000	2890000	2780000	3030000	2950000	2750000	2020000	2410000	2190000	3310000	2220000	2690000	2410000	1860000	0.84:0.75:0.76:0.66:0.62:0.95:0.92:1.00:0.97:0.91:0.67:0.79:0.72:1.09:0.73:0.89:0.79:0.61	2850000	2630000	2670000	2460000	1.00:0.92
202	386	ag|100179|CS60.230410CS6000024300003	0.38	23	5	3		181000	184000	182000	239000	262000	264000	279000	292000	297000	117000	100000	116000	426000	414000	420000	223000	228000	209000	181000	184000	182000	239000	262000	264000	279000	292000	297000	117000	100000	116000	426000	414000	420000	223000	228000	209000	0.62:0.63:0.63:0.82:0.90:0.91:0.96:1.00:1.02:0.40:0.34:0.40:1.46:1.42:1.44:0.76:0.78:0.72	242000	259000	242000	259000	1.00:1.07
375	514	ag|044322|140304CS1901068400001	0.37	12	3	3		154000	225000	211000	112000	116000	128000	116000	125000	127000	63800	67800	69000	355000	336000	275000	69200	62700	63500	154000	225000	211000	112000	116000	128000	116000	125000	127000	63800	67800	69000	355000	336000	275000	69200	62700	63500	1.24:1.81:1.69:0.90:0.93:1.02:0.93:1.00:1.02:0.51:0.54:0.55:2.85:2.70:2.21:0.56:0.50:0.51	201000	272000	201000	272000	1.00:1.35
566	1682	ag|051259|140304CS1900431400001	0.36	5	1	1		62700	69300	56700	67200	64000	70600	104000	126000	105000	90800	75500	75400	0	0	0	157000	129000	121000	62700	69300	56700	67200	64000	70600	104000	126000	105000	90800	75500	75400	0	0	0	157000	129000	121000	0.50:0.55:0.45:0.53:0.51:0.56:0.82:1.00:0.84:0.72:0.60:0.60:0:0:0:1.24:1.02:0.96	80600	108000	80600	108000	1.00:1.34
212	493	ag|109623|CS60.230410CS6000070500006	0.36	11	5	1	Carbamidomethylation	391000	426000	370000	305000	277000	330000	401000	401000	430000	467000	480000	478000	250000	280000	272000	515000	480000	495000	391000	426000	370000	305000	277000	330000	401000	401000	430000	467000	480000	478000	250000	280000	272000	515000	480000	495000	0.97:1.06:0.92:0.76:0.69:0.82:1.00:1.00:1.07:1.16:1.20:1.19:0.62:0.70:0.68:1.28:1.20:1.24	370000	413000	370000	413000	1.00:1.12
115	88	ag|168773|Deer_NM_001285732.1	0.35	30	10	5		690000	700000	659000	562000	786000	620000	744000	787000	726000	393000	362000	390000	1080000	1570000	1110000	472000	494000	502000	576000	586000	545000	435000	457000	484000	570000	602000	538000	372000	339000	365000	794000	832000	830000	358000	385000	386000	0.96:0.97:0.91:0.72:0.76:0.80:0.95:1.00:0.89:0.62:0.56:0.61:1.32:1.38:1.38:0.59:0.64:0.64	697000	780000	533000	553000	1.00:1.04
214	548	ag|148564|Deer_XM_005691157.3	0.34	14	5	1	Carbamidomethylation; Hexose (NSY)	0	0	95900	175000	185000	189000	186000	230000	203000	183000	159000	181000	57900	72300	0	203000	140000	139000	0	0	95900	175000	185000	189000	186000	230000	203000	183000	159000	181000	57900	72300	0	203000	140000	139000	0:0:0.42:0.76:0.80:0.83:0.81:1.00:0.88:0.80:0.69:0.79:0.25:0.31:0:0.88:0.61:0.61	181000	142000	181000	142000	1.00:0.79
214	558	ag|167886|Deer_NM_001033626.1	0.34	25	5	1	Carbamidomethylation; Hexose (NSY)	0	0	95900	175000	185000	189000	186000	230000	203000	183000	159000	181000	57900	72300	0	203000	140000	139000	0	0	95900	175000	185000	189000	186000	230000	203000	183000	159000	181000	57900	72300	0	203000	140000	139000	0:0:0.42:0.76:0.80:0.83:0.81:1.00:0.88:0.80:0.69:0.79:0.25:0.31:0:0.88:0.61:0.61	181000	142000	181000	142000	1.00:0.79
570	1359	ag|052329|140304CS1901484100001	0.33	3	1	1		49000	48600	49800	42800	44700	45200	66000	65900	66500	11500	13600	13500	102000	102000	98700	65100	63600	61800	49000	48600	49800	42800	44700	45200	66000	65900	66500	11500	13600	13500	102000	102000	98700	65100	63600	61800	0.74:0.74:0.76:0.65:0.68:0.69:1.00:1.00:1.01:0.17:0.21:0.20:1.55:1.54:1.50:0.99:0.97:0.94	53200	59000	53200	59000	1.00:1.11
570	1458	ag|101678|CS60.230410CS6000033800003	0.33	4	1	1		49000	48600	49800	42800	44700	45200	66000	65900	66500	11500	13600	13500	102000	102000	98700	65100	63600	61800	49000	48600	49800	42800	44700	45200	66000	65900	66500	11500	13600	13500	102000	102000	98700	65100	63600	61800	0.74:0.74:0.76:0.65:0.68:0.69:1.00:1.00:1.01:0.17:0.21:0.20:1.55:1.54:1.50:0.99:0.97:0.94	53200	59000	53200	59000	1.00:1.11
643	1281	ag|029099|NODE_26936	0.31	2	1	1		15300	0	0	8240	0	0	0	12800	14400	0	0	0	0	0	0	19200	18000	18400	15300	0	0	8240	0	0	0	12800	14400	0	0	0	0	0	0	19200	18000	18400	1.20:0:0:0.64:0:0:0:1.00:1.12:0:0:0:0:0:0:1.50:1.41:1.44	12700	18500	12700	18500	1.00:1.46
63	145	ag|023255|NODE_2382957	0.31	64	13	1		366000	401000	313000	297000	507000	262000	573000	368000	389000	281000	312000	324000	428000	544000	493000	530000	400000	447000	366000	401000	313000	297000	507000	262000	573000	368000	389000	281000	312000	324000	428000	544000	493000	530000	400000	447000	0.99:1.09:0.85:0.81:1.38:0.71:1.56:1.00:1.06:0.76:0.85:0.88:1.16:1.48:1.34:1.44:1.09:1.21	596000	524000	596000	524000	1.00:0.88
492	971	ag|052935|140304CS1901683300002	0.3	8	1	1	Carbamidomethylation	127000	215000	121000	174000	116000	98600	178000	174000	185000	145000	143000	121000	175000	198000	195000	123000	83600	78200	127000	215000	121000	174000	116000	98600	178000	174000	185000	145000	143000	121000	175000	198000	195000	123000	83600	78200	0.73:1.24:0.70:1.00:0.67:0.57:1.02:1.00:1.06:0.83:0.82:0.70:1.01:1.14:1.12:0.71:0.48:0.45	154000	140000	154000	140000	1.00:0.91
459	919	ag|107557|CS60.230410CS600006280000B	0.3	12	2	2		204000	279000	337000	244000	211000	306000	228000	76800	269000	2510	67800	19700	382000	382000	288000	392000	326000	218000	204000	279000	337000	244000	211000	306000	228000	76800	269000	2510	67800	19700	382000	382000	288000	392000	326000	218000	2.65:3.63:4.38:3.17:2.74:3.98:2.97:1.00:3.51:0.03:0.88:0.26:4.97:4.97:3.74:5.10:4.24:2.84	249000	299000	249000	299000	1.00:1.20
522	17015	tr|A0A212DII4|A0A212DII4_CEREH	0.29	27	5	1		81300	80900	80100	55100	59800	61100	137000	143000	150000	0	0	0	88300	83900	79300	172000	182000	170000	81300	80900	80100	55100	59800	61100	137000	143000	150000	0	0	0	88300	83900	79300	172000	182000	170000	0.57:0.57:0.56:0.39:0.42:0.43:0.96:1.00:1.05:0:0:0:0.62:0.59:0.55:1.20:1.27:1.19	94400	129000	94400	129000	1.00:1.37
91	111	ag|053198|140304CS1901020900001	0.28	33	12	12	Deamidation (NQ)	2980000	2810000	3140000	2430000	2620000	3160000	3010000	2970000	3310000	1520000	1890000	1530000	5330000	5420000	5750000	2140000	2060000	2390000	1480000	1490000	1650000	1060000	1090000	1590000	1330000	1230000	1450000	587000	588000	581000	2600000	2590000	2610000	845000	825000	802000	1.20:1.21:1.34:0.86:0.88:1.29:1.08:1.00:1.17:0.48:0.48:0.47:2.11:2.11:2.11:0.69:0.67:0.65	3050000	3420000	1410000	1440000	1.00:1.02
44	353	ag|100999|CS60.230410CS600000030002E	0.27	26	6	1	Carbamidomethylation; Formylation; Deoxy; Ethylation	97400	163000	151000	164000	174000	186000	433000	440000	441000	0	0	0	152000	134000	172000	538000	541000	529000	97400	163000	151000	164000	174000	186000	433000	440000	441000	0	0	0	152000	134000	172000	538000	541000	529000	0.22:0.37:0.34:0.37:0.40:0.42:0.98:1.00:1.00:0:0:0:0.34:0.30:0.39:1.22:1.23:1.20	250000	344000	250000	344000	1.00:1.38
260	401	ag|048171|140304CS1900596400001	0.26	12	3	1		105000	117000	108000	110000	117000	116000	93400	92200	95100	89000	84700	88000	167000	173000	162000	51100	51300	55000	105000	117000	108000	110000	117000	116000	93400	92200	95100	89000	84700	88000	167000	173000	162000	51100	51300	55000	1.13:1.27:1.17:1.19:1.27:1.26:1.01:1.00:1.03:0.97:0.92:0.95:1.81:1.87:1.76:0.55:0.56:0.60	106000	102000	106000	102000	1.00:0.97
340	16969	tr|F1MRZ6|F1MRZ6_BOVIN	0.24	10	16	2	Carbamidomethylation; Methylation(others); Ubiquitin	263000	264000	238000	245000	219000	150000	325000	333000	374000	42700	46400	144000	664000	661000	646000	150000	75400	89000	263000	264000	238000	245000	219000	150000	325000	333000	374000	42700	46400	144000	664000	661000	646000	150000	75400	89000	0.79:0.79:0.72:0.74:0.66:0.45:0.98:1.00:1.12:0.13:0.14:0.43:2.00:1.99:1.94:0.45:0.23:0.27	293000	360000	293000	360000	1.00:1.23
283	309	ag|052976|140304CS1900014000001	0.24	16	4	4		85100	70300	108000	152000	136000	157000	178000	192000	352000	36500	39800	39700	372000	289000	366000	100000	106000	101000	85100	70300	108000	152000	136000	157000	178000	192000	202000	36500	39800	39700	274000	289000	266000	100000	106000	101000	0.44:0.37:0.56:0.79:0.71:0.82:0.93:1.00:1.06:0.19:0.21:0.21:1.43:1.51:1.39:0.52:0.55:0.53	292000	262000	142000	162000	1.00:1.14
486	1945	ag|041537|NODE_944840	0.23	22	1	1	Carbamidomethylation; Hydroxylation	532000	549000	553000	0	609000	611000	0	610000	647000	109000	104000	116000	535000	543000	564000	777000	831000	836000	532000	549000	553000	0	609000	611000	0	610000	647000	109000	104000	116000	535000	543000	564000	777000	831000	836000	0.87:0.90:0.91:0:1.00:1.00:0:1.00:1.06:0.18:0.17:0.19:0.88:0.89:0.92:1.27:1.36:1.37	587000	491000	587000	491000	1.00:0.84
641	2143	ag|041709|NODE_949217	0.22	7	1	1		356000	378000	346000	334000	360000	378000	209000	213000	226000	323000	315000	316000	379000	407000	377000	307000	297000	277000	356000	378000	346000	334000	360000	378000	209000	213000	226000	323000	315000	316000	379000	407000	377000	307000	297000	277000	1.68:1.78:1.63:1.57:1.69:1.78:0.98:1.00:1.06:1.52:1.48:1.49:1.78:1.91:1.77:1.45:1.40:1.30	311000	333000	311000	333000	1.00:1.07
395	1081	ag|068770|CS60.230410CS6000123500015	0.22	15	2	1		119000	128000	116000	110000	106000	122000	267000	271000	278000	160000	172000	158000	102000	97700	96300	288000	273000	275000	119000	128000	116000	110000	106000	122000	267000	271000	278000	160000	172000	158000	102000	97700	96300	288000	273000	275000	0.44:0.47:0.43:0.40:0.39:0.45:0.98:1.00:1.02:0.59:0.63:0.58:0.38:0.36:0.35:1.06:1.01:1.01	168000	180000	168000	180000	1.00:1.07
559	1476	ag|148253|Deer_XM_018066347.1	0.21	5	1	1		8560	8430	9590	10400	10600	12300	14200	12000	12300	1040	0	544	23000	29900	27700	3280	3740	2810	8560	8430	9590	10400	10600	12300	14200	12000	12300	1040	0	544	23000	29900	27700	3280	3740	2810	0.71:0.70:0.80:0.87:0.88:1.02:1.18:1.00:1.02:0.09:0:0.05:1.91:2.48:2.30:0.27:0.31:0.23	10900	11500	10900	11500	1.00:1.05
539	1167	ag|110017|CS60.230410CS600007190000D	0.2	5	2	1	Carbamidomethylation	14600	12600	16600	33200	30800	45200	52900	38900	54700	0	0	0	90100	89800	85100	18500	21500	14700	14600	12600	16600	33200	30800	45200	52900	38900	54700	0	0	0	90100	89800	85100	18500	21500	14700	0.38:0.32:0.43:0.85:0.79:1.16:1.36:1.00:1.41:0:0:0:2.32:2.31:2.19:0.48:0.55:0.38	33300	53300	33300	53300	1.00:1.60
320	329	ag|044505|140304CS1901330900001	0.2	4	3	3		117000	124000	119000	110000	106000	114000	139000	144000	139000	132000	72900	61200	181000	172000	182000	75900	128000	126000	117000	124000	119000	110000	106000	114000	139000	144000	139000	132000	72900	61200	181000	172000	182000	75900	128000	126000	0.81:0.86:0.82:0.76:0.73:0.79:0.96:1.00:0.96:0.91:0.51:0.42:1.26:1.19:1.26:0.53:0.89:0.87	125000	136000	125000	136000	1.00:1.09
290	442	ag|105002|CS60.230410CS6000052300009	0.2	6	2	2	Carbamidomethylation	143000	141000	124000	251000	273000	277000	293000	261000	279000	313000	335000	355000	203000	207000	190000	138000	130000	127000	143000	141000	124000	251000	273000	277000	293000	261000	279000	313000	335000	355000	203000	207000	190000	138000	130000	127000	0.55:0.54:0.48:0.96:1.05:1.06:1.12:1.00:1.07:1.20:1.28:1.36:0.78:0.79:0.73:0.53:0.50:0.49	227000	222000	227000	222000	1.00:0.98
458	694	ag|102751|CS60.230410CS6000040500003	0.19	13	2	2		47700	66500	146000	114000	83400	92200	141000	107000	153000	231000	102000	232000	163000	0	62900	62800	110000	24600	47700	66500	146000	114000	83400	92200	141000	107000	153000	231000	102000	232000	163000	0	62900	62800	110000	24600	0.45:0.62:1.37:1.07:0.78:0.86:1.32:1.00:1.44:2.17:0.95:2.18:1.52:0:0.59:0.59:1.03:0.23	112000	133000	112000	133000	1.00:1.18
218	166	ag|051743|140304CS1901047700002	0.19	7	4	2		186000	193000	178000	61200	164000	71000	259000	264000	265000	25300	27500	22200	373000	373000	389000	138000	133000	131000	186000	193000	178000	61200	164000	71000	259000	264000	265000	25300	27500	22200	373000	373000	389000	138000	133000	131000	0.70:0.73:0.68:0.23:0.62:0.27:0.98:1.00:1.00:0.10:0.10:0.08:1.41:1.41:1.47:0.52:0.50:0.49	182000	202000	182000	202000	1.00:1.11
337	632	ag|026998|NODE_2551031	0.18	26	4	1	Carbamidomethylation	106000	107000	99500	57100	59200	63400	96500	94300	106000	11400	11300	10500	228000	239000	219000	42700	39700	40200	106000	107000	99500	57100	59200	63400	96500	94300	106000	11400	11300	10500	228000	239000	219000	42700	39700	40200	1.12:1.14:1.05:0.61:0.63:0.67:1.02:1.00:1.12:0.12:0.12:0.11:2.42:2.53:2.33:0.45:0.42:0.43	87700	93600	87700	93600	1.00:1.07
300	16968	tr|A0A212DG66|A0A212DG66_CEREH	0.17	17	43	1		118000	133000	94300	91800	130000	0	177000	180000	177000	155000	172000	189000	169000	140000	141000	101000	0	93900	118000	133000	94300	91800	130000	0	177000	180000	177000	155000	172000	189000	169000	140000	141000	101000	0	93900	0.65:0.74:0.52:0.51:0.72:0:0.98:1.00:0.99:0.86:0.95:1.05:0.94:0.78:0.78:0.56:0:0.52	138000	145000	138000	145000	1.00:1.06
434	496	ag|104890|CS60.230410CS6000051700002	0.15	4	1	1		143000	144000	139000	120000	113000	126000	133000	138000	146000	146000	158000	145000	161000	163000	167000	102000	96200	86800	143000	144000	139000	120000	113000	126000	133000	138000	146000	146000	158000	145000	161000	163000	167000	102000	96200	86800	1.03:1.04:1.01:0.87:0.82:0.91:0.96:1.00:1.05:1.05:1.14:1.04:1.16:1.18:1.21:0.74:0.69:0.63	134000	136000	134000	136000	1.00:1.02
355	443	ag|051835|140304CS1901297800001	0.12	8	2	2		263000	325000	261000	71400	75500	86000	249000	330000	317000	230000	48300	82400	430000	403000	409000	249000	52800	47500	263000	325000	261000	71400	75500	86000	249000	330000	317000	230000	48300	82400	430000	403000	409000	249000	52800	47500	0.80:0.98:0.79:0.22:0.23:0.26:0.75:1.00:0.96:0.70:0.15:0.25:1.30:1.22:1.24:0.75:0.16:0.14	284000	313000	284000	313000	1.00:1.10
355	444	ag|185149|Deer_XM_004015373.2	0.12	7	2	2		263000	325000	261000	71400	75500	86000	249000	330000	317000	230000	48300	82400	430000	403000	409000	249000	52800	47500	263000	325000	261000	71400	75500	86000	249000	330000	317000	230000	48300	82400	430000	403000	409000	249000	52800	47500	0.80:0.98:0.79:0.22:0.23:0.26:0.75:1.00:0.96:0.70:0.15:0.25:1.30:1.22:1.24:0.75:0.16:0.14	284000	313000	284000	313000	1.00:1.10
556	1583	ag|106125|CS60.230410CS6000057400006	0.11	10	1	1	Pyro-glu from Q	1270	1270	1510	2520	3320	3770	9870	12400	11000	2540	3650	3890	0	11200	8950	5970	5330	6420	1270	1270	1510	2520	3320	3770	9870	12400	11000	2540	3650	3890	0	11200	8950	5970	5330	6420	0.10:0.10:0.12:0.20:0.27:0.30:0.79:1.00:0.88:0.20:0.29:0.31:0:0.90:0.72:0.48:0.43:0.52	5210	5990	5210	5990	1.00:1.15
556	1584	ag|135340|Deer_XM_018055266.1	0.11	8	1	1	Pyro-glu from Q	1270	1270	1510	2520	3320	3770	9870	12400	11000	2540	3650	3890	0	11200	8950	5970	5330	6420	1270	1270	1510	2520	3320	3770	9870	12400	11000	2540	3650	3890	0	11200	8950	5970	5330	6420	0.10:0.10:0.12:0.20:0.27:0.30:0.79:1.00:0.88:0.20:0.29:0.31:0:0.90:0.72:0.48:0.43:0.52	5210	5990	5210	5990	1.00:1.15
473	949	ag|045826|140304CS1901142300001	0.11	6	1	1		42000	31200	45200	39200	34700	44100	37300	44100	55700	3970	13400	0	91300	86300	92500	29000	30700	30700	42000	31200	45200	39200	34700	44100	37300	44100	55700	3970	13400	0	91300	86300	92500	29000	30700	30700	0.95:0.71:1.03:0.89:0.79:1.00:0.85:1.00:1.26:0.09:0.30:0:2.07:1.96:2.10:0.66:0.70:0.70	41500	47200	41500	47200	1.00:1.14
8	118	ag|155656|Deer_XM_005681744.2	0.08	35	18	3	Carbamidomethylation; Deamidation (NQ); Pyro-glu from Q; Formylation; Replacement of 2 protons by calcium; 5 more	35900000	28900000	34300000	25400000	27000000	28100000	41500000	42700000	23900000	6380000	6480000	10400000	27000000	27000000	27300000	30300000	45400000	28800000	16300000	20700000	14700000	17900000	19200000	19900000	20900000	21600000	707000	5950000	6080000	5880000	20800000	20800000	21000000	26200000	24100000	24900000	0.75:0.95:0.68:0.83:0.89:0.92:0.97:1.00:0.03:0.28:0.28:0.27:0.96:0.96:0.97:1.21:1.12:1.15	32100000	25200000	17000000	17300000	1.00:1.02
367	762	ag|023825|NODE_2393972	0.08	9	2	2	Carbamidomethylation	333000	126000	149000	208000	219000	211000	345000	336000	319000	293000	313000	137000	419000	353000	367000	119000	88100	176000	333000	126000	149000	208000	219000	211000	345000	336000	319000	293000	313000	137000	419000	353000	367000	119000	88100	176000	0.99:0.37:0.44:0.62:0.65:0.63:1.03:1.00:0.95:0.87:0.93:0.41:1.25:1.05:1.09:0.36:0.26:0.52	263000	304000	263000	304000	1.00:1.15
196	61	ag|160844|Deer_XM_005226483.2	0.07	9	6	4		346000	369000	390000	318000	355000	337000	341000	369000	301000	117000	145000	150000	571000	605000	551000	394000	382000	414000	346000	368000	383000	258000	275000	271000	321000	351000	290000	101000	125000	134000	482000	492000	473000	353000	342000	382000	0.99:1.05:1.09:0.74:0.78:0.77:0.92:1.00:0.83:0.29:0.36:0.38:1.37:1.40:1.35:1.01:0.98:1.09	351000	370000	318000	320000	1.00:1.01
33	39	ag|050281|140304CS1901028600001	0.07	33	21	16	Carbamidomethylation; Pyro-glu from Q	5140000	4870000	4850000	6540000	6790000	7020000	7890000	7650000	7700000	3370000	4200000	3390000	6930000	6960000	7020000	6150000	6030000	6400000	1670000	1570000	1560000	2180000	2300000	2380000	2930000	3060000	3210000	1020000	1900000	1090000	3010000	2910000	2880000	2790000	2730000	2650000	0.55:0.51:0.51:0.71:0.75:0.78:0.96:1.00:1.05:0.33:0.62:0.36:0.98:0.95:0.94:0.91:0.89:0.87	6540000	6040000	2320000	2560000	1.00:1.10
552	1333	ag|112445|CS60.230410CS6000080500011	0.06	5	1	1		13300	12600	21700	4530	66700	66500	0	47600	32400	68500	0	65300	75300	0	0	4470	46300	0	13300	12600	21700	4530	66700	66500	0	47600	32400	68500	0	65300	75300	0	0	4470	46300	0	0.28:0.26:0.46:0.10:1.40:1.40:0:1.00:0.68:1.44:0:1.37:1.58:0:0:0.09:0.97:0	33200	52000	33200	52000	1.00:1.57
266	465	ag|181800|Deer_XM_012132754.2	0.04	9	2	1	Carbamidomethylation	76100	75000	0	67200	64500	69900	91700	93700	104000	79800	92100	80300	0	102000	97200	63000	60100	58800	76100	75000	0	67200	64500	69900	91700	93700	104000	79800	92100	80300	0	102000	97200	63000	60100	58800	0.81:0.80:0:0.72:0.69:0.75:0.98:1.00:1.11:0.85:0.98:0.86:0:1.08:1.04:0.67:0.64:0.63	80300	79100	80300	79100	1.00:0.99
308	497	ag|013593|NODE_1844528	0.04	35	3	3		225000	233000	234000	474000	465000	500000	689000	669000	732000	398000	444000	417000	584000	564000	575000	416000	416000	391000	225000	233000	234000	474000	465000	500000	689000	669000	732000	398000	444000	417000	584000	564000	575000	416000	416000	391000	0.34:0.35:0.35:0.71:0.69:0.75:1.03:1.00:1.09:0.59:0.66:0.62:0.87:0.84:0.86:0.62:0.62:0.58	469000	467000	469000	467000	1.00:1.00
348	737	ag|053424|140304CS1901306000001	0.04	6	1	1		235000	243000	233000	241000	249000	260000	128000	134000	153000	178000	190000	202000	361000	353000	343000	120000	0	106000	235000	243000	233000	241000	249000	260000	128000	134000	153000	178000	190000	202000	361000	353000	343000	120000	0	106000	1.75:1.81:1.73:1.79:1.86:1.93:0.95:1.00:1.14:1.32:1.41:1.50:2.69:2.63:2.56:0.89:0:0.79	208000	231000	208000	231000	1.00:1.11
183	105	ag|053457|140304CS1901060400001	0.04	17	9	9		556000	657000	604000	637000	679000	704000	913000	984000	932000	415000	516000	464000	1370000	1350000	1370000	547000	793000	787000	300000	373000	332000	314000	325000	320000	481000	590000	482000	246000	242000	266000	636000	635000	645000	275000	297000	288000	0.51:0.63:0.56:0.53:0.55:0.54:0.82:1.00:0.82:0.42:0.41:0.45:1.08:1.08:1.09:0.47:0.50:0.49	763000	975000	391000	422000	1.00:1.08
286	408	ag|104393|CS60.230410CS6000049200003	0.04	19	3	2		244000	216000	197000	69400	238000	246000	93100	59800	217000	0	0	0	385000	355000	428000	146000	170000	90000	244000	216000	197000	69400	238000	246000	93100	59800	217000	0	0	0	385000	355000	428000	146000	170000	90000	4.09:3.62:3.30:1.16:3.99:4.11:1.56:1.00:3.63:0:0:0:6.44:5.94:7.15:2.44:2.83:1.51	226000	276000	226000	276000	1.00:1.22
173	295	ag|137281|Deer_XM_018052355.1	0.03	27	5	4	Carbamidomethylation	385000	371000	376000	441000	507000	487000	590000	646000	672000	527000	349000	509000	621000	663000	670000	388000	405000	383000	321000	318000	313000	339000	366000	376000	472000	513000	541000	424000	245000	413000	485000	533000	526000	306000	319000	301000	0.63:0.62:0.61:0.66:0.71:0.73:0.92:1.00:1.05:0.83:0.48:0.80:0.94:1.04:1.02:0.60:0.62:0.59	497000	521000	396000	414000	1.00:1.05
7	219	ag|052058|140304CS19010096FFFDD	0.03	72	12	1	Deamidation (NQ); Hydroxylation; Formylation; Methylation(others); Replacement of 2 protons by iron; Dihydroxy	3330000	3410000	3210000	2690000	2870000	2970000	3750000	3820000	3980000	2580000	2580000	2530000	3190000	3200000	3190000	4300000	4210000	4070000	3330000	3410000	3210000	2690000	2870000	2970000	3750000	3820000	3980000	2580000	2580000	2530000	3190000	3200000	3190000	4300000	4210000	4070000	0.87:0.89:0.84:0.70:0.75:0.78:0.98:1.00:1.04:0.68:0.68:0.66:0.83:0.84:0.83:1.13:1.10:1.07	3340000	3320000	3340000	3320000	1.00:0.99
531	17005	tr|L8HVY9|L8HVY9_9CETA	0.03	16	4	2	Carbamidomethylation	551000	552000	528000	432000	472000	477000	613000	618000	629000	440000	462000	450000	386000	376000	373000	825000	773000	802000	551000	552000	528000	432000	472000	477000	613000	618000	629000	440000	462000	450000	386000	376000	373000	825000	773000	802000	0.89:0.89:0.85:0.70:0.76:0.77:0.99:1.00:1.02:0.71:0.75:0.73:0.63:0.61:0.60:1.34:1.25:1.30	541000	543000	541000	543000	1.00:1.00
427	17050	tr|I7CT57|I7CT57_BOVIN	0.02	25	7	1	Carbamidomethylation	497000	531000	479000	466000	475000	469000	782000	798000	690000	654000	593000	602000	271000	283000	263000	755000	850000	955000	497000	531000	479000	466000	475000	469000	782000	798000	690000	654000	593000	602000	271000	283000	263000	755000	850000	955000	0.62:0.67:0.60:0.58:0.60:0.59:0.98:1.00:0.86:0.82:0.74:0.75:0.34:0.36:0.33:0.95:1.07:1.20	576000	581000	576000	581000	1.00:1.01
427	17051	sp|Q3MHN5|VTDB_BOVIN	0.02	25	7	1	Carbamidomethylation	497000	531000	479000	466000	475000	469000	782000	798000	690000	654000	593000	602000	271000	283000	263000	755000	850000	955000	497000	531000	479000	466000	475000	469000	782000	798000	690000	654000	593000	602000	271000	283000	263000	755000	850000	955000	0.62:0.67:0.60:0.58:0.60:0.59:0.98:1.00:0.86:0.82:0.74:0.75:0.34:0.36:0.33:0.95:1.07:1.20	576000	581000	576000	581000	1.00:1.01
427	17052	tr|F1N5M2|F1N5M2_BOVIN	0.02	25	7	1	Carbamidomethylation	497000	531000	479000	466000	475000	469000	782000	798000	690000	654000	593000	602000	271000	283000	263000	755000	850000	955000	497000	531000	479000	466000	475000	469000	782000	798000	690000	654000	593000	602000	271000	283000	263000	755000	850000	955000	0.62:0.67:0.60:0.58:0.60:0.59:0.98:1.00:0.86:0.82:0.74:0.75:0.34:0.36:0.33:0.95:1.07:1.20	576000	581000	576000	581000	1.00:1.01
427	17053	tr|L8IG17|L8IG17_9CETA	0.02	25	7	1	Carbamidomethylation	497000	531000	479000	466000	475000	469000	782000	798000	690000	654000	593000	602000	271000	283000	263000	755000	850000	955000	497000	531000	479000	466000	475000	469000	782000	798000	690000	654000	593000	602000	271000	283000	263000	755000	850000	955000	0.62:0.67:0.60:0.58:0.60:0.59:0.98:1.00:0.86:0.82:0.74:0.75:0.34:0.36:0.33:0.95:1.07:1.20	576000	581000	576000	581000	1.00:1.01
443	668	ag|050067|140304CS1900013300001	0.01	5	1	1		43600	38600	45000	46800	45700	44700	61500	64400	72300	55500	59800	58600	58400	52500	53400	34100	53400	36400	43600	38600	45000	46800	45700	44700	61500	64400	72300	55500	59800	58600	58400	52500	53400	34100	53400	36400	0.68:0.60:0.70:0.73:0.71:0.69:0.96:1.00:1.12:0.86:0.93:0.91:0.91:0.82:0.83:0.53:0.83:0.56	51400	51300	51400	51300	1.00:1.00
234	379	ag|027192|NODE_2555256	0.01	35	3	1		40700	38000	55000	78400	79700	83200	88600	103000	94900	54800	68000	73300	101000	96100	83100	64000	60900	61600	40700	38000	55000	78400	79700	83200	88600	103000	94900	54800	68000	73300	101000	96100	83100	64000	60900	61600	0.40:0.37:0.54:0.76:0.78:0.81:0.86:1.00:0.92:0.53:0.66:0.71:0.98:0.94:0.81:0.62:0.59:0.60	73500	73600	73500	73600	1.00:1.00
237	220	ag|051744|140304CS1901047700003	0	6	4	1		64600	59600	62100	73400	76900	77000	100000	103000	111000	27100	0	33300	174000	167000	164000	51400	59800	51500	64600	59600	62100	73400	76900	77000	100000	103000	111000	27100	0	33300	174000	167000	164000	51400	59800	51500	0.63:0.58:0.60:0.71:0.74:0.75:0.97:1.00:1.07:0.26:0:0.32:1.69:1.61:1.59:0.50:0.58:0.50	80900	91000	80900	91000	1.00:1.12
[truncated: 2 more columns]

## Sheet: Table S5
Table S5: Statistical analysis of proteins found in FP vs. DPP.
Protein Group	Protein ID	Accession	Significance	Coverage (%)	#Peptides	#Unique	Biological average of FP	Average of 17 FP	Average of 19 FP	Average of 20 FP	Biological average of DPP	Average of 18 DPP	Average of 19 DPP	Average of 20 DPP	T.test	DPP:FP	Avg. Mass	Description
253	437	ag|173157|Deer_XM_015099418.1	49.86	28	4	4	445778	295333	500667	541333	1.56667e+06	1780000	1510000	1410000	0.00112305	3.51446	25130	PREDICTED: Ovis aries cysteine and glycine rich protein 1 (CSRP1) transcript variant X1 mRNA
130	343	ag|164201|Deer_XM_005206502.3	31.53	36	5	5	524667	463333	450333	660333	1340000	1.55333e+06	1.32333e+06	1.14333e+06	0.00397057	2.554	17421	PREDICTED: Bos taurus myosin light chain 6 (MYL6) transcript variant X1 mRNA
15	75	ag|050292|140304CS1901052300004	74.69	59	16	2	516556	754667	352333	442667	2.66778e+06	1.86333e+06	3200000	2940000	0.0072882	5.16455	44295	Best_annotation=XP_005602432_PREDICTED: actin aortic smooth muscle isoform X2 [Equus caballus]
58	209	ag|045959|140304CS1901017300001	24.81	31	8	8	5.94222e+06	6.19667e+06	6.54333e+06	5.08667e+06	2.84444e+06	2.89333e+06	3620000	2020000	0.00830283	0.478684	40672	Best_annotation=XP_005959611_PREDICTED: decorin isoform X2 [Pantholops hodgsonii]
457	1416	ag|062091|CS60.230410CS600011410001A	1.25	11	1	1	168778	161333	150333	194667	241111	233667	258333	231333	0.0103833	1.42857	13294	Best_annotation=XP_001086691_PREDICTED: peptidyl-prolyl cis-trans isomerase FKBP1A-like [Macaca mulatta]
457	1417	ag|043858|140304CS1901767700001	1.25	9	1	1	168778	161333	150333	194667	241111	233667	258333	231333	0.0103833	1.42857	15055	Best_annotation=XP_001086691_PREDICTED: peptidyl-prolyl cis-trans isomerase FKBP1A-like [Macaca mulatta]
457	1658	ag|168526|Deer_NM_001077969.2	1.25	11	1	1	168778	161333	150333	194667	241111	233667	258333	231333	0.0103833	1.42857	13407	Bos taurus FK506 binding protein 1A 12kDa-like (LOC526524) mRNA
543	693	ag|028723|NODE_2633933	5	2	1	1	10423.9	7305	14166.7	9800	30444.4	36100	32433.3	22800	0.010782	2.92064	57301	Best_annotation=XP_005957095_PREDICTED: alkaline phosphatase tissue-nonspecific isozyme [Pantholops hodgsonii]
11	14	ag|140427|Deer_XM_018040719.1	7.8	42	56	2	229556	212000	224333	252333	478778	583333	468000	385000	0.0132277	2.08567	168290	PREDICTED: Capra hircus collagen type VI alpha 3 chain (COL6A3) transcript variant X4 mRNA
353	873	ag|046611|140304CS1900951600001	6.21	12	1	1	970556	1.06333e+06	1.09033e+06	758000	385222	292000	294667	569000	0.0141475	0.396909	19716	Best_annotation=XP_001501867_PREDICTED: collagen alpha-2(V) chain [Equus caballus]
499	1335	ag|066948|CS60.230410CS600012150004E	2.91	6	2	2	146589	114433	148333	177000	236000	232333	262667	213000	0.0181114	1.60994	36920	Best_annotation=XP_003898533_PREDICTED: WD repeat-containing protein 1 isoform 2 [Papio anubis]
62	80	ag|009628|NODE_162697	4.95	41	11	2	281778	244000	322000	279333	95444.4	23733.3	82266.7	180333	0.0216291	0.338722	38934	Best_annotation=XP_005217493_PREDICTED: fibrinogen beta chain isoform X2 [Bos taurus]
135	381	ag|100392|CS60.230410CS6000025900003	9.64	37	6	6	282111	188667	298667	359000	508111	448000	630000	446333	0.0454674	1.8011	25863	Best_annotation=XP_005962883_PREDICTED: peroxiredoxin-2 [Pantholops hodgsonii]
334	642	ag|148319|Deer_XM_018066211.1	14.57	15	3	3	282222	139667	260333	446667	551778	496333	634667	524333	0.0525004	1.95512	23256	PREDICTED: Capra hircus fibulin 5 (FBLN5) transcript variant X2 mRNA
334	643	ag|078007|CS60.230410CS6000131700057	14.57	14	3	3	282222	139667	260333	446667	551778	496333	634667	524333	0.0525004	1.95512	24206	Best_annotation=XP_005910315_PREDICTED: fibulin-5 isoform X1 [Bos mutus]
204	163	ag|046032|140304CS1901073300001	5.11	15	7	7	617667	493333	632667	727000	420778	373000	417333	472000	0.055638	0.681238	65517	Best_annotation=NP_001039868_peptidyl-prolyl cis-trans isomerase FKBP10 precursor [Bos taurus]
410	17039	tr|E1BF59|E1BF59_BOVIN	2.89	1	2	1	59488.9	27900	56133.3	94433.3	124778	125000	153333	96000	0.0620138	2.0975	527646	Plectin OS=Bos taurus OX=9913 GN=PLEC PE=1 SV=2
141	303	ag|109852|CS60.230410CS600007130000A	8.85	46	7	7	861444	876333	634667	1.07333e+06	1.36889e+06	1180000	1670000	1.25667e+06	0.0625442	1.58906	26783	Best_annotation=XP_005225172_PREDICTED: heat shock protein beta-1 isoform X1 [Bos taurus]
476	994	ag|024460|NODE_2405892	1.21	2	1	1	86872.2	72200	91650	96766.7	63488.9	63633.3	53800	73033.3	0.0661012	0.730831	53250	Best_annotation=XP_005957285_PREDICTED: myocilin [Pantholops hodgsonii]
316	16972	tr|W5P5A0|W5P5A0_SHEEP	20.03	14	22	2	146889	151000	128667	161000	324889	225667	461667	287333	0.0670453	2.2118	279840	Filamin A OS=Ovis aries OX=9940 GN=FLNA PE=4 SV=1
316	16973	tr|L8I022|L8I022_9CETA	20.03	14	22	2	146889	151000	128667	161000	324889	225667	461667	287333	0.0670453	2.2118	280690	Filamin-A OS=Bos mutus OX=72004 GN=M91_05428 PE=4 SV=1
316	16974	tr|F1N169|F1N169_BOVIN	20.03	14	22	2	146889	151000	128667	161000	324889	225667	461667	287333	0.0670453	2.2118	281171	Filamin A OS=Bos taurus OX=9913 GN=FLNA PE=1 SV=2
30	225	ag|180064|Deer_XM_012155064.2	3.31	9	7	1	437222	340000	373667	598000	784778	1015000	627333	712000	0.0717411	1.79492	138899	PREDICTED: Ovis aries musimon collagen type II alpha 1 (COL2A1) transcript variant X2 mRNA
264	187	ag|153234|Deer_XM_018054045.1	11.73	8	4	1	90066.7	79266.7	83266.7	107667	192444	185000	272667	119667	0.0862209	2.13669	73434	PREDICTED: Capra hircus actinin alpha 1 (ACTN1) transcript variant X2 mRNA
264	188	ag|153235|Deer_XM_018054044.1	11.73	8	4	1	90066.7	79266.7	83266.7	107667	192444	185000	272667	119667	0.0862209	2.13669	73782	PREDICTED: Capra hircus actinin alpha 1 (ACTN1) transcript variant X1 mRNA
264	189	ag|153233|Deer_XM_018054046.1	11.73	8	4	1	90066.7	79266.7	83266.7	107667	192444	185000	272667	119667	0.0862209	2.13669	76293	PREDICTED: Capra hircus actinin alpha 1 (ACTN1) transcript variant X3 mRNA
448	665	ag|155025|Deer_XM_018044382.1	15.14	9	2	2	120611	99266.7	100900	161667	48744.4	21366.7	26666.7	98200	0.0892715	0.404146	22899	PREDICTED: Capra hircus serpin family D member 1 (SERPIND1) transcript variant X2 mRNA
101	260	ag|134350|tr|Q1PHW1|Q1PHW1_CEREL	22.83	44	8	8	864556	758667	797333	1.03767e+06	2.33222e+06	1.05333e+06	2.72333e+06	3220000	0.0906108	2.6976	22728	Transgelin (Fragment) OS=Cervus elaphus PE=2 SV=1
101	261	ag|104717|CS60.230410CS6000050900005	22.83	37	8	8	864556	758667	797333	1.03767e+06	2.33222e+06	1.05333e+06	2.72333e+06	3220000	0.0906108	2.6976	26958	Best_annotation=XP_005964492_PREDICTED: transgelin isoform X2 [Pantholops hodgsonii]
409	1008	ag|109205|CS60.230410CS600006940000D	6.32	11	2	2	218256	97100	242333	315333	366889	419667	312333	368667	0.105248	1.68101	41524	Best_annotation=XP_004879885_PREDICTED: fibulin-5 [Heterocephalus glaber]
498	2023	ag|046947|140304CS1900465500001	0.86	8	1	1	3.08778e+06	2810000	3.05667e+06	3.39667e+06	3.94444e+06	4580000	3.23667e+06	4.01667e+06	0.114043	1.27744	21112	Best_annotation=XP_003986048_PREDICTED: collagen alpha-2(XI) chain isoform X2 [Felis catus]
87	251	ag|101606|CS60.230410CS6000033200002	19.57	23	9	4	801444	741667	776667	886000	1.73378e+06	804667	2.17333e+06	2.22333e+06	0.116481	2.16332	36511	Best_annotation=XP_006863142_PREDICTED: tropomyosin beta chain isoform X1 [Chrysochloris asiatica]
256	468	ag|110089|CS60.230410CS6000072200001	14.24	14	3	3	478667	346333	445667	644000	892444	931333	1.20667e+06	539333	0.123321	1.86444	36260	Best_annotation=XP_004008128_PREDICTED: non-muscle caldesmon [Ovis aries]
97	101	ag|167582|Deer_NM_001081575.1	9.31	8	4	2	140094	356333	21383.3	42566.7	421000	233000	551333	478667	0.124623	3.00512	55493	Bos taurus desmin (DES) mRNA
137	283	ag|099711|CS60.230410CS6000021200013	4.32	46	7	3	1.10178e+06	855333	1.29333e+06	1.15667e+06	1490000	1390000	1800000	1280000	0.13032	1.35236	24571	Best_annotation=XP_004004354_PREDICTED: annexin A1 [Ovis aries]
368	17007	tr|A0A212CIE6|A0A212CIE6_CEREH	9.07	34	2	2	402111	233000	402667	570667	717000	784667	910667	455667	0.132476	1.78309	11125	CSTB OS=Cervus elaphus hippelaphus OX=46360 GN=Celaphus_00012846 PE=4 SV=1
654	1856	ag|144213|Deer_XM_018067197.1	1.01	8	1	1	107889	57333.3	127333	139000	166561	191500	177517	130667	0.135465	1.54382	27115	PREDICTED: Capra hircus drebrin like (DBNL) transcript variant X5 mRNA
654	1857	ag|188160|Deer_XM_019984648.1	1.01	6	1	1	107889	57333.3	127333	139000	166561	191500	177517	130667	0.135465	1.54382	36845	PREDICTED: Bos indicus drebrin like (DBNL) transcript variant X1 mRNA
654	1924	ag|047486|140304CS1900740600001	1.01	6	1	1	107889	57333.3	127333	139000	166561	191500	177517	130667	0.135465	1.54382	38065	Best_annotation=XP_005222414_PREDICTED: drebrin-like isoform X3 [Bos taurus]
654	1925	ag|188159|Deer_XM_019984650.1	1.01	5	1	1	107889	57333.3	127333	139000	166561	191500	177517	130667	0.135465	1.54382	43970	PREDICTED: Bos indicus drebrin like (DBNL) transcript variant X3 mRNA
232	164	ag|147692|Deer_XM_018059793.1	6.42	13	5	5	304111	185333	276667	450333	461556	415000	538333	431333	0.143939	1.51772	83033	PREDICTED: Capra hircus fibronectin 1 (FN1) transcript variant X4 mRNA
17	22	ag|021555|NODE_2344671	5.34	31	39	14	1.44889e+06	1170000	1.41333e+06	1.76333e+06	1.06544e+06	836333	1.26667e+06	1.09333e+06	0.145902	0.735353	190679	Best_annotation=XP_005215775_PREDICTED: collagen alpha-1(XIV) chain isoform X3 [Bos taurus]
438	1106	ag|069953|CS60.230410CS600012460004F	6.95	13	1	1	84405.6	83800	67266.7	102150	149244	80400	196000	171333	0.150877	1.76818	22299	Best_annotation=XP_005670120_PREDICTED: lipoma-preferred partner [Sus scrofa]
438	1107	ag|041506|NODE_944392	6.95	10	1	1	84405.6	83800	67266.7	102150	149244	80400	196000	171333	0.150877	1.76818	29486	Best_annotation=XP_005675192_PREDICTED: lipoma-preferred partner isoform X3 [Capra hircus]
51	54	ag|042538|NODE_966432	30.19	50	14	14	3850000	1510000	4600000	5440000	1.46444e+06	280000	2.45667e+06	1.65667e+06	0.152752	0.380375	36257	Best_annotation=XP_005891946_PREDICTED: prolargin [Bos mutus]
51	55	ag|178894|Deer_XM_012168756.2	30.19	35	14	14	3850000	1510000	4600000	5440000	1.46444e+06	280000	2.45667e+06	1.65667e+06	0.152752	0.380375	51224	PREDICTED: Ovis aries musimon proline/arginine-rich end leucine-rich repeat protein (PRELP) transcript variant X2 mRNA
364	901	ag|168646|Deer_NM_001285550.1	9.78	24	2	2	211222	134000	300000	199667	116744	69900	143000	137333	0.153184	0.552709	13218	Capra hircus superoxide dismutase 1 (SOD1) mRNA
364	902	ag|133912|tr|V5LTF3|V5LTF3_CERNI	9.78	21	2	2	211222	134000	300000	199667	116744	69900	143000	137333	0.153184	0.552709	15585	Superoxide dismutase [Cu-Zn] (Fragment) OS=Cervus nippon PE=2 SV=1
364	903	ag|050879|140304CS1901053900001	9.78	19	2	2	211222	134000	300000	199667	116744	69900	143000	137333	0.153184	0.552709	16904	Best_annotation=NP_777040_superoxide dismutase [Cu-Zn] [Bos taurus]
364	904	ag|108166|CS60.230410CS6000006500002	9.78	18	2	2	211222	134000	300000	199667	116744	69900	143000	137333	0.153184	0.552709	18200	Best_annotation=NP_777040_superoxide dismutase [Cu-Zn] [Bos taurus]
669	2145	ag|142910|Deer_XM_018038568.1	11.66	2	1	1	322667	441000	527000	0	820000	1.18667e+06	389000	884333	0.154894	2.54132	88005	PREDICTED: Capra hircus bromodomain containing 2 (BRD2) transcript variant X5 mRNA
669	2146	ag|170938|Deer_XM_012100471.2	11.66	2	1	1	322667	441000	527000	0	820000	1.18667e+06	389000	884333	0.154894	2.54132	93379	PREDICTED: Ovis aries bromodomain containing 2 (BRD2) transcript variant X2 mRNA
4	10	ag|101170|CS60.230410CS6000030500001	22.29	54	53	2	3420000	3250000	3100000	3910000	1.39356e+07	2.46333e+07	3.60667e+06	1.35667e+07	0.158652	4.07472	69394	Best_annotation=NP_851335_serum albumin precursor [Bos taurus]
5	8	ag|141628|Deer_XM_005678936.3	9.01	53	46	1	1.10722e+07	9.91667e+06	1.07667e+07	1.25333e+07	1.54444e+07	1.99333e+07	1.15333e+07	1.48667e+07	0.162935	1.39488	128665	PREDICTED: Capra hircus collagen type I alpha 2 chain (COL1A2) mRNA
406	224	ag|011950|NODE_1768711	11.49	2	1	1	118778	180000	0	176333	17483.3	19100	33350	0	0.16762	0.147194	81873	Best_annotation=XP_005212690_PREDICTED: spectrin beta chain brain 1 isoform X3 [Bos taurus]
607	1585	ag|003384|NODE_1224558	7.49	13	1	1	26973.3	9380	22410	49130	6057.78	1620	14903.3	1650	0.169795	0.224584	14385	Best_annotation=XP_005088054_PREDICTED: coatomer subunit gamma-1-like [Mesocricetus auratus]
607	1587	ag|144372|Deer_XM_018066902.1	7.49	8	1	1	26973.3	9380	22410	49130	6057.78	1620	14903.3	1650	0.169795	0.224584	23183	PREDICTED: Capra hircus coatomer protein complex subunit gamma 1 (COPG1) mRNA
607	1588	ag|141971|Deer_XM_018046921.1	7.49	6	1	1	26973.3	9380	22410	49130	6057.78	1620	14903.3	1650	0.169795	0.224584	32924	PREDICTED: Capra hircus coatomer protein complex subunit gamma 2 (COPG2) mRNA
607	1589	ag|041940|NODE_954021	7.49	3	1	1	26973.3	9380	22410	49130	6057.78	1620	14903.3	1650	0.169795	0.224584	58700	Best_annotation=XP_005679647_PREDICTED: coatomer subunit gamma-2 [Capra hircus]
122	40	ag|021572|NODE_2345349	5.6	10	4	1	67455.6	55600	56766.7	90000	229689	206667	408333	74066.7	0.172595	3.40504	77076	Best_annotation=XP_005902873_PREDICTED: LOW QUALITY PROTEIN: collagen alpha-1(XII) chain [Bos mutus]
467	1020	ag|106215|CS60.230410CS600005770001D	4.66	17	2	2	85500	34633.3	80733.3	141133	149000	105000	190000	152000	0.182641	1.74269	31200	Best_annotation=XP_004377160_PREDICTED: chloride intracellular channel protein 4 [Trichechus manatus latirostris]
380	730	ag|053558|140304CS1901922600001	13.77	16	2	2	427556	413667	249000	620000	208789	89033.3	369333	168000	0.182856	0.488332	18320	Best_annotation=NP_001029937_thy-1 membrane glycoprotein precursor [Bos taurus]
627	2022	ag|190086|Deer_XM_019972403.1	4.66	2	1	1	40196.7	1050	9040	110500	123200	78133.3	199000	92466.7	0.18506	3.06493	76715	PREDICTED: Bos indicus transglutaminase 2 (TGM2) mRNA
489	953	ag|099903|CS60.230410CS6000022700013	2.01	3	1	1	41594.4	28450	50733.3	45600	64400	68200	84533.3	40466.7	0.191353	1.54828	46346	Best_annotation=XP_860499_PREDICTED: eukaryotic initiation factor 4A-II isoform 7 [Canis lupus familiaris]
489	1205	ag|128413|CS60.230410CS60000513FFFFB	2.01	5	1	1	41594.4	28450	50733.3	45600	64400	68200	84533.3	40466.7	0.191353	1.54828	27655	Best_annotation=XP_004312484_PREDICTED: eukaryotic initiation factor 4A-I isoform 1 [Tursiops truncatus]
489	955	ag|104796|CS60.230410CS600005130000C	2.01	3	1	1	41594.4	28450	50733.3	45600	64400	68200	84533.3	40466.7	0.191353	1.54828	46684	Best_annotation=XP_006151852_PREDICTED: eukaryotic initiation factor 4A-I [Tupaia chinensis]
400	787	ag|149595|Deer_XM_018060496.1	5.18	6	2	2	142922	127267	107167	194333	88866.7	44800	104900	116900	0.192468	0.621783	37377	PREDICTED: Capra hircus G protein subunit beta 1 (GNB1) transcript variant X3 mRNA
118	146	ag|109404|CS60.230410CS600000070000C	7.67	22	7	5	660556	363667	868333	749667	421556	389333	455000	420333	0.194512	0.638183	52174	Best_annotation=XP_004434451_PREDICTED: uncharacterized protein LOC101395346 [Ceratotherium simum simum]
121	229	ag|100564|CS60.230410CS6000027100001	5.29	36	8	6	534444	455333	457667	690333	713222	701667	867333	570667	0.197956	1.33451	31632	Best_annotation=XP_002914041_PREDICTED: 14-3-3 protein zeta/delta-like [Ailuropoda melanoleuca]
462	1542	ag|044335|140304CS1901019400001	1.59	13	1	1	118278	83033.3	97466.7	174333	184667	210667	223333	120000	0.198721	1.5613	14009	Best_annotation=XP_004016439_PREDICTED: CD59 glycoprotein [Ovis aries]
131	281	ag|050466|140304CS1901043600001	4.07	16	8	8	1.10956e+06	935333	1.12667e+06	1.26667e+06	1.42222e+06	1390000	1750000	1.12667e+06	0.201184	1.28179	71539	Best_annotation=NP_445940_collagen type V alpha 2 precursor [Rattus norvegicus]
565	17063	tr|A0A212CA18|A0A212CA18_CEREH	2.25	36	5	1	369889	280333	384333	445000	204633	14566.7	260667	338667	0.203604	0.553229	22010	CLEC3B OS=Cervus elaphus hippelaphus OX=46360 GN=Celaphus_00010625 PE=4 SV=1
565	17064	sp|Q2KIS7|TETN_BOVIN	2.25	25	4	1	369889	280333	384333	445000	204633	14566.7	260667	338667	0.203604	0.553229	22144	Tetranectin OS=Bos taurus OX=9913 GN=CLEC3B PE=2 SV=1
565	17065	tr|L8IKS7|L8IKS7_9CETA	2.25	25	4	1	369889	280333	384333	445000	204633	14566.7	260667	338667	0.203604	0.553229	22158	Tetranectin OS=Bos mutus OX=72004 GN=M91_08233 PE=4 SV=1
565	17066	tr|W5PN97|W5PN97_SHEEP	2.25	25	4	1	369889	280333	384333	445000	204633	14566.7	260667	338667	0.203604	0.553229	22268	C-type lectin domain family 3 member B OS=Ovis aries OX=9940 GN=CLEC3B PE=4 SV=1
333	306	ag|107077|CS60.230410CS600006110000D	3.05	22	5	5	221444	233667	221667	209000	276000	274333	338000	215667	0.204599	1.24636	37179	Best_annotation=XP_005225065_PREDICTED: malate dehydrogenase mitochondrial isoform X1 [Bos taurus]
274	515	ag|006978|NODE_1460532	10.79	18	3	3	371667	291000	308667	515333	628667	631667	350000	904333	0.216912	1.69148	20618	Best_annotation=XP_004004031_PREDICTED: alpha-1-acid glycoprotein-like [Ovis aries]
274	516	ag|067666|CS60.230410CS6000122300035	10.79	14	3	3	371667	291000	308667	515333	628667	631667	350000	904333	0.216912	1.69148	25414	Best_annotation=NP_001035592_alpha-1-acid glycoprotein precursor [Bos taurus]
164	298	ag|100108|CS60.230410CS6000002400034	9.24	50	7	3	284556	179667	341333	332667	494111	313667	757000	411667	0.220194	1.73643	19935	Best_annotation=XP_005974125_PREDICTED: myosin regulatory light chain 12B isoform X1 [Pantholops hodgsonii]
164	299	ag|100107|CS60.230410CS6000002400033	9.24	38	7	3	284556	179667	341333	332667	494111	313667	757000	411667	0.220194	1.73643	25994	Best_annotation=XP_848839_PREDICTED: myosin regulatory light polypeptide 9-like isoformX1 [Canis lupus familiaris]
579	1222	ag|003365|NODE_1223868	23.04	14	1	1	28333.3	0	35400	49600	53677.8	71466.7	50800	38766.7	0.222614	1.89451	18278	Best_annotation=XP_005899416_PREDICTED: ubiquitin-like modifier-activating enzyme 1 isoform X2 [Bos mutus]
611	17016	tr|F1MVK1|F1MVK1_BOVIN	1.83	2	2	1	67677.8	60333.3	60533.3	82166.7	88955.6	115167	78000	73700	0.229697	1.3144	173973	Uncharacterized protein OS=Bos taurus OX=9913 PE=4 SV=2
611	17017	tr|E1BH06|E1BH06_BOVIN	1.83	2	2	1	67677.8	60333.3	60533.3	82166.7	88955.6	115167	78000	73700	0.229697	1.3144	192764	Uncharacterized protein OS=Bos taurus OX=9913 GN=LOC107131209 PE=1 SV=2
227	16962	tr|L8J4S1|L8J4S1_9CETA	6.07	15	20	1	57911.1	36533.3	43666.7	93533.3	101189	98433.3	145667	59466.7	0.231449	1.74731	224810	Myosin-9 (Fragment) OS=Bos mutus OX=72004 GN=M91_10500 PE=3 SV=1
162	545	ag|106545|CS60.230410CS6000058800016	8.21	30	6	6	1.47089e+06	949333	1.43333e+06	2030000	2.32778e+06	2.68333e+06	1.28667e+06	3.01333e+06	0.235701	1.58257	17590	Best_annotation=XP_005901105_PREDICTED: transthyretin [Bos mutus]
28	46	ag|051876|140304CS1901057300001	2.3	32	16	1	63033.3	51900	70233.3	66966.7	107989	69666.7	171000	83300	0.235757	1.7132	76443	Best_annotation=XP_005983497_PREDICTED: collagen alpha-1(VI) chain [Pantholops hodgsonii]
109	72	ag|052799|140304CS1901141300001	3.76	32	12	12	507333	408333	495667	618000	654222	576667	830333	555667	0.242417	1.28953	56473	Best_annotation=NP_786990_ATP synthase subunit beta mitochondrial precursor [Bos taurus]
109	73	ag|138943|Deer_XM_005680331.2	3.76	30	12	12	507333	408333	495667	618000	654222	576667	830333	555667	0.242417	1.28953	59456	PREDICTED: Capra hircus ATP synthase H+ transporting mitochondrial F1 complex beta polypeptide (ATP5B) mRNA
580	1276	ag|047476|140304CS1901011600001	5.17	5	1	1	112867	92800	96466.7	149333	59411.1	0	121233	57000	0.247329	0.526383	33816	Best_annotation=NP_001120753_CD81 antigen [Ovis aries]
580	1277	ag|109122|CS60.230410CS600006910001F	5.17	5	1	1	112867	92800	96466.7	149333	59411.1	0	121233	57000	0.247329	0.526383	34883	Best_annotation=NP_001120753_CD81 antigen [Ovis aries]
247	231	ag|035287|NODE_629325	18.32	17	4	4	514667	204667	513667	825667	247778	175000	418000	150333	0.250109	0.481434	34505	Best_annotation=XP_005213929_PREDICTED: BTB/POZ domain-containing protein KCTD12 [Bos taurus]
538	1179	ag|105625|CS60.230410CS6000055400001	0.99	2	1	1	113422	112000	108600	119667	151711	125667	209667	119800	0.260127	1.33758	59752	Best_annotation=NP_001069538_succinyl-CoA:3-ketoacid-coenzyme A transferase 1 mitochondrial [Bos taurus]
76	126	ag|038536|NODE_756522	11.78	44	11	10	2200000	2010000	2.17667e+06	2.41333e+06	1.37756e+06	149333	1.78667e+06	2.19667e+06	0.265757	0.626162	30235	Best_annotation=NP_776667_apolipoprotein A-I preproprotein [Bos taurus]
182	335	ag|001905|NODE_1117864	1.37	24	4	1	642778	480667	664000	783667	437889	316000	289333	708333	0.273565	0.681245	22552	Best_annotation=XP_005901447_PREDICTED: fibrinogen gamma-B chain-like isoform X2 [Bos mutus]
84	99	ag|050838|140304CS1901508400001	1.04	34	12	12	971778	1.05667e+06	892333	966333	901778	890000	955667	859667	0.274446	0.927967	47572	Best_annotation=XP_005693374_PREDICTED: pigment epithelium-derived factor [Capra hircus]
346	920	ag|145278|Deer_XM_018064747.1	2.78	14	2	2	134000	117333	144333	140333	74513.3	9440	164000	50100	0.27447	0.55607	30004	PREDICTED: Capra hircus microfibrillar associated protein 4 (MFAP4) mRNA
280	400	ag|109549|CS60.230410CS600007020001E	5.39	18	3	3	274222	283000	181333	358333	190122	109700	255333	205333	0.276181	0.693314	36115	Best_annotation=XP_003934095_PREDICTED: SPARC [Saimiri boliviensis boliviensis]
57	122	ag|100111|CS60.230410CS6000024000001	9.06	44	10	2	2.82667e+06	2.69333e+06	2.41333e+06	3.37333e+06	4.11111e+06	5610000	2.25667e+06	4.46667e+06	0.278279	1.4544	26246	Best_annotation=XP_005675608_PREDICTED: serotransferrin [Capra hircus]
386	1055	ag|006636|NODE_1413316	1.92	16	2	1	571556	366000	659667	689000	951333	786333	1510000	557667	0.281019	1.66446	26721	Best_annotation=XP_005971586_PREDICTED: asporin [Pantholops hodgsonii]
386	1056	ag|108674|CS60.230410CS6000066900006	1.92	16	2	1	571556	366000	659667	689000	951333	786333	1510000	557667	0.281019	1.66446	26731	Best_annotation=XP_005971586_PREDICTED: asporin [Pantholops hodgsonii]
614	17133	tr|G5E619|G5E619_BOVIN	1.38	6	1	1	82255.6	93033.3	80600	73133.3	55344.4	29833.3	96833.3	39366.7	0.283006	0.672835	24306	GTP-binding nuclear protein Ran OS=Bos taurus OX=9913 PE=3 SV=1
552	1333	ag|112445|CS60.230410CS6000080500011	0.06	5	1	1	33925.6	15866.7	45910	40000	55861.7	66900	75300	25385	0.288981	1.6466	33941	Best_annotation=XP_005891202_PREDICTED: factor XIIa inhibitor-like [Bos mutus]
500	540	ag|135358|Deer_XM_018055244.1	7.69	5	1	1	85766.7	54800	68833.3	133667	53922.2	72933.3	45500	43333.3	0.289305	0.628708	49006	PREDICTED: Capra hircus spectrin beta non-erythrocytic 1 (SPTBN1) transcript variant X4 mRNA
388	613	ag|051833|140304CS1901296900001	10.73	14	3	3	161844	70200	224667	190667	299022	394667	408000	94400	0.290055	1.84759	49228	Best_annotation=NP_776425_calreticulin precursor [Bos taurus]
262	504	ag|049619|140304CS1900100900001	11.98	24	3	3	345556	415333	226333	395000	714000	468667	363333	1310000	0.294228	2.06624	15052	Best_annotation=XP_005897322_PREDICTED: fatty acid-binding protein adipocyte [Bos mutus]
147	97	ag|048474|140304CS1901904500002	1.88	24	7	7	751778	748000	634000	873333	660889	619667	637667	725333	0.300161	0.879101	49440	Best_annotation=XP_004021061_PREDICTED: procollagen C-endopeptidase enhancer 1 [Ovis aries]
484	1297	ag|033852|NODE_592532	3.99	5	1	1	209697	164250	193340	271500	93000	0	279000	0	0.301102	0.443498	32533	Best_annotation=XP_006749495_PREDICTED: collagen alpha-1(IV) chain-like [Leptonychotes weddellii]
361	591	ag|049276|140304CS1900108500001	5.95	10	3	3	243556	149000	219667	362000	346667	414333	400000	225667	0.302423	1.42336	74769	Best_annotation=XP_005896425_PREDICTED: fibulin-1 [Bos mutus]
236	89	ag|035654|NODE_637476	3.2	9	5	1	108844	89333.3	97200	140000	85677.8	77500	70533.3	109000	0.304687	0.787158	83113	Best_annotation=NP_001103265_alpha-2-macroglobulin precursor [Bos taurus]
588	1490	ag|160900|Deer_XM_005226252.3	0.99	4	1	1	24973.3	9620	30933.3	34366.7	35822.2	33000	45900	28566.7	0.309296	1.43442	42943	PREDICTED: Bos taurus heterogeneous nuclear ribonucleoprotein F (HNRNPF) transcript variant X12 mRNA
588	1758	ag|156051|Deer_XM_010800486.2	0.99	7	1	1	24973.3	9620	30933.3	34366.7	35822.2	33000	45900	28566.7	0.309296	1.43442	28475	PREDICTED: Bos taurus heterogeneous nuclear ribonucleoprotein F-like (LOC540405) mRNA
588	1759	ag|100287|CS60.230410CS6000025000004	0.99	6	1	1	24973.3	9620	30933.3	34366.7	35822.2	33000	45900	28566.7	0.309296	1.43442	31534	Best_annotation=XP_005976434_PREDICTED: heterogeneous nuclear ribonucleoprotein F isoform X6 [Pantholops hodgsonii]
620	1396	ag|171098|Deer_XM_015102450.1	0.72	3	1	1	42111.1	44233.3	34833.3	47266.7	56838.9	49733.3	80433.3	40350	0.309682	1.34974	55965	PREDICTED: Ovis aries microtubule associated protein 4 (MAP4) transcript variant X18 mRNA
620	1501	ag|035066|NODE_624464	0.72	5	1	1	42111.1	44233.3	34833.3	47266.7	56838.9	49733.3	80433.3	40350	0.309682	1.34974	30029	Best_annotation=XP_005955227_PREDICTED: microtubule-associated protein 4 [Pantholops hodgsonii]
54	373	ag|133402|tr|Q4TU70|Q4TU70_CEREL	8.85	58	7	1	1.20667e+06	2560000	0	1060000	6.20644e+06	1.45333e+07	679333	3.40667e+06	0.309754	5.14346	15243	Alpha hemoglobin chain OS=Cervus elaphus canadensis PE=3 SV=1
255	253	ag|110658|CS60.230410CS6000074100002	10.04	15	3	3	380444	276333	391333	473667	226511	60200	458667	160667	0.310333	0.595386	27190	Best_annotation=NP_803482_glutathione S-transferase P [Bos taurus]
306	321	ag|043792|140304CS1901230800001	3.44	9	4	4	334333	350333	302667	350000	415667	386667	546000	314333	0.31131	1.24327	60047	Best_annotation=XP_005892407_PREDICTED: ATP synthase subunit alpha mitochondrial isoform X1 [Bos mutus]
582	2139	ag|177842|Deer_XM_015092209.1	8.1	1	1	1	1083000	916667	985667	1.34667e+06	2.04667e+06	1.31333e+06	3.70333e+06	1.12333e+06	0.315639	1.88981	159464	PREDICTED: Ovis aries B-cell CLL/lymphoma 9 (BCL9) transcript variant X1 mRNA
582	2140	ag|179766|Deer_XM_012158408.2	8.1	1	1	1	1083000	916667	985667	1.34667e+06	2.04667e+06	1.31333e+06	3.70333e+06	1.12333e+06	0.315639	1.88981	152140	PREDICTED: Ovis aries musimon B-cell CLL/lymphoma 9 (BCL9) transcript variant X9 mRNA
693	1822	ag|018832|NODE_2157902	0.69	6	1	1	98811.1	99500	71266.7	125667	121889	147333	112333	106000	0.319008	1.23355	27139	Best_annotation=NP_872593_glutamate dehydrogenase 1 mitochondrial precursor [Bos taurus]
693	1823	ag|166834|Deer_NM_182652.2	0.69	6	1	1	98811.1	99500	71266.7	125667	121889	147333	112333	106000	0.319008	1.23355	27982	Bos taurus glutamate dehydrogenase 1 (GLUD1) mRNA
693	1824	ag|112634|CS60.230410CS600008100001C	0.69	5	1	1	98811.1	99500	71266.7	125667	121889	147333	112333	106000	0.319008	1.23355	35507	Best_annotation=NP_001265496_glutamate dehydrogenase 1 [Ovis aries]
32	50	ag|165662|Deer_XM_005203621.1	5.69	35	20	7	1.58889e+06	1290000	1480000	1.99667e+06	2.14022e+06	2.14333e+06	2.91333e+06	1364000	0.327421	1.34699	68264	PREDICTED: Bos taurus lamin A/C (LMNA) transcript variant X2 mRNA
6	1	ag|050157|140304CS1900100400003	0.99	66	43	4	1.68556e+07	1.53333e+07	18300000	1.69333e+07	1.40433e+07	9530000	1.47667e+07	1.78333e+07	0.335521	0.833158	95953	Best_annotation=XP_005909757_PREDICTED: collagen alpha-2(I) chain [Bos mutus]
14	12	ag|045840|140304CS1901088200001	3.97	34	24	13	8.61667e+06	7.26333e+06	6.75333e+06	1.18333e+07	1.05267e+07	1.08667e+07	9.21333e+06	11500000	0.337152	1.22166	98363	Best_annotation=XP_006210056_PREDICTED: collagen alpha-1(III) chain-like [Vicugna pacos]
12	31	ag|050760|140304CS1900110600001	4.42	54	30	28	1.29889e+07	11000000	1.09667e+07	17000000	1.60778e+07	1.27667e+07	1.97333e+07	1.57333e+07	0.338721	1.23781	58549	Best_annotation=XP_005982993_PREDICTED: vimentin [Pantholops hodgsonii]
379	1285	ag|177836|Deer_XM_012180232.2	6.3	15	2	2	242444	314000	168667	244667	416444	175333	712000	362000	0.345367	1.71769	10774	PREDICTED: Ovis aries histone H3 (LOC101120877) transcript variant X1 mRNA
379	1286	ag|000862|NODE_1048051	6.3	11	2	2	242444	314000	168667	244667	416444	175333	712000	362000	0.345367	1.71769	14043	Best_annotation=XP_854287_PREDICTED: histone H3.1-like [Canis lupus familiaris]
379	1287	ag|179191|Deer_XM_015090321.1	6.3	10	2	2	242444	314000	168667	244667	416444	175333	712000	362000	0.345367	1.71769	15775	PREDICTED: Ovis aries musimon histone H3.1 (LOC106990518) mRNA
379	1288	ag|142951|Deer_XM_005696755.2	6.3	10	2	2	242444	314000	168667	244667	416444	175333	712000	362000	0.345367	1.71769	16446	PREDICTED: Capra hircus histone H3.1 (LOC102185882) mRNA
379	1289	ag|102476|CS60.230410CS6000003900003	6.3	9	2	2	242444	314000	168667	244667	416444	175333	712000	362000	0.345367	1.71769	17864	Best_annotation=XP_003750396_PREDICTED: histone H3.3-like [Rattus norvegicus]
379	1291	ag|135936|Deer_XM_005682056.3	6.3	6	2	2	242444	314000	168667	244667	416444	175333	712000	362000	0.345367	1.71769	25794	PREDICTED: Capra hircus histone H3.1 (LOC102178257) mRNA
254	464	ag|041856|NODE_952258	8.66	36	3	3	439111	287000	440667	589667	711333	308333	1.13667e+06	689000	0.345586	1.61994	19275	Best_annotation=XP_005205817_PREDICTED: non-muscle caldesmon isoform X9 [Bos taurus]
231	143	ag|019285|NODE_2205221	5.97	16	5	5	270222	253333	259333	298000	418889	384667	675333	196667	0.347944	1.55016	48831	Best_annotation=XP_002687704_PREDICTED: cytoskeleton-associated protein 4 isoform 1 [Bos taurus]
231	144	ag|053963|140304CS1901050100001	5.97	15	5	5	270222	253333	259333	298000	418889	384667	675333	196667	0.347944	1.55016	50744	Best_annotation=XP_002687704_PREDICTED: cytoskeleton-associated protein 4 isoform 1 [Bos taurus]
405	844	ag|006887|NODE_1444018	0.93	15	1	1	215111	138333	201000	306000	282667	349000	208667	290333	0.348198	1.31405	17274	Best_annotation=XP_005955585_PREDICTED: beta-2-glycoprotein 1 [Pantholops hodgsonii]
524	17058	tr|A0A212C005|A0A212C005_CEREH	0.43	21	3	1	124456	100367	119000	154000	142222	142000	152333	132333	0.348577	1.14276	22104	FHL1 (Fragment) OS=Cervus elaphus hippelaphus OX=46360 GN=Celaphus_00009554 PE=4 SV=1
327	1627	ag|134388|tr|A6YLN4|A6YLN4_CEREL	21.46	23	2	2	142689	18700	69033.3	340333	992278	2580000	47166.7	349667	0.350706	6.95413	6914	Thymosin beta 4 X chromosome (Fragment) OS=Cervus elaphus GN=TMSB4X PE=2 SV=1
529	413	ag|137418|Deer_XM_018052143.1	6.05	2	1	1	15805.6	2850	21500	23066.7	30277.8	11466.7	52833.3	26533.3	0.35104	1.91564	164438	PREDICTED: Capra hircus talin 1 (TLN1) transcript variant X2 mRNA
529	414	ag|137420|Deer_XM_018052141.1	6.05	2	1	1	15805.6	2850	21500	23066.7	30277.8	11466.7	52833.3	26533.3	0.35104	1.91564	165972	PREDICTED: Capra hircus talin 1 (TLN1) transcript variant X1 mRNA
49	34	ag|101511|CS60.230410CS6000032900007	4.14	51	19	3	597778	381333	535333	876667	431222	417000	541667	335000	0.351851	0.721375	52264	Best_annotation=XP_003794978_PREDICTED: sodium-dependent phosphate transport protein 2C [Otolemur garnettii]
23	151	ag|053110|140304CS1901253300001	4.65	42	12	12	1.30433e+07	8.29667e+06	1.27333e+07	18100000	1.61556e+07	1.78333e+07	1.49333e+07	15700000	0.35297	1.23861	39603	Best_annotation=XP_004006300_PREDICTED: lumican [Ovis aries]
174	367	ag|053965|140304CS1901051900001	4.42	38	7	7	1.36456e+06	907000	1310000	1.87667e+06	1.66556e+06	1.78333e+06	1.62667e+06	1.58667e+06	0.354324	1.22058	25974	Best_annotation=XP_003999210_PREDICTED: dermatopontin [Felis catus]
151	249	ag|104297|CS60.230410CS6000048800001	7.87	28	8	6	850111	523333	1032000	995000	1.28078e+06	1060000	2.01667e+06	765667	0.354468	1.5066	27731	Best_annotation=XP_005971586_PREDICTED: asporin [Pantholops hodgsonii]
269	1352	ag|048617|140304CS1901083100001	3.14	13	2	2	1.86111e+06	1.38667e+06	1.80333e+06	2.39333e+06	1.39378e+06	704667	1.69333e+06	1.78333e+06	0.359973	0.748896	14707	Best_annotation=XP_003282255_PREDICTED: protein S100-A10-like isoform 2 [Nomascus leucogenys]
269	1400	ag|127483|CS60.230410CS60000435FFFFA	3.14	17	2	2	1.86111e+06	1.38667e+06	1.80333e+06	2.39333e+06	1.39378e+06	704667	1.69333e+06	1.78333e+06	0.359973	0.748896	11328	Best_annotation=XP_005541899_PREDICTED: protein S100-A10 isoform X1 [Macaca fascicularis]
269	1401	ag|103257|CS60.230410CS600004350000A	3.14	14	2	2	1.86111e+06	1.38667e+06	1.80333e+06	2.39333e+06	1.39378e+06	704667	1.69333e+06	1.78333e+06	0.359973	0.748896	13535	Best_annotation=XP_003282255_PREDICTED: protein S100-A10-like isoform 2 [Nomascus leucogenys]
219	246	ag|188346|Deer_XM_019983198.1	9.02	12	6	6	414889	285667	415333	543667	633667	351333	1.02667e+06	523000	0.368227	1.52732	77143	PREDICTED: Bos indicus aggrecan (ACAN) mRNA
219	247	ag|181741|Deer_XM_015106930.1	9.02	12	6	6	414889	285667	415333	543667	633667	351333	1.02667e+06	523000	0.368227	1.52732	77568	PREDICTED: Ovis aries musimon aggrecan (ACAN) transcript variant X2 mRNA
219	248	ag|031960|NODE_438268	9.02	11	6	6	414889	285667	415333	543667	633667	351333	1.02667e+06	523000	0.368227	1.52732	86562	Best_annotation=XP_005977248_PREDICTED: aggrecan core protein [Pantholops hodgsonii]
27	30	ag|156274|Deer_XM_015470037.1	1.62	28	27	2	113344	81266.7	124433	134333	70787.4	629	136000	75733.3	0.372419	0.624534	128473	PREDICTED: Bos taurus AHNAK nucleoprotein (AHNAK) transcript variant X4 mRNA
148	169	ag|165138|Deer_XM_005224876.2	2.93	28	7	6	387111	243000	461667	456667	473778	393667	561333	466333	0.375027	1.22388	47960	PREDICTED: Bos taurus aldolase fructose-bisphosphate A (ALDOA) transcript variant X1 mRNA
148	171	ag|184593|Deer_XM_012124751.1	2.93	31	7	6	387111	243000	461667	456667	473778	393667	561333	466333	0.375027	1.22388	42496	PREDICTED: Ovis aries musimon aldolase fructose-bisphosphate A (ALDOA) transcript variant X5 mRNA
148	172	ag|047570|140304CS1901364400001	2.93	30	7	6	387111	243000	461667	456667	473778	393667	561333	466333	0.375027	1.22388	44840	Best_annotation=XP_005963206_PREDICTED: fructose-bisphosphate aldolase A isoform X3 [Pantholops hodgsonii]
548	1522	ag|167148|Deer_NM_001034249.2	0.92	28	1	1	52111.1	42733.3	50733.3	62866.7	68566.7	93933.3	71400	40366.7	0.37751	1.31578	8208	Bos taurus alcohol dehydrogenase 5 (class III) chi polypeptide (ADH5) mRNA
548	1524	ag|103140|CS60.230410CS6000042900007	0.92	8	1	1	52111.1	42733.3	50733.3	62866.7	68566.7	93933.3	71400	40366.7	0.37751	1.31578	30236	Best_annotation=NP_001231762_alcohol dehydrogenase 5 (class III) chi polypeptide [Sus scrofa]
169	688	ag|007033|NODE_1465825	3.43	13	3	3	1.54556e+06	1.46333e+06	1.40333e+06	1770000	1.90444e+06	1.62333e+06	2.59333e+06	1.49667e+06	0.380581	1.23221	36208	Best_annotation=XP_006739678_PREDICTED: collagen alpha-1(V) chain-like [Leptonychotes weddellii]
471	556	ag|137419|Deer_XM_018052143.1	6.26	3	2	2	22896.7	10740	23816.7	34133.3	36536.7	17333.3	59166.7	33110	0.38353	1.59572	105176	PREDICTED: Capra hircus talin 1 (TLN1) transcript variant X2 mRNA
447	1301	ag|179797|Deer_XM_012158078.2	1.78	22	2	2	435444	436667	433667	436000	345811	166267	393333	477833	0.389872	0.794157	24417	PREDICTED: Ovis aries musimon collagen type IV alpha 3 (Goodpasture antigen) (COL4A3) transcript variant X4 mRNA
391	16984	tr|A0A212CSV5|A0A212CSV5_CEREH	0.64	29	8	1	171111	205000	169667	138667	141300	178333	95233.3	150333	0.391144	0.825779	29350	SERPINA3-5 (Fragment) OS=Cervus elaphus hippelaphus OX=46360 GN=Celaphus_00015510 PE=3 SV=1
643	1281	ag|029099|NODE_26936	0.31	2	1	1	12380	15300	8240	13600	6177.78	0	0	18533.3	0.396245	0.499013	79306	Best_annotation=XP_002697934_PREDICTED: periplakin isoform X1 [Bos taurus]
389	660	ag|185551|Deer_NM_001161865.1	2.24	7	2	2	90577.8	85300	75766.7	110667	71388.9	58100	106067	50000	0.399332	0.78815	50432	Ovis aries GDP dissociation inhibitor 2 (GDI2) mRNA
389	661	ag|054458|140304CS1901105100004	2.24	7	2	2	90577.8	85300	75766.7	110667	71388.9	58100	106067	50000	0.399332	0.78815	51471	Best_annotation=NP_001155337_rab GDP dissociation inhibitor beta [Ovis aries]
397	641	ag|048252|140304CS1901280900001	3.79	16	3	3	339778	314667	264333	440333	261444	144667	371667	268000	0.403478	0.769457	28228	Best_annotation=XP_003280127_PREDICTED: calpain small subunit 1 isoform 4 [Nomascus leucogenys]
366	518	ag|143174|Deer_XM_018043344.1	3.08	18	3	3	222889	181667	224333	262667	277778	224333	387000	222000	0.407861	1.24626	27114	PREDICTED: Capra hircus cathepsin D (CTSD) mRNA
366	519	ag|054287|140304CS1901116500001	3.08	10	3	3	222889	181667	224333	262667	277778	224333	387000	222000	0.407861	1.24626	46762	Best_annotation=XP_005227353_PREDICTED: cathepsin D isoform X2 [Bos taurus]
263	268	ag|136766|Deer_XM_018050187.1	7.53	29	6	4	249811	91766.7	328333	329333	382556	306000	618333	223333	0.408534	1.53138	36345	PREDICTED: Capra hircus dihydropyrimidinase like 3 (DPYSL3) transcript variant X3 mRNA
96	38	ag|015662|NODE_1980155	86.85	11	6	1	9348.33	6445	21600	0	119222	0	357667	0	0.409512	12.7533	95638	Best_annotation=NP_001193426_collagen alpha-1(XII) chain precursor [Bos taurus]
525	2109	ag|017932|NODE_2087338	0.82	24	1	1	170000	152667	182333	175000	216667	131333	305000	213667	0.411468	1.27451	10988	Best_annotation=_
43	33	ag|047347|140304CS1900113000001	7.41	57	20	4	1.22522e+06	1.04667e+06	1.01567e+06	1.61333e+06	1.76411e+06	1.61333e+06	2.80333e+06	875667	0.415749	1.43983	49998	Best_annotation=XP_532060_PREDICTED: tubulin beta chain [Canis lupus familiaris]
574	1373	ag|105086|CS60.230410CS6000052700015	2.62	7	1	1	23578.9	6970	32166.7	31600	40244.4	32666.7	71766.7	16300	0.417031	1.7068	37515	Best_annotation=XP_005968986_PREDICTED: heterogeneous nuclear ribonucleoprotein U [Pantholops hodgsonii]
574	1456	ag|189634|Deer_XM_019976126.1	2.62	4	1	1	23578.9	6970	32166.7	31600	40244.4	32666.7	71766.7	16300	0.417031	1.7068	61901	PREDICTED: Bos indicus heterogeneous nuclear ribonucleoprotein U (HNRNPU) transcript variant X1 mRNA
574	1457	ag|149750|Deer_XM_018060250.1	2.62	4	1	1	23578.9	6970	32166.7	31600	40244.4	32666.7	71766.7	16300	0.417031	1.7068	67038	PREDICTED: Capra hircus heterogeneous nuclear ribonucleoprotein U (HNRNPU) transcript variant X2 mRNA
506	889	ag|118378|CS60.230410CS6000097400005	1.83	5	1	1	24613.3	5040	31700	37100	38894.4	44533.3	57200	14950	0.421628	1.58022	56128	Best_annotation=XP_004014154_PREDICTED: protein Niban [Ovis aries]
506	890	ag|039004|NODE_78116	1.83	5	1	1	24613.3	5040	31700	37100	38894.4	44533.3	57200	14950	0.421628	1.58022	63254	Best_annotation=XP_004014154_PREDICTED: protein Niban [Ovis aries]
142	341	ag|134322|tr|Q1PHW0|Q1PHW0_CEREL	3.12	51	6	4	824222	551667	807667	1.11333e+06	664111	548333	806333	637667	0.42188	0.805743	18893	Phosphatidylethanolamine-binding protein OS=Cervus elaphus PE=2 SV=1
142	342	ag|049289|140304CS19016412FFFFE	3.12	40	6	4	824222	551667	807667	1.11333e+06	664111	548333	806333	637667	0.42188	0.805743	24189	Best_annotation=XP_003994758_PREDICTED: phosphatidylethanolamine-binding protein 1 [Felis catus]
275	474	ag|044389|140304CS1901176200002	1.77	17	4	2	89800	59333.3	113667	96400	53444.4	20000	129833	10500	0.430588	0.59515	30486	Best_annotation=XP_532871_PREDICTED: 14-3-3 protein theta isoform 1 [Canis lupus familiaris]
517	1397	ag|107218|CS60.230410CS6000061600015	1.12	6	1	1	47266.7	44866.7	40933.3	56000	65655.6	64933.3	101667	30366.7	0.432145	1.38905	26483	Best_annotation=XP_005392242_PREDICTED: ras-related protein Rab-2A [Chinchilla lanigera]
416	619	ag|100588|CS60.230410CS600002710001A	3.82	36	3	3	223111	214667	177000	277667	281222	223667	401000	219000	0.432887	1.26046	11637	Best_annotation=XP_004285428_PREDICTED: heterogeneous nuclear ribonucleoprotein K [Orcinus orca]
416	620	ag|100587|CS60.230410CS6000027100019	3.82	16	3	3	223111	214667	177000	277667	281222	223667	401000	219000	0.432887	1.26046	27270	Best_annotation=XP_006253616_PREDICTED: heterogeneous nuclear ribonucleoprotein K isoform X3 [Rattus norvegicus]
167	250	ag|109021|CS60.230410CS6000068800015	5.3	20	5	2	168567	133667	150367	221667	243222	176333	405333	148000	0.433438	1.44288	36457	Best_annotation=XP_005893652_PREDICTED: annexin A4 isoform X1 [Bos mutus]
48	17001	tr|A0A212D5P0|A0A212D5P0_CEREH	2.41	63	60	1	3.15222e+06	3.25333e+06	4.23667e+06	1.96667e+06	2.00977e+06	9316.67	4.04667e+06	1.97333e+06	0.441354	0.637573	69081	ALB OS=Cervus elaphus hippelaphus OX=46360 GN=Celaphus_00017423 PE=4 SV=1
532	1140	ag|049525|140304CS1901704800001	6.19	11	1	1	49348.9	8780	81133.3	58133.3	25676.1	7820	61233.3	7975	0.442116	0.520298	14182	Best_annotation=XP_005980382_PREDICTED: 60S acidic ribosomal protein P1-like isoform X1 [Pantholops hodgsonii]
549	17057	tr|A0A212CCX6|A0A212CCX6_CEREH	1.04	14	1	1	117478	132000	92433.3	128000	89666.7	30100	111233	127667	0.442651	0.763265	16090	Uncharacterized protein OS=Cervus elaphus hippelaphus OX=46360 GN=Celaphus_00014155 PE=4 SV=1
433	951	ag|058172|CS60.230410CS6000106600005	2.86	10	1	1	41293.3	3580	66250	54050	24522.2	28200	14900	30466.7	0.444422	0.593854	32682	Best_annotation=XP_006745459_PREDICTED: carbonyl reductase [NADPH] 1-like [Leptonychotes weddellii]
382	670	ag|066836|CS60.230410CS600012140003A	1.93	7	2	2	149511	110867	175000	162667	178111	146667	233333	154333	0.447105	1.19129	30093	Best_annotation=XP_006180883_PREDICTED: galectin-3 [Camelus ferus]
665	17122	tr|W5PID9|W5PID9_SHEEP	1.95	2	1	1	28655.6	19066.7	17200	49700	16766.7	0	17300	33000	0.449758	0.585111	61940	Complement C9 OS=Ovis aries OX=9940 GN=C9 PE=4 SV=1
378	942	ag|113205|CS60.230410CS600008270000D	2.66	21	2	2	236667	185333	247000	277667	300111	159333	397333	343667	0.456356	1.26808	19541	Best_annotation=XP_004677023_PREDICTED: caveolin-1 isoform X1 [Condylura cristata]
378	943	ag|133181|sp|Q09YK1|CAV1_MUNMU	2.66	20	2	2	236667	185333	247000	277667	300111	159333	397333	343667	0.456356	1.26808	20625	Caveolin-1 OS=Muntiacus muntjak GN=CAV1 PE=3 SV=1
363	1398	ag|125103|CS60.230410CS60000289FFFFA	1.96	18	1	1	76943.3	7716.67	61780	161333	135518	160487	216333	29733.3	0.457402	1.76127	11607	Best_annotation=XP_005544397_PREDICTED: SH3 domain-binding glutamic acid-rich-like protein 3 [Macaca fascicularis]
292	16985	tr|A0A212CSV2|A0A212CSV2_CEREH	9.96	26	7	3	1.21256e+06	850000	824333	1.96333e+06	728222	120333	444333	1620000	0.458068	0.600568	35270	SERPINA3-5 (Fragment) OS=Cervus elaphus hippelaphus OX=46360 GN=Celaphus_00015515 PE=3 SV=1
442	17041	sp|Q2KJF1|A1BG_BOVIN	1.25	11	5	1	153111	135000	87333.3	237000	217822	252667	90133.3	310667	0.460839	1.42264	53554	Alpha-1B-glycoprotein OS=Bos taurus OX=9913 GN=A1BG PE=1 SV=1
124	85	ag|046313|140304CS1901623200001	10.81	20	11	11	305444	266667	264333	385333	540333	162333	1.10333e+06	355333	0.463004	1.76901	76647	Best_annotation=NP_001192331_transforming growth factor-beta-induced protein ig-h3 precursor [Bos taurus]
514	1906	ag|053416|140304CS1900144700001	0.56	7	1	1	27106.7	12753.3	32866.7	35700	34583.3	39200	41600	22950	0.466483	1.27582	23687	Best_annotation=XP_005960828_PREDICTED: protein canopy homolog 2 isoform X3 [Pantholops hodgsonii]
661	1586	ag|100933|CS60.230410CS6000029800004	0.55	8	1	1	28010	8230	37500	38300	16455.6	13400	0	35966.7	0.467929	0.587489	30734	Best_annotation=XP_005962621_PREDICTED: complement factor D isoform X2 [Pantholops hodgsonii]
99	394	ag|052143|140304CS1900001300001	5.57	50	6	6	3.31667e+06	2090000	3.37333e+06	4.48667e+06	4.50778e+06	2.60667e+06	7040000	3.87667e+06	0.468539	1.35913	16722	Best_annotation=XP_005955677_PREDICTED: galectin-1 [Pantholops hodgsonii]
99	395	ag|101126|CS60.230410CS6000030100001	5.57	47	6	6	3.31667e+06	2090000	3.37333e+06	4.48667e+06	4.50778e+06	2.60667e+06	7040000	3.87667e+06	0.468539	1.35913	17920	Best_annotation=XP_005955677_PREDICTED: galectin-1 [Pantholops hodgsonii]
429	675	ag|024898|NODE_2415512	2.66	10	2	2	246778	165333	223000	352000	200444	165000	221000	215333	0.468987	0.812247	42171	Best_annotation=XP_002707779_PREDICTED: LOW QUALITY PROTEIN: complement factor H [Bos taurus]
83	970	ag|052374|140304CS19010096FFFCB	4.36	34	2	1	678333	702667	611000	721333	481667	0	656000	789000	0.469222	0.710074	13343	Best_annotation=XP_004764875_PREDICTED: collagen alpha-1(I) chain-like isoform X6 [Mustela putorius furo]
193	127	ag|047576|140304CS1901262700001	1.23	19	6	1	62888.9	61866.7	39433.3	87366.7	102133	70550	195000	40850	0.469799	1.62403	58719	Best_annotation=XP_004005249_PREDICTED: LOW QUALITY PROTEIN: tenascin [Ovis aries]
483	1424	ag|050119|140304CS1901454600001	0.78	6	1	1	48466.7	39866.7	45100	60433.3	38236.7	16376.7	43700	54633.3	0.473507	0.788927	31082	Best_annotation=XP_005896537_PREDICTED: transketolase isoform X1 [Bos mutus]
483	1425	ag|067656|CS60.230410CS600012230002B	0.78	6	1	1	48466.7	39866.7	45100	60433.3	38236.7	16376.7	43700	54633.3	0.473507	0.788927	34216	Best_annotation=XP_005896537_PREDICTED: transketolase isoform X1 [Bos mutus]
527	576	ag|024897|NODE_2415511	2.37	2	1	1	63988.9	42300	53233.3	96433.3	49900	46333.3	39766.7	63600	0.477308	0.779823	84345	Best_annotation=NP_001029108_complement factor H precursor [Bos taurus]
403	1071	ag|161727|Deer_XM_015459022.1	1.66	22	2	1	131544	89300	124333	181000	90642.2	3260	112000	156667	0.481861	0.689062	15935	PREDICTED: Bos taurus apolipoprotein H (APOH) transcript variant X2 mRNA
403	1072	ag|145842|Deer_XM_005694476.3	1.66	16	2	1	131544	89300	124333	181000	90642.2	3260	112000	156667	0.481861	0.689062	22322	PREDICTED: Capra hircus apolipoprotein H (APOH) transcript variant X1 mRNA
120	64	ag|136268|Deer_XM_018050944.1	1.35	27	9	1	214111	168667	175000	298667	173778	165000	125000	231333	0.484884	0.811624	55060	PREDICTED: Capra hircus complement C3 (C3) mRNA
252	575	ag|049179|140304CS1900500500001	1.99	23	3	1	143800	45166.7	289333	96900	77388.9	0	155000	77166.7	0.486474	0.53817	23345	Best_annotation=XP_005613967_PREDICTED: Ig mu chain C region membrane-bound form isoform X4 [Equus caballus]
215	893	ag|049388|140304CS1901015100001	2.34	21	4	4	1260000	1110000	1.08667e+06	1.58333e+06	1.48189e+06	1.08567e+06	1.92667e+06	1.43333e+06	0.490704	1.1761	19443	Best_annotation=XP_003766688_PREDICTED: calmodulin-like [Sarcophilus harrisii]
215	894	ag|115469|CS60.230410CS6000008900001	2.34	20	4	4	1260000	1110000	1.08667e+06	1.58333e+06	1.48189e+06	1.08567e+06	1.92667e+06	1.43333e+06	0.490704	1.1761	20637	Best_annotation=XP_003770562_PREDICTED: calmodulin-like [Sarcophilus harrisii]
165	325	ag|055002|CS60.230410CS6000100500029	2.45	27	7	3	365222	276667	357000	462000	442111	458333	284333	583667	0.493056	1.21053	27715	Best_annotation=XP_005983850_PREDICTED: vitamin D-binding protein isoform X2 [Pantholops hodgsonii]
302	724	ag|109401|CS60.230410CS6000000700009	4.06	42	4	3	2.04556e+06	1420000	1.92333e+06	2.79333e+06	1534240	469387	1830000	2.30333e+06	0.494202	0.750036	16119	Best_annotation=XP_005613969_PREDICTED: Ig mu chain C region membrane-bound form isoform X6 [Equus caballus]
422	1016	ag|008871|NODE_1550959	1.59	6	2	2	156067	92866.7	180667	194667	113661	19650	140667	180667	0.504851	0.728286	56834	Best_annotation=XP_005975812_PREDICTED: alpha-2-antiplasmin isoform X1 [Pantholops hodgsonii]
422	1030	ag|145524|Deer_XM_005693314.3	1.59	6	2	2	156067	92866.7	180667	194667	113661	19650	140667	180667	0.504851	0.728286	58249	PREDICTED: Capra hircus serpin family F member 2 (SERPINF2) transcript variant X1 mRNA
422	1031	ag|161981|Deer_XM_010815811.2	1.59	6	2	2	156067	92866.7	180667	194667	113661	19650	140667	180667	0.504851	0.728286	58821	PREDICTED: Bos taurus serpin peptidase inhibitor clade F (alpha-2 antiplasmin pigment epithelium derived factor) member 2 (SERPINF2) transcript variant X1 mRNA
422	1088	ag|068086|CS60.230410CS600012280000A	1.59	10	2	2	156067	92866.7	180667	194667	113661	19650	140667	180667	0.504851	0.728286	33582	Best_annotation=XP_005975812_PREDICTED: alpha-2-antiplasmin isoform X1 [Pantholops hodgsonii]
149	124	ag|166624|Deer_NM_001314303.1	4.45	13	7	1	86500	52966.7	99200	107333	63635.6	11940	100900	78066.7	0.509312	0.735671	69809	Capra hircus heat shock protein family A (Hsp70) member 2 (HSPA2) mRNA
672	2042	ag|052632|140304CS1901490700001	2.16	2	1	1	21488.9	29400	17500	17566.7	15233.3	8140	30600	6960	0.509523	0.708893	49770	Best_annotation=NP_001032904_coatomer subunit gamma-1 [Bos taurus]
672	17957	tr|A0A212CA55|A0A212CA55_CEREH	2.16	2	1	1	21488.9	29400	17500	17566.7	15233.3	8140	30600	6960	0.509523	0.708893	67799	COPG1 OS=Cervus elaphus hippelaphus OX=46360 GN=Celaphus_00010680 PE=4 SV=1
454	17084	tr|W5PH95|W5PH95_SHEEP	1.9	5	2	1	106533	36133.3	74466.7	209000	160611	238033	58000	185800	0.510137	1.50761	50460	Uncharacterized protein OS=Ovis aries OX=9940 PE=4 SV=1
10	9	ag|042447|NODE_964889	12.3	48	53	10	2290000	1.88333e+06	2190000	2.79667e+06	3.68667e+06	1330000	7.53333e+06	2.19667e+06	0.515062	1.6099	140619	Best_annotation=XP_005678811_PREDICTED: collagen alpha-3(VI) chain [Capra hircus]
59	78	ag|044812|140304CS1901307500001	3.92	40	12	11	1.39556e+06	1.15333e+06	1.29667e+06	1.73667e+06	1754000	1.60667e+06	2.64667e+06	1.00867e+06	0.520695	1.25685	39147	Best_annotation=XP_005681315_PREDICTED: annexin A5 [Capra hircus]
317	687	ag|098933|CS60.230410CS6000015700006	0.48	12	3	3	275556	229667	276667	320333	230667	174667	348000	169333	0.523322	0.837097	38601	Best_annotation=XP_005901333_PREDICTED: malate dehydrogenase cytoplasmic isoform X1 [Bos mutus]
199	215	ag|099400|CS60.230410CS6000019100003	2.95	33	6	6	621667	680333	509667	675000	500111	213333	788000	499000	0.525755	0.804468	25541	Best_annotation=XP_005966006_PREDICTED: peroxiredoxin-1 [Pantholops hodgsonii]
648	2072	ag|051470|001120CECE007366HT_CS19	1.56	8	1	1	245222	230333	222000	283333	194789	84200	326500	173667	0.52925	0.794336	16035	Best_annotation=XP_004319414_PREDICTED: succinyl-CoA:3-ketoacid coenzyme A transferase 1 mitochondrial-like [Tursiops truncatus]
208	785	ag|177794|Deer_XM_004002526.3	5.33	20	4	4	2.64667e+06	2.87333e+06	2.57667e+06	2490000	1.99978e+06	142667	2.73667e+06	3120000	0.530125	0.755584	17517	PREDICTED: Ovis aries S100 calcium binding protein A4 (S100A4) mRNA
463	1725	ag|092607|CS60.230410CS6000143700011	0.98	9	1	1	394222	237667	430000	515000	296111	138333	222333	527667	0.532936	0.751127	11942	Best_annotation=XP_005677218_PREDICTED: apolipoprotein A-II [Capra hircus]
463	1726	ag|166375|Deer_NM_001045916.2	0.98	9	1	1	394222	237667	430000	515000	296111	138333	222333	527667	0.532936	0.751127	12063	Bos taurus apolipoprotein A2 (APOA2) mRNA
265	358	ag|173217|Deer_XM_015099326.1	0.74	11	3	1	99455.6	125650	72566.7	100150	146067	64900	279000	94300	0.534905	1.46866	44371	PREDICTED: Ovis aries tenascin N (TNN) transcript variant X1 mRNA
521	1607	ag|046431|140304CS1901825000001	4.59	11	1	1	12133.3	0	19900	16500	6366.67	0	19100	0	0.550152	0.524725	13623	Best_annotation=XP_005967424_PREDICTED: 6-phosphogluconate dehydrogenase decarboxylating isoform X2 [Pantholops hodgsonii]
521	1608	ag|149672|Deer_XM_013970231.2	4.59	9	1	1	12133.3	0	19900	16500	6366.67	0	19100	0	0.550152	0.524725	17574	PREDICTED: Capra hircus phosphogluconate dehydrogenase (PGD) mRNA
77	115	ag|044204|140304CS1901062800001	4.55	28	12	9	627556	229000	1.08333e+06	570333	814333	731333	1100000	611667	0.552659	1.29763	50340	Best_annotation=XP_005627078_PREDICTED: elongation factor 1-alpha 1 isoform X1 [Canis lupus familiaris]
621	1452	ag|010407|NODE_1655939	0.75	9	1	1	62611.1	36366.7	74766.7	76700	80494.4	56000	129333	56150	0.554077	1.28563	16873	Best_annotation=XP_005960654_PREDICTED: aldose 1-epimerase [Pantholops hodgsonii]
456	1006	ag|105096|CS60.230410CS6000052800005	1.29	5	2	2	137667	120000	141000	152000	117922	97133.3	175667	80966.7	0.555348	0.856578	45135	Best_annotation=XP_005202754_PREDICTED: isocitrate dehydrogenase [NADP] cytoplasmic isoform X1 [Bos taurus]
586	991	ag|110215|CS60.230410CS6000072600008	5.78	4	1	1	45222.2	24266.7	53733.3	57666.7	64744.4	35433.3	122667	36133.3	0.560862	1.4317	38384	Best_annotation=XP_005902962_PREDICTED: aldose reductase [Bos mutus]
75	257	ag|168985|Deer_NM_001009802.1	0.78	25	8	1	575667	475667	417000	834333	723333	790667	352667	1.02667e+06	0.566459	1.25651	39987	Ovis aries alpha 2-HS glycoprotein (AHSG) mRNA
53	117	ag|103580|CS60.230410CS6000045200006	4.26	46	14	14	5560000	3.51667e+06	5.70667e+06	7.45667e+06	4.34222e+06	1.22333e+06	6.40333e+06	5400000	0.56675	0.780975	34954	Best_annotation=XP_004004125_PREDICTED: mimecan isoform 2 [Ovis aries]
189	104	ag|046934|140304CS1901097000003	1.71	10	8	8	343000	390000	276667	362333	277222	265667	456000	110000	0.567475	0.808228	98409	Best_annotation=XP_005896018_PREDICTED: elongation factor 2 [Bos mutus]
279	272	ag|053292|140304CS1901620100001	4.38	10	3	2	156778	37666.7	202333	230333	118544	148000	109733	97900	0.570667	0.75613	47285	Best_annotation=XP_005957809_PREDICTED: biglycan [Pantholops hodgsonii]
606	1475	ag|150245|Deer_XM_018059472.1	1.54	2	1	1	18011.1	16950	15133.3	21950	21288.9	13566.7	30600	19700	0.575381	1.18199	59032	PREDICTED: Capra hircus integrin linked kinase (ILK) transcript variant X2 mRNA
606	1727	ag|108052|CS60.230410CS6000064500012	1.54	3	1	1	18011.1	16950	15133.3	21950	21288.9	13566.7	30600	19700	0.575381	1.18199	33026	Best_annotation=XP_004642102_PREDICTED: integrin-linked protein kinase isoform X1 [Octodon degus]
606	1753	ag|165308|Deer_XM_005216130.2	1.54	2	1	1	18011.1	16950	15133.3	21950	21288.9	13566.7	30600	19700	0.575381	1.18199	58643	PREDICTED: Bos taurus integrin linked kinase (ILK) transcript variant X2 mRNA
558	1040	ag|165334|Deer_XM_010811529.1	1.7	12	1	1	52033.3	48033.3	48233.3	59833.3	42166.7	16300	71466.7	38733.3	0.581746	0.810378	12392	PREDICTED: Bos taurus ribosomal protein S21 (RPS21) transcript variant X2 mRNA
558	1041	ag|063042|CS60.230410CS6000011600002	1.7	12	1	1	52033.3	48033.3	48233.3	59833.3	42166.7	16300	71466.7	38733.3	0.581746	0.810378	12190	Best_annotation=XP_005214906_PREDICTED: 40S ribosomal protein S21 isoform X1 [Bos taurus]
558	1042	ag|185183|Deer_XM_004014418.2	1.7	12	1	1	52033.3	48033.3	48233.3	59833.3	42166.7	16300	71466.7	38733.3	0.581746	0.810378	12356	PREDICTED: Ovis aries ribosomal protein S21 (RPS21) transcript variant X1 mRNA
558	1043	ag|172930|Deer_XM_012188865.2	1.7	12	1	1	52033.3	48033.3	48233.3	59833.3	42166.7	16300	71466.7	38733.3	0.581746	0.810378	12582	PREDICTED: Ovis aries ribosomal protein S21 (RPS21) transcript variant X2 mRNA
250	805	ag|089093|CS60.230410CS6000014100007	1.52	35	3	3	1.13222e+06	933333	1210000	1.25333e+06	1.25367e+06	1150000	1.60333e+06	1.00767e+06	0.586617	1.10726	11089	Best_annotation=XP_004635917_PREDICTED: polyubiquitin-B-like [Octodon degus]
250	806	ag|189445|Deer_XM_019977488.1	1.52	34	3	3	1.13222e+06	933333	1210000	1.25333e+06	1.25367e+06	1150000	1.60333e+06	1.00767e+06	0.586617	1.10726	11207	PREDICTED: Bos indicus ubiquitin C (UBC) mRNA
250	808	ag|112955|CS60.230410CS6000008200004	1.52	23	3	3	1.13222e+06	933333	1210000	1.25333e+06	1.25367e+06	1150000	1.60333e+06	1.00767e+06	0.586617	1.10726	16602	Best_annotation=XP_004643097_PREDICTED: ubiquitin-40S ribosomal protein S27a-like [Octodon degus]
250	809	ag|099110|CS60.230410CS6000016600002	1.52	22	3	3	1.13222e+06	933333	1210000	1.25333e+06	1.25367e+06	1150000	1.60333e+06	1.00767e+06	0.586617	1.10726	17812	Best_annotation=XP_003413301_PREDICTED: ubiquitin-60S ribosomal protein L40-like [Loxodonta africana]
250	810	ag|135997|Deer_XM_018051446.1	1.52	22	3	3	1.13222e+06	933333	1210000	1.25333e+06	1.25367e+06	1150000	1.60333e+06	1.00767e+06	0.586617	1.10726	17666	PREDICTED: Capra hircus ubiquitin A-52 residue ribosomal protein fusion product 1 (UBA52) transcript variant X1 mRNA
250	811	ag|112952|CS60.230410CS6000008200001	1.52	19	3	3	1.13222e+06	933333	1210000	1.25333e+06	1.25367e+06	1150000	1.60333e+06	1.00767e+06	0.586617	1.10726	20594	Best_annotation=XP_003125184_PREDICTED: ubiquitin-40S ribosomal protein S27a [Sus scrofa]
250	812	ag|050150|140304CS1901022200003	1.52	13	3	3	1.13222e+06	933333	1210000	1.25333e+06	1.25367e+06	1150000	1.60333e+06	1.00767e+06	0.586617	1.10726	29357	Best_annotation=XP_006109154_PREDICTED: polyubiquitin-B-like [Myotis lucifugus]
250	813	ag|089091|CS60.230410CS6000014100005	1.52	12	3	3	1.13222e+06	933333	1210000	1.25333e+06	1.25367e+06	1150000	1.60333e+06	1.00767e+06	0.586617	1.10726	32422	Best_annotation=XP_853060_PREDICTED: polyubiquitin-C isoform 2 [Canis lupus familiaris]
250	815	ag|089090|CS60.230410CS6000014100004	1.52	10	3	3	1.13222e+06	933333	1210000	1.25333e+06	1.25367e+06	1150000	1.60333e+06	1.00767e+06	0.586617	1.10726	37371	Best_annotation=XP_004017362_PREDICTED: polyubiquitin-C-like isoform 2 [Ovis aries]
214	548	ag|148564|Deer_XM_005691157.3	0.34	14	5	1	161744	95900	183000	206333	133367	174333	65100	160667	0.586635	0.824552	53951	PREDICTED: Capra hircus fibrinogen alpha chain (FGA) mRNA
214	558	ag|167886|Deer_NM_001033626.1	0.34	25	5	1	161744	95900	183000	206333	133367	174333	65100	160667	0.586635	0.824552	28748	Bos taurus fibrinogen alpha chain (FGA) mRNA
299	528	ag|165282|Deer_XM_010813342.1	6.57	13	3	1	19483.3	58450	0	0	52444.4	0	157333	0	0.587424	2.69176	44473	PREDICTED: Bos taurus tenascin N (TNN) transcript variant X4 mRNA
138	147	ag|047251|140304CS1900470500001	2.65	31	7	5	520333	391000	416333	753667	619889	474667	864667	520333	0.589066	1.19133	31100	Best_annotation=XP_854358_PREDICTED: 14-3-3 protein epsilon isoformX2 [Canis lupus familiaris]
138	148	ag|099928|CS60.230410CS6000022900001	2.65	29	7	5	520333	391000	416333	753667	619889	474667	864667	520333	0.589066	1.19133	32567	Best_annotation=XP_002826859_PREDICTED: 14-3-3 protein epsilon partial [Pongo abelii]
610	1192	ag|166547|Deer_NM_001076798.1	2.12	2	1	1	19594.4	17350	16766.7	24666.7	24264.4	26333.3	36300	10160	0.592031	1.23833	98511	Bos taurus ATPase Na+/K+ transporting subunit alpha 1 (ATP1A1) mRNA
460	1093	ag|045145|140304CS1900010100004	1.09	9	1	1	81133.3	82400	98633.3	62366.7	58877.8	0	128367	48266.7	0.597638	0.725692	19786	Best_annotation=XP_006970612_PREDICTED: ADP-ribosylation factor 2-like isoform X1 [Peromyscus maniculatus bairdii]
460	1094	ag|188738|Deer_XM_019982065.1	1.09	8	1	1	81133.3	82400	98633.3	62366.7	58877.8	0	128367	48266.7	0.597638	0.725692	21362	PREDICTED: Bos indicus ADP-ribosylation factor 2 (LOC109574209) transcript variant X2 mRNA
460	1095	ag|118519|CS60.230410CS6000097700003	1.09	8	1	1	81133.3	82400	98633.3	62366.7	58877.8	0	128367	48266.7	0.597638	0.725692	22542	Best_annotation=XP_006970612_PREDICTED: ADP-ribosylation factor 2-like isoform X1 [Peromyscus maniculatus bairdii]
460	1096	ag|105720|CS60.230410CS6000055800007	1.09	7	1	1	81133.3	82400	98633.3	62366.7	58877.8	0	128367	48266.7	0.597638	0.725692	25266	Best_annotation=XP_005661195_PREDICTED: ADP-ribosylation factor 1 isoform X3 [Sus scrofa]
460	1097	ag|105719|CS60.230410CS6000055800006	1.09	6	1	1	81133.3	82400	98633.3	62366.7	58877.8	0	128367	48266.7	0.597638	0.725692	26553	Best_annotation=XP_003825862_PREDICTED: ADP-ribosylation factor 3 isoform 2 [Pan paniscus]
412	646	ag|112229|CS60.230410CS6000079900015	1.79	2	1	1	90222.2	72066.7	80600	118000	104222	91633.3	76700	144333	0.603895	1.15517	48843	Best_annotation=XP_005675214_PREDICTED: kininogen-1 isoform X2 [Capra hircus]
111	291	ag|104160|CS60.230410CS6000048100008	3.98	25	9	4	668444	545667	649000	810667	852667	281667	1.38333e+06	893000	0.604182	1.2756	31010	Best_annotation=XP_004475040_PREDICTED: tropomyosin alpha-3 chain isoform 5 [Dasypus novemcinctus]
111	313	ag|104162|CS60.230410CS600004810000A	3.98	25	9	4	668444	545667	649000	810667	852667	281667	1.38333e+06	893000	0.604182	1.2756	32002	Best_annotation=XP_004475041_PREDICTED: tropomyosin alpha-3 chain isoform 6 [Dasypus novemcinctus]
592	1560	ag|166540|Deer_NM_001078094.1	2.98	14	1	1	9038.89	0	24566.7	2550	4474.44	0	8033.33	5390	0.605282	0.495022	18375	Bos taurus ubiquitin conjugating enzyme E2 L3 (UBE2L3) mRNA
592	1561	ag|103897|CS60.230410CS600004670000C	2.98	12	1	1	9038.89	0	24566.7	2550	4474.44	0	8033.33	5390	0.605282	0.495022	21853	Best_annotation=XP_003995017_PREDICTED: ubiquitin-conjugating enzyme E2 L3 [Felis catus]
61	47	ag|134733|Deer_NM_001205727.1	3.19	49	19	8	566000	450000	618333	629667	701111	471000	1170000	462333	0.605756	1.23871	52358	Bos taurus pyruvate kinase muscle (PKM) mRNA
377	1032	ag|051012|140304CS1901676000001	1.86	19	2	2	197000	158667	159667	272667	224111	187333	284667	200333	0.60672	1.13762	17171	Best_annotation=XP_006105544_PREDICTED: eukaryotic translation initiation factor 5A-1 isoform X1 [Myotis lucifugus]
143	191	ag|101846|CS60.230410CS6000034700014	3.84	47	9	3	477889	356667	495000	582000	368689	51066.7	698667	356333	0.611023	0.771495	27877	Best_annotation=XP_005957952_PREDICTED: triosephosphate isomerase [Pantholops hodgsonii]
143	192	ag|186696|Deer_XM_019960255.1	3.84	40	9	3	477889	356667	495000	582000	368689	51066.7	698667	356333	0.611023	0.771495	32118	PREDICTED: Bos indicus triosephosphate isomerase 1 (TPI1) mRNA
329	513	ag|049975|140304CS1900066500001	0.76	26	4	1	60800	16600	56800	109000	76333.3	65100	96466.7	67433.3	0.61575	1.25548	22853	Best_annotation=XP_005965431_PREDICTED: N(G) N(G)-dimethylarginine dimethylaminohydrolase 2 [Pantholops hodgsonii]
520	1603	ag|167784|Deer_NM_001046079.1	0.75	7	1	1	60488.9	63433.3	38066.7	79966.7	75700	115667	28966.7	82466.7	0.616316	1.25147	22406	Bos taurus protein HP-25 homolog 2 (MGC137211) mRNA
520	1605	ag|138817|Deer_XM_005680592.3	0.75	7	1	1	60488.9	63433.3	38066.7	79966.7	75700	115667	28966.7	82466.7	0.616316	1.25147	22939	PREDICTED: Capra hircus protein HP-25 homolog 2 (LOC102191021) mRNA
629	1109	ag|104067|CS60.230410CS6000047700001	0.95	4	1	1	191667	245000	0	330000	111333	0	334000	0	0.618241	0.58087	33855	Best_annotation=XP_005909803_PREDICTED: voltage-dependent anion-selective channel protein 2 isoform X2 [Bos mutus]
629	1110	ag|155845|Deer_NM_174486.3	0.95	4	1	1	191667	245000	0	330000	111333	0	334000	0	0.618241	0.58087	35333	Bos taurus voltage dependent anion channel 2 (VDAC2) mRNA
304	659	ag|098964|CS60.230410CS600001590000F	1.79	32	4	4	444222	264000	485667	583000	382111	252333	474000	420000	0.619557	0.86018	21059	Best_annotation=XP_005892755_PREDICTED: protein DJ-1 [Bos mutus]
212	493	ag|109623|CS60.230410CS6000070500006	0.36	11	5	1	370111	395667	304000	410667	413000	475000	267333	496667	0.621756	1.11588	53655	Best_annotation=XP_005960446_PREDICTED: hemopexin [Pantholops hodgsonii]
22	11	ag|099399|CS60.230410CS6000019100002	3.26	63	23	2	1807000	2.00667e+06	924333	2490000	2.27711e+06	3.04667e+06	744667	3040000	0.627235	1.26016	45349	Best_annotation=XP_005675608_PREDICTED: serotransferrin [Capra hircus]
441	948	ag|011012|NODE_1670480	0.94	2	2	2	160778	110667	117333	254333	126978	41266.7	151333	188333	0.627242	0.789772	147540	Best_annotation=XP_003582638_PREDICTED: CD109 antigen isoformX1 [Bos taurus]
655	2188	ag|188496|Deer_XM_019982968.1	1.94	2	1	1	62530	86100	48756.7	52733.3	106316	16146.7	30133.3	272667	0.630154	1.70023	121308	PREDICTED: Bos indicus myosin VIIB (MYO7B) mRNA
516	626	ag|007660|NODE_1487718	2.68	14	2	2	144178	110333	186333	135867	180400	132667	312333	96200	0.634173	1.25123	23881	Best_annotation=NP_001193332_lysyl oxidase precursor [Sus scrofa]
516	627	ag|175259|Deer_XM_015095952.1	2.68	10	2	2	144178	110333	186333	135867	180400	132667	312333	96200	0.634173	1.25123	35281	PREDICTED: Ovis aries lysyl oxidase (LOX) transcript variant X1 mRNA
486	1945	ag|041537|NODE_944840	0.23	22	1	1	594389	544667	610000	628500	490556	109667	547333	814667	0.642376	0.825311	11892	Best_annotation=_
1	4	ag|173667|Deer_XM_015098715.1	1.44	64	56	7	8.61889e+06	1.09667e+07	6450000	8440000	9.63889e+06	9980000	6770000	1.21667e+07	0.643427	1.11834	108216	PREDICTED: Ovis aries collagen type I alpha 1 (COL1A1) transcript variant X1 mRNA
38	338	ag|101027|CS60.230410CS600000030004A	1.78	25	7	1	60377.8	36166.7	29300	115667	37823.3	0	4470	109000	0.643451	0.626445	27618	Best_annotation=NP_001077269_immunoglobulin lambda-like polypeptide 1 precursor [Bos taurus]
285	655	ag|173540|Deer_XM_004013066.3	1.34	18	3	3	564667	450000	494667	749333	626000	775000	601667	501333	0.643691	1.10862	28646	PREDICTED: Ovis aries Rho GDP dissociation inhibitor (GDI) alpha (ARHGDIA) transcript variant X1 mRNA
285	656	ag|161782|Deer_XM_005221011.3	1.34	16	3	3	564667	450000	494667	749333	626000	775000	601667	501333	0.643691	1.10862	32842	PREDICTED: Bos taurus Rho GDP dissociation inhibitor (GDI) alpha (ARHGDIA) transcript variant X1 mRNA
110	185	ag|146055|Deer_XM_018063545.1	1.49	19	8	2	392000	380333	256000	539667	312589	55433.3	361000	521333	0.644535	0.797421	53553	PREDICTED: Capra hircus alpha-1-B glycoprotein (A1BG) mRNA
63	145	ag|023255|NODE_2382957	0.31	64	13	1	386222	360000	355333	443333	417667	305667	488333	459000	0.646145	1.08142	19928	Best_annotation=NP_001029225_prelamin-A/C [Bos taurus]
117	385	ag|113748|CS60.230410CS6000084200018	4.14	35	6	4	1.71889e+06	533333	1690000	2.93333e+06	2.20889e+06	1.52667e+06	1440000	3660000	0.650942	1.28507	26618	Best_annotation=NP_998993_IgG heavy chain precursor [Sus scrofa]
315	610	ag|140323|Deer_XM_005678648.3	1.96	16	4	4	201667	214000	214333	176667	159200	45833.3	329000	102767	0.652372	0.789421	31569	PREDICTED: Capra hircus adenylate cyclase associated protein 1 (CAP1) transcript variant X3 mRNA
315	612	ag|047345|140304CS1901129900001	1.96	10	4	4	201667	214000	214333	176667	159200	45833.3	329000	102767	0.652372	0.789421	52269	Best_annotation=XP_005204707_PREDICTED: adenylyl cyclase-associated protein 1 isoform X1 [Bos taurus]
198	577	ag|100993|CS60.230410CS6000000300028	0.7	38	5	1	188522	105900	144667	315000	232400	246333	116200	334667	0.652373	1.23275	15777	Best_annotation=XP_005691794_PREDICTED: immunoglobulin lambda-like polypeptide 1-like isoform X1 [Capra hircus]
198	579	ag|101021|CS60.230410CS6000000300044	0.7	23	5	1	188522	105900	144667	315000	232400	246333	116200	334667	0.652373	1.23275	25682	Best_annotation=XP_006172645_PREDICTED: uncharacterized protein LOC102511023 [Camelus ferus]
534	974	ag|081001|CS60.230410CS6000134300013	0.51	11	1	1	198744	139567	187000	269667	218444	234667	232000	188667	0.65469	1.09912	23061	Best_annotation=XP_005597585_PREDICTED: clathrin heavy chain 1 isoform X3 [Equus caballus]
534	1037	ag|002806|NODE_1203302	0.51	9	1	1	198744	139567	187000	269667	218444	234667	232000	188667	0.65469	1.09912	29134	Best_annotation=XP_005597585_PREDICTED: clathrin heavy chain 1 isoform X3 [Equus caballus]
249	471	ag|101675|CS60.230410CS6000033700008	2.7	29	4	4	452111	394000	462667	499667	375778	130333	664000	333000	0.655422	0.831162	20101	Best_annotation=XP_003912212_PREDICTED: profilin-1 [Papio anubis]
249	472	ag|182562|Deer_XM_012122772.2	2.7	29	4	4	452111	394000	462667	499667	375778	130333	664000	333000	0.655422	0.831162	20229	PREDICTED: Ovis aries musimon profilin 1 (PFN1) transcript variant X2 mRNA
249	473	ag|048573|140304CS1901523500001	2.7	27	4	4	452111	394000	462667	499667	375778	130333	664000	333000	0.655422	0.831162	22301	Best_annotation=XP_003912212_PREDICTED: profilin-1 [Papio anubis]
243	184	ag|031741|NODE_42247	4.63	14	5	3	378556	312333	374667	448667	282656	16300	663667	168000	0.655691	0.746669	62488	Best_annotation=XP_005898594_PREDICTED: plastin-3-like isoform X4 [Bos mutus]
572	1377	ag|155895|Deer_NM_001015531.1	3.09	7	1	1	21157.8	42766.7	20706.7	0	14283.3	23500	0	19350	0.656137	0.675087	24915	Bos taurus ribosomal protein S5 (RPS5) mRNA
572	1378	ag|043702|140304CS1901925900001	3.09	7	1	1	21157.8	42766.7	20706.7	0	14283.3	23500	0	19350	0.656137	0.675087	25630	Best_annotation=XP_004087303_PREDICTED: 40S ribosomal protein S5-like [Nomascus leucogenys]
572	1379	ag|102270|CS60.230410CS6000037900005	3.09	6	1	1	21157.8	42766.7	20706.7	0	14283.3	23500	0	19350	0.656137	0.675087	29168	Best_annotation=XP_004087303_PREDICTED: 40S ribosomal protein S5-like [Nomascus leucogenys]
550	1723	ag|056483|CS60.230410CS600010320002A	1.16	8	1	1	38731.1	43466.7	5560	67166.7	53577.8	85566.7	3600	71566.7	0.657267	1.38333	23921	Best_annotation=XP_005899360_PREDICTED: calpastatin isoform X3 [Bos mutus]
616	1322	ag|135929|Deer_XM_005682038.2	5.55	5	1	1	22538.9	5683.33	31666.7	30266.7	33005.6	7050	73033.3	18933.3	0.658909	1.46438	33105	PREDICTED: Capra hircus calnexin (CANX) transcript variant X2 mRNA
616	1323	ag|104664|CS60.230410CS600005050000E	5.55	5	1	1	22538.9	5683.33	31666.7	30266.7	33005.6	7050	73033.3	18933.3	0.658909	1.46438	33063	Best_annotation=XP_005893495_PREDICTED: calnexin isoform X2 [Bos mutus]
451	746	ag|109378|CS60.230410CS6000069900012	0.55	10	2	1	66000	45300	77533.3	75166.7	78244.4	125667	54633.3	54433.3	0.660796	1.18552	39431	Best_annotation=XP_004004032_PREDICTED: protein AMBP [Ovis aries]
492	971	ag|052935|140304CS1901683300002	0.3	8	1	1	154289	154333	129533	179000	140200	136333	189333	94933.3	0.671362	0.908685	20811	Best_annotation=XP_006864193_PREDICTED: thioredoxin domain-containing protein 5 [Chrysochloris asiatica]
469	17013	tr|A0A212CIC4|A0A212CIC4_CEREH	2.22	9	3	1	168706	110450	186000	209667	187778	240000	138667	184667	0.672384	1.11305	39577	FETUB (Fragment) OS=Cervus elaphus hippelaphus OX=46360 GN=Celaphus_00012582 PE=4 SV=1
490	729	ag|141938|Deer_XM_005679443.3	2.46	4	1	1	123056	66666.7	229667	72833.3	93677.8	22300	141667	117067	0.672708	0.761264	37397	PREDICTED: Capra hircus calumenin (CALU) transcript variant X1 mRNA
156	173	ag|103600|CS60.230410CS6000045300008	3.57	38	8	8	1.24022e+06	584000	1.69333e+06	1.44333e+06	984000	588000	1.88667e+06	477333	0.672936	0.793406	32005	Best_annotation=XP_004011906_PREDICTED: carbonic anhydrase 3 [Ovis aries]
230	544	ag|087839|CS60.230410CS6000014000014	3.27	17	3	3	410000	220000	282667	727333	524556	479667	198000	896000	0.680089	1.2794	28765	Best_annotation=XP_004031428_PREDICTED: uncharacterized protein LOC101151870 [Gorilla gorilla gorilla]
503	1451	ag|103286|CS60.230410CS600004360001D	2.12	10	1	1	28177.8	0	0	84533.3	14308.4	41766.7	1158.5	0	0.68103	0.50779	20072	Best_annotation=XP_005909136_PREDICTED: translocon-associated protein subunit delta [Bos mutus]
503	1511	ag|127512|CS60.230410CS60000436FFFE3	2.12	24	1	1	28177.8	0	0	84533.3	14308.4	41766.7	1158.5	0	0.68103	0.50779	8707	Best_annotation=XP_005674066_PREDICTED: translocon-associated protein subunit delta isoform X2 [Sus scrofa]
503	1512	ag|154821|Deer_XM_018044774.1	2.12	23	1	1	28177.8	0	0	84533.3	14308.4	41766.7	1158.5	0	0.68103	0.50779	9119	PREDICTED: Capra hircus signal sequence receptor subunit 4 (SSR4) transcript variant X2 mRNA
294	657	ag|168505|Deer_NM_001037469.2	4.23	34	4	4	465222	958000	228000	209667	639889	309333	1.26333e+06	347000	0.683075	1.37545	14742	Bos taurus histone H2B-like (H2B) mRNA
294	658	ag|171013|Deer_XM_004019074.3	4.23	31	4	4	465222	958000	228000	209667	639889	309333	1.26333e+06	347000	0.683075	1.37545	15641	PREDICTED: Ovis aries histone H2B type 1 (LOC101110457) mRNA
458	694	ag|102751|CS60.230410CS6000040500003	0.19	13	2	2	105644	86733.3	96533.3	133667	122361	188333	112950	65800	0.686088	1.15824	30437	Best_annotation=XP_006533946_PREDICTED: heterogeneous nuclear ribonucleoprotein H isoform X9 [Mus musculus]
351	265	ag|188985|Deer_XM_019980348.1	3.38	3	2	2	112033	160667	56266.7	119167	85063.3	5590	189333	60266.7	0.687661	0.759268	120923	PREDICTED: Bos indicus clathrin heavy chain (CLTC) mRNA
351	266	ag|145706|Deer_XM_018064142.1	3.38	3	2	2	112033	160667	56266.7	119167	85063.3	5590	189333	60266.7	0.687661	0.759268	123165	PREDICTED: Capra hircus clathrin heavy chain (CLTC) transcript variant X4 mRNA
356	606	ag|166137|Deer_NM_001046092.2	1.08	25	3	2	68211.1	26533.3	88366.7	89733.3	55310	22496.7	98033.3	45400	0.694694	0.810865	23336	Bos taurus septin 2 (SEPT2) mRNA
602	16993	tr|A0A212D7B8|A0A212D7B8_CEREH	0.86	4	2	1	97688.9	78233.3	67833.3	147000	75544.4	0	66300	160333	0.696095	0.773317	84400	Amine oxidase OS=Cervus elaphus hippelaphus OX=46360 GN=Celaphus_00001373 PE=3 SV=1
312	557	ag|118926|CS60.230410CS600009850000E	3.79	20	4	3	260189	40900	389333	350333	340444	212000	655667	153667	0.698966	1.30845	38684	Best_annotation=XP_005900513_PREDICTED: dihydropyrimidinase-related protein 3 isoform X2 [Bos mutus]
287	617	ag|163176|Deer_XM_010810128.2	2	17	2	2	153111	137667	145000	176667	179222	129000	302000	106667	0.699245	1.17054	17591	PREDICTED: Bos taurus RAB1A member RAS oncogene family (RAB1A) transcript variant X2 mRNA
287	618	ag|101808|CS60.230410CS6000034500009	2	11	2	2	153111	137667	145000	176667	179222	129000	302000	106667	0.699245	1.17054	26556	Best_annotation=XP_006168107_PREDICTED: ras-related protein Rab-1A isoform X2 [Tupaia chinensis]
383	506	ag|065893|CS60.230410CS6000120400020	2.02	11	3	3	214444	193667	178333	271333	247889	195333	396667	151667	0.700009	1.15596	44942	Best_annotation=XP_004399328_PREDICTED: guanine nucleotide-binding protein G(i) subunit alpha-2 isoform 1 [Odobenus rosmarus divergens]
408	553	ag|016838|NODE_2040489	3.44	10	2	2	203556	137333	153333	320000	157956	49566.7	79300	345000	0.701248	0.775983	48733	Best_annotation=XP_005675518_PREDICTED: ceruloplasmin-like [Capra hircus]
407	802	ag|146604|Deer_XM_018062680.1	1.26	15	2	2	99933.3	77566.7	114333	107900	121067	23200	192333	147667	0.704491	1.21147	26754	PREDICTED: Capra hircus EH domain containing 2 (EHD2) mRNA
159	204	ag|027193|NODE_2555259	0.96	29	5	2	271556	204333	227667	382667	243111	182667	326667	220000	0.707875	0.895254	21351	Best_annotation=XP_005966890_PREDICTED: neuroblast differentiation-associated protein AHNAK [Pantholops hodgsonii]
641	2143	ag|041709|NODE_949217	0.22	7	1	1	311111	360000	357333	216000	333111	318000	387667	293667	0.710961	1.07071	13160	Best_annotation=_
508	967	ag|046694|010608CEEF015209HT_CS19	0.85	8	1	1	114911	78400	103000	163333	103844	107333	122333	81866.7	0.711474	0.903694	13812	Best_annotation=XP_005601721_PREDICTED: 10 kDa heat shock protein mitochondrial [Equus caballus]
508	968	ag|099740|CS60.230410CS6000021500012	0.85	6	1	1	114911	78400	103000	163333	103844	107333	122333	81866.7	0.711474	0.903694	16986	Best_annotation=XP_536017_PREDICTED: 10 kDa heat shock protein mitochondrial isoform 2 [Canis lupus familiaris]
134	217	ag|094343|CS60.230410CS6000014500003	0.38	39	9	5	2.51556e+06	2.37667e+06	2250000	2920000	2.42889e+06	2.39333e+06	2.57333e+06	2320000	0.712313	0.965548	30867	Best_annotation=XP_004004354_PREDICTED: annexin A1 [Ovis aries]
217	157	ag|138856|Deer_XM_018048184.1	2.22	10	4	1	70422.2	70166.7	63333.3	77766.7	53928.9	5120	136667	20000	0.713287	0.765794	64826	PREDICTED: Capra hircus heat shock protein 90 beta family member 1 (HSP90B1) mRNA
21	45	ag|051507|140304CS1901128600001	0.87	53	20	20	5.08667e+06	4630000	4.55667e+06	6.07333e+06	4.80889e+06	5440000	5180000	3.80667e+06	0.714629	0.945391	40258	Best_annotation=XP_005685754_PREDICTED: annexin A2 [Capra hircus]
60	102	ag|005112|NODE_1301825	1.63	34	12	12	2570000	2.16667e+06	2560000	2.98333e+06	2.27356e+06	874000	2.52667e+06	3420000	0.723947	0.884652	39139	Best_annotation=NP_001009799_alpha-1-antiproteinase precursor [Ovis aries]
540	1300	ag|103368|CS60.230410CS6000004400021	0.43	25	2	1	115067	30200	167333	147667	137939	90350	225333	98133.3	0.727636	1.19877	19664	Best_annotation=XP_006750672_PREDICTED: actin gamma-enteric smooth muscle-like [Leptonychotes weddellii]
161	330	ag|054060|140304CS1901537300001	1.44	43	6	6	838444	803333	807000	905000	749222	494667	1.22667e+06	526333	0.730209	0.893586	21732	Best_annotation=XP_006216778_PREDICTED: cofilin-1 isoform X1 [Vicugna pacos]
161	331	ag|109990|CS60.230410CS6000071800008	1.44	41	6	6	838444	803333	807000	905000	749222	494667	1.22667e+06	526333	0.730209	0.893586	22583	Best_annotation=XP_006216778_PREDICTED: cofilin-1 isoform X1 [Vicugna pacos]
537	1360	ag|054931|CS60.230410CS6000100400025	1.11	5	1	1	65500	41300	73500	81700	53688.9	0	101667	59400	0.730453	0.819678	37855	Best_annotation=XP_004437757_PREDICTED: serine/threonine-protein phosphatase PP1-alpha catalytic subunit isoform 1 [Ceratotherium simum simum]
537	1361	ag|143143|Deer_XM_018043394.1	1.11	5	1	1	65500	41300	73500	81700	53688.9	0	101667	59400	0.730453	0.819678	40387	PREDICTED: Capra hircus protein phosphatase 1 catalytic subunit alpha (PPP1CA) mRNA
537	1405	ag|135172|Deer_XM_018055488.1	1.11	9	1	1	65500	41300	73500	81700	53688.9	0	101667	59400	0.730453	0.819678	23240	PREDICTED: Capra hircus protein phosphatase 1 catalytic subunit beta (PPP1CB) transcript variant X4 mRNA
537	1406	ag|109989|CS60.230410CS6000071800007	1.11	6	1	1	65500	41300	73500	81700	53688.9	0	101667	59400	0.730453	0.819678	34220	Best_annotation=XP_003462982_PREDICTED: serine/threonine-protein phosphatase PP1-gamma catalytic subunit isoform X1 [Cavia porcellus]
537	1530	ag|171753|Deer_XM_004017367.3	1.11	9	1	1	65500	41300	73500	81700	53688.9	0	101667	59400	0.730453	0.819678	22219	PREDICTED: Ovis aries protein phosphatase 1 catalytic subunit gamma isozyme (PPP1CC) transcript variant X1 partial mRNA
537	1531	ag|183551|Deer_XM_012110192.2	1.11	9	1	1	65500	41300	73500	81700	53688.9	0	101667	59400	0.730453	0.819678	23784	PREDICTED: Ovis aries musimon protein phosphatase 1 catalytic subunit gamma isozyme (PPP1CC) transcript variant X2 mRNA
537	1532	ag|107672|CS60.230410CS600006320000D	1.11	7	1	1	65500	41300	73500	81700	53688.9	0	101667	59400	0.730453	0.819678	31329	Best_annotation=XP_004777542_PREDICTED: serine/threonine-protein phosphatase PP1-beta catalytic subunit isoform X5 [Mustela putorius furo]
350	1145	ag|139723|Deer_XM_005677583.3	1.7	17	2	2	192222	179667	198333	198667	165311	48933.3	299667	147333	0.731791	0.86	13564	PREDICTED: Capra hircus S100 calcium binding protein A11 (S100A11) mRNA
72	51	ag|048082|140304CS1901089800001	0.91	30	11	11	853444	684333	884667	991333	912000	841333	1.16667e+06	728000	0.731837	1.06861	51863	Best_annotation=XP_005216985_PREDICTED: alpha-enolase isoform X1 [Bos taurus]
436	16980	tr|L8IKQ8|L8IKQ8_9CETA	2.96	20	6	3	158478	87000	45100	343333	234796	51450	42605	610333	0.734263	1.48157	43041	Apolipoprotein A-IV OS=Bos mutus OX=72004 GN=M91_20362 PE=3 SV=1
436	16981	sp|Q32PJ2|APOA4_BOVIN	2.96	20	6	3	158478	87000	45100	343333	234796	51450	42605	610333	0.734263	1.48157	43018	Apolipoprotein A-IV OS=Bos taurus OX=9913 GN=APOA4 PE=2 SV=1
436	16982	tr|F1N3Q7|F1N3Q7_BOVIN	2.96	20	6	3	158478	87000	45100	343333	234796	51450	42605	610333	0.734263	1.48157	42990	Apolipoprotein A-IV OS=Bos taurus OX=9913 GN=APOA4 PE=3 SV=1
168	119	ag|045839|140304CS1901088000001	1.36	9	5	5	452333	295333	487000	574667	395667	340333	655000	191667	0.74041	0.874724	59551	Best_annotation=XP_005221055_PREDICTED: protein disulfide-isomerase isoform X1 [Bos taurus]
554	637	ag|139746|Deer_XM_005677603.3	0.92	5	1	1	106354	196000	28030	95033.3	79578.9	192500	0	46236.7	0.741814	0.748242	53701	PREDICTED: Capra hircus selenium binding protein 1 (SELENBP1) mRNA
554	638	ag|113440|CS60.230410CS600008330001D	0.92	4	1	1	106354	196000	28030	95033.3	79578.9	192500	0	46236.7	0.741814	0.748242	55886	Best_annotation=XP_005895013_PREDICTED: selenium-binding protein 1 [Bos mutus]
419	1517	ag|170528|Deer_XM_012102148.2	0.67	19	1	1	201656	109633	189333	306000	246956	25200	418333	297333	0.744089	1.22464	13848	PREDICTED: Ovis aries barrier to autointegration factor 1 (BANF1) transcript variant X2 mRNA
419	1518	ag|182979|Deer_XM_012117290.2	0.67	18	1	1	201656	109633	189333	306000	246956	25200	418333	297333	0.744089	1.22464	14778	PREDICTED: Ovis aries musimon barrier to autointegration factor 1 (BANF1) transcript variant X1 mRNA
419	1519	ag|143212|Deer_XM_005699911.3	0.67	18	1	1	201656	109633	189333	306000	246956	25200	418333	297333	0.744089	1.22464	15012	PREDICTED: Capra hircus barrier to autointegration factor 1 (BANF1) transcript variant X2 mRNA
181	244	ag|099457|CS60.230410CS6000019900001	1.56	30	7	7	445889	401000	415333	521333	394222	196667	673333	312667	0.745353	0.884127	29229	Best_annotation=XP_005890901_PREDICTED: peroxiredoxin-6 [Bos mutus]
556	1583	ag|106125|CS60.230410CS6000057400006	0.11	10	1	1	5214.44	1350	3203.33	11090	6447.22	3360	10075	5906.67	0.747276	1.23642	14022	Best_annotation=XP_004005984_PREDICTED: LOW QUALITY PROTEIN: EGF-containing fibulin-like extracellular matrix protein 1 [Ovis aries]
556	1584	ag|135340|Deer_XM_018055266.1	0.11	8	1	1	5214.44	1350	3203.33	11090	6447.22	3360	10075	5906.67	0.747276	1.23642	18267	PREDICTED: Capra hircus EGF containing fibulin like extracellular matrix protein 1 (EFEMP1) transcript variant X5 mRNA
599	1895	ag|100808|CS60.230410CS6000028800004	0.93	7	1	1	33077.8	53533.3	45700	0	24988.9	18133.3	56833.3	0	0.749599	0.755459	22908	Best_annotation=XP_007083757_PREDICTED: 60S ribosomal protein L11 [Panthera tigris altaica]
599	1896	ag|147959|Deer_XM_013974382.2	0.93	6	1	1	33077.8	53533.3	45700	0	24988.9	18133.3	56833.3	0	0.749599	0.755459	24786	PREDICTED: Capra hircus ribosomal protein L11 (RPL11) transcript variant X1 mRNA
394	863	ag|101199|CS60.230410CS6000030700006	0.79	9	2	2	164067	83533.3	167667	241000	133989	0	263667	138300	0.75159	0.816673	37677	Best_annotation=XP_006209310_PREDICTED: heterogeneous nuclear ribonucleoprotein K isoform X2 [Vicugna pacos]
186	154	ag|104737|CS60.230410CS6000051000002	2.27	21	4	4	383111	277333	312667	559333	322444	53000	595333	319000	0.752962	0.841647	45431	Best_annotation=XP_005904072_PREDICTED: creatine kinase B-type [Bos mutus]
186	155	ag|148308|Deer_XM_018066231.1	2.27	20	4	4	383111	277333	312667	559333	322444	53000	595333	319000	0.752962	0.841647	46897	PREDICTED: Capra hircus creatine kinase B (CKB) mRNA
426	1180	ag|189456|Deer_XM_019977414.1	7.9	27	2	1	61555.6	0	0	184667	37333.3	0	0	112000	0.753437	0.606498	11156	PREDICTED: Bos indicus immunoglobulin lambda-like polypeptide 5 (LOC109571157) mRNA
176	132	ag|142495|Deer_XM_013974027.2	1.09	14	6	1	130400	65866.7	114667	210667	115778	91666.7	137000	118667	0.759079	0.887866	66236	PREDICTED: Capra hircus heat shock 70 kDa protein 1B (LOC102178315) mRNA
417	887	ag|102740|CS60.230410CS600004040000A	6.66	5	1	1	81733.3	0	86200	159000	57555.6	0	172667	0	0.759167	0.704187	30446	Best_annotation=NP_001272600_CD9 molecule [Capra hircus]
309	17099	tr|A0A212CRW4|A0A212CRW4_CEREH	1.63	9	4	2	438000	232667	560000	521333	368222	0	474667	630000	0.76264	0.84069	34076	SERPINA3-7 OS=Cervus elaphus hippelaphus OX=46360 GN=Celaphus_00015514 PE=3 SV=1
108	106	ag|045699|140304CS1901107200001	1.54	35	9	7	1.42889e+06	1.30667e+06	1820000	1160000	1.59878e+06	969667	2.64333e+06	1.18333e+06	0.777756	1.1189	36134	Best_annotation=NP_001177319_glyceraldehyde-3-phosphate dehydrogenase [Ovis aries]
370	183	ag|144349|Deer_XM_005695800.3	1.47	1	1	1	35167.2	24733.3	50633.3	30135	29032.2	13066.7	67200	6830	0.781982	0.825548	106027	PREDICTED: Capra hircus filamin B (FLNB) transcript variant X5 mRNA
587	1309	ag|099653|CS60.230410CS6000002100007	0.71	11	1	1	32077.8	43866.7	31500	20866.7	35388.9	37300	49966.7	18900	0.782278	1.10322	12494	Best_annotation=XP_005396136_PREDICTED: 40S ribosomal protein S20 [Chinchilla lanigera]
587	1310	ag|099652|CS60.230410CS6000002100006	0.71	7	1	1	32077.8	43866.7	31500	20866.7	35388.9	37300	49966.7	18900	0.782278	1.10322	19879	Best_annotation=XP_006256298_PREDICTED: 40S ribosomal protein S20-like partial [Rattus norvegicus]
224	16965	tr|A0A212C7P2|A0A212C7P2_CEREH	1.43	14	7	7	454667	363333	330667	670000	406333	416000	187000	616000	0.783437	0.893695	78535	PLG (Fragment) OS=Cervus elaphus hippelaphus OX=46360 GN=Celaphus_00019151 PE=3 SV=1
192	16970	tr|A0A212DD04|A0A212DD04_CEREH	1.49	24	10	4	814000	716667	508667	1.21667e+06	931778	748333	440333	1.60667e+06	0.786835	1.14469	56990	A1BG OS=Cervus elaphus hippelaphus OX=46360 GN=Celaphus_00004945 PE=4 SV=1
425	1054	ag|105837|CS60.230410CS6000056200012	1.42	7	1	1	110700	84100	120000	128000	142528	360333	0	67250	0.789361	1.28751	34694	Best_annotation=XP_005079962_PREDICTED: actin-related protein 3 [Mesocricetus auratus]
35	21	ag|151585|Deer_XM_005687493.3	1.12	36	20	1	67022.2	100433	67666.7	32966.7	58100	18733.3	103333	52233.3	0.790245	0.866877	88715	PREDICTED: Capra hircus periostin (POSTN) transcript variant X3 mRNA
384	527	ag|102823|CS60.230410CS6000004100002	1.52	5	1	1	14762.2	0	38500	5786.67	11099.4	5685	21166.7	6446.67	0.792137	0.751882	53231	Best_annotation=XP_006201951_PREDICTED: septin-7 isoform X1 [Vicugna pacos]
513	1649	ag|105267|CS60.230410CS6000053500008	0.95	11	1	1	43766.7	28533.3	39566.7	63200	40422.2	30350	53366.7	37550	0.798815	0.923585	13990	Best_annotation=NP_001068847_protein CutA precursor [Bos taurus]
513	1650	ag|050458|140304CS1901023300001	0.95	8	1	1	43766.7	28533.3	39566.7	63200	40422.2	30350	53366.7	37550	0.798815	0.923585	18496	Best_annotation=XP_006105503_PREDICTED: protein CutA isoform X1 [Myotis lucifugus]
513	1651	ag|105266|CS60.230410CS6000053500007	0.95	7	1	1	43766.7	28533.3	39566.7	63200	40422.2	30350	53366.7	37550	0.798815	0.923585	20488	Best_annotation=XP_005223273_PREDICTED: protein CutA isoform X1 [Bos taurus]
513	1652	ag|188091|Deer_XM_019985242.1	0.95	7	1	1	43766.7	28533.3	39566.7	63200	40422.2	30350	53366.7	37550	0.798815	0.923585	20586	PREDICTED: Bos indicus cutA divalent cation tolerance homolog (CUTA) transcript variant X1 mRNA
513	1653	ag|142912|Deer_XM_005696228.3	0.95	7	1	1	43766.7	28533.3	39566.7	63200	40422.2	30350	53366.7	37550	0.798815	0.923585	22018	PREDICTED: Capra hircus cutA divalent cation tolerance homolog (CUTA) transcript variant X2 mRNA
277	16977	tr|A0A212DAA2|A0A212DAA2_CEREH	1.38	26	15	3	719333	555000	573000	1030000	648667	869333	232000	844667	0.799244	0.901761	80426	FGA OS=Cervus elaphus hippelaphus OX=46360 GN=Celaphus_00000577 PE=4 SV=1
577	897	ag|026129|NODE_2528725	0.72	9	1	1	80055.6	41733.3	114333	84100	70722.2	17200	87633.3	107333	0.800264	0.883414	18513	Best_annotation=XP_005675205_PREDICTED: adiponectin isoform X1 [Capra hircus]
577	898	ag|178259|Deer_XM_012097442.2	0.72	6	1	1	80055.6	41733.3	114333	84100	70722.2	17200	87633.3	107333	0.800264	0.883414	26455	PREDICTED: Ovis aries adiponectin C1Q and collagen domain containing (ADIPOQ) transcript variant X3 mRNA
618	1376	ag|086445|CS60.230410CS600013880005F	0.93	6	1	1	4561.22	1077	7986.67	4620	5895.56	0	15033.3	2653.33	0.804433	1.29254	21062	Best_annotation=XP_005597585_PREDICTED: clathrin heavy chain 1 isoform X3 [Equus caballus]
618	1390	ag|002805|NODE_1203298	0.93	6	1	1	4561.22	1077	7986.67	4620	5895.56	0	15033.3	2653.33	0.804433	1.29254	24473	Best_annotation=XP_005597585_PREDICTED: clathrin heavy chain 1 isoform X3 [Equus caballus]
618	1667	ag|060594|CS60.230410CS6000111100026	0.93	10	1	1	4561.22	1077	7986.67	4620	5895.56	0	15033.3	2653.33	0.804433	1.29254	13967	Best_annotation=XP_003767981_PREDICTED: clathrin heavy chain 1 [Sarcophilus harrisii]
637	1965	ag|122359|CS60.230410CS60000148FFFFE	0.61	15	1	1	49088.9	56333.3	33933.3	57000	41437.8	3480	97766.7	23066.7	0.809476	0.844138	11618	Best_annotation=XP_005353397_PREDICTED: peptidyl-prolyl cis-trans isomerase H [Microtus ochrogaster]
663	1713	ag|036289|NODE_661715	1.04	17	1	1	36427.8	23950	32133.3	53200	46033.3	0	118000	20100	0.810347	1.26369	13979	Best_annotation=XP_004328968_PREDICTED: protein transport protein Sec23A-like partial [Tursiops truncatus]
663	1714	ag|046795|140304CS1901556600001	1.04	12	1	1	36427.8	23950	32133.3	53200	46033.3	0	118000	20100	0.810347	1.26369	19280	Best_annotation=XP_004055157_PREDICTED: protein transport protein Sec23A-like [Gorilla gorilla gorilla]
663	1715	ag|119363|CS60.230410CS600009940001C	1.04	11	1	1	36427.8	23950	32133.3	53200	46033.3	0	118000	20100	0.810347	1.26369	20310	Best_annotation=XP_004328968_PREDICTED: protein transport protein Sec23A-like partial [Tursiops truncatus]
617	860	ag|144988|Deer_XM_018065161.1	1.78	6	1	1	62800	76166.7	49633.3	62600	77022.2	0	187000	44066.7	0.815123	1.22647	42788	PREDICTED: Capra hircus vesicle amine transport 1 (VAT1) mRNA
568	27071	sp|P02790|HEMO_HUMAN	0.82	2	1	1	197170	299333	288667	3510	154425	444667	5575	13033.3	0.818543	0.783207	51676	Hemopexin OS=Homo sapiens OX=9606 GN=HPX PE=1 SV=2
171	194	ag|165988|Deer_NM_001034698.2	0.53	18	8	1	93277.8	49333.3	82500	148000	81177.2	3665	85533.3	154333	0.828428	0.870274	54867	Bos taurus serpin family C member 1 (SERPINC1) mRNA
511	17006	tr|A0A212D4L7|A0A212D4L7_CEREH	0.83	18	3	1	129556	123667	120667	144333	115767	24933.3	230333	92033.3	0.832045	0.893568	28651	TXNDC5 OS=Cervus elaphus hippelaphus OX=46360 GN=Celaphus_00014625 PE=4 SV=1
570	1359	ag|052329|140304CS1901484100001	0.33	3	1	1	53166.7	49133.3	44233.3	66133.3	59088.9	12866.7	100900	63500	0.833233	1.11139	58496	Best_annotation=XP_005202684_PREDICTED: 60 kDa heat shock protein mitochondrial isoform X1 [Bos taurus]
570	1458	ag|101678|CS60.230410CS6000033800003	0.33	4	1	1	53166.7	49133.3	44233.3	66133.3	59088.9	12866.7	100900	63500	0.833233	1.11139	43402	Best_annotation=XP_005676359_PREDICTED: 60 kDa heat shock protein mitochondrial isoform X1 [Capra hircus]
461	1121	ag|110933|CS60.230410CS6000074900021	1.34	8	2	2	127556	123667	87666.7	171333	111339	10585	245333	78100	0.836973	0.87287	41884	Best_annotation=XP_005682096_PREDICTED: calnexin isoform X2 [Capra hircus]
381	624	ag|145139|Deer_XM_018064990.1	0.87	11	2	2	178322	135967	200667	198333	195422	161300	339000	85966.7	0.837091	1.09589	29669	PREDICTED: Capra hircus LIM and SH3 protein 1 (LASP1) mRNA
201	162	ag|100467|CS60.230410CS6000026400002	0.54	6	4	1	111556	107333	117667	109667	98430	4190	214000	77100	0.841631	0.882341	68053	Best_annotation=XP_005700910_PREDICTED: moesin [Capra hircus]
50	374	ag|133219|sp|P21379|HBA_RANTA	0.43	59	8	2	3.93333e+06	6530000	2.71333e+06	2.55667e+06	4.50556e+06	1.99667e+06	2100000	9420000	0.846953	1.14548	15101	Hemoglobin subunit alpha OS=Rangifer tarandus GN=HBA PE=1 SV=1
50	375	ag|133217|sp|P01971|HBA_ALCAA	0.43	58	8	2	3.93333e+06	6530000	2.71333e+06	2.55667e+06	4.50556e+06	1.99667e+06	2100000	9420000	0.846953	1.14548	15246	Hemoglobin subunit alpha OS=Alces alces alces GN=HBA PE=1 SV=2
180	206	ag|103071|CS60.230410CS6000042500011	0.48	38	10	4	163200	117933	166333	205333	152744	151667	229667	76900	0.847085	0.935934	41356	Best_annotation=XP_005888733_PREDICTED: phosphoglycerate kinase 1 [Bos mutus]
296	532	ag|104714|CS60.230410CS6000050900001	0.52	13	4	1	153000	165000	158333	135667	137742	5560	265333	142333	0.849804	0.900276	53094	Best_annotation=XP_005675926_PREDICTED: collagen alpha-1(III) chain [Capra hircus]
566	1682	ag|051259|140304CS1900431400001	0.36	5	1	1	80611.1	62900	67266.7	111667	72077.8	80566.7	0	135667	0.850183	0.894142	26484	Best_annotation=XP_005225488_PREDICTED: retinol-binding protein 4 isoform X1 [Bos taurus]
107	68	ag|063559|CS60.230410CS6000011700001	0.6	20	10	8	420444	447667	354667	459000	441778	331000	644333	350000	0.851249	1.05074	73592	Best_annotation=XP_005893110_PREDICTED: 78 kDa glucose-regulated protein [Bos mutus]
107	69	ag|155834|Deer_NM_001075148.1	0.6	19	10	8	420444	447667	354667	459000	441778	331000	644333	350000	0.851249	1.05074	76625	Bos taurus heat shock protein family A (Hsp70) member 5 (HSPA5) mRNA
480	820	ag|053461|140304CS1901060900001	1.47	9	1	1	110622	93100	101100	137667	97944.4	12766.7	221000	60066.7	0.853759	0.885396	14282	Best_annotation=XP_005700136_PREDICTED: 60S acidic ribosomal protein P2 [Capra hircus]
437	857	ag|048383|140304CS1900109100001	1.19	2	1	1	137778	115333	139333	158667	152667	31000	292000	135000	0.855892	1.10806	59287	Best_annotation=XP_004021489_PREDICTED: proactivator polypeptide isoform 1 [Ovis aries]
297	524	ag|139496|Deer_XM_018046433.1	0.47	11	4	4	278111	211667	245333	377333	289222	254667	344333	268667	0.856724	1.03995	45458	PREDICTED: Capra hircus aldehyde dehydrogenase 9 family member A1 (ALDH9A1) mRNA
601	17042	sp|A2I7N2|SPA36_BOVIN	0.73	3	1	1	36261.1	16800	43333.3	48650	40922.2	1000	42966.7	78800	0.858638	1.12854	46390	Serpin A3-6 OS=Bos taurus OX=9913 GN=SERPINA3-6 PE=3 SV=1
601	17043	tr|A0A0A0MP89|A0A0A0MP89_BOVIN	0.73	3	1	1	36261.1	16800	43333.3	48650	40922.2	1000	42966.7	78800	0.858638	1.12854	46948	Serpin A3-8 OS=Bos taurus OX=9913 GN=SERPINA3-8 PE=3 SV=1
601	17044	sp|A6QPQ2|SPA38_BOVIN	0.73	3	1	1	36261.1	16800	43333.3	48650	40922.2	1000	42966.7	78800	0.858638	1.12854	46964	Serpin A3-8 OS=Bos taurus OX=9913 GN=SERPINA3-8 PE=2 SV=1
261	482	ag|050118|140304CS1901271400001	1.29	24	4	4	311444	280333	284333	369667	343989	83633.3	673000	275333	0.862289	1.1045	34899	Best_annotation=NP_001096720_NADH-cytochrome b5 reductase 3 [Bos taurus]
455	286	ag|119210|CS60.230410CS600009910000E	0.72	5	2	2	111333	89066.7	93933.3	151000	102978	26233.3	165367	117333	0.862896	0.92495	54055	Best_annotation=XP_005895181_PREDICTED: ribonuclease inhibitor [Bos mutus]
376	861	ag|100449|CS60.230410CS6000026200001	0.6	15	2	2	286778	219000	272000	369333	301444	190000	426667	287667	0.86604	1.05114	16103	Best_annotation=XP_005893376_PREDICTED: thioredoxin isoform X1 [Bos mutus]
47	429	ag|101015|CS60.230410CS600000030003E	0.51	21	5	1	498944	298667	284500	913667	435778	330000	0	977333	0.867102	0.873399	27671	Best_annotation=NP_001077269_immunoglobulin lambda-like polypeptide 1 precursor [Bos taurus]
518	954	ag|102127|CS60.230410CS6000003700008	0.59	14	2	2	79900	68700	88533.3	82466.7	88578.9	15070	183000	67666.7	0.870469	1.10862	29399	Best_annotation=XP_004398810_PREDICTED: ferritin heavy chain-like [Odobenus rosmarus divergens]
619	1185	ag|030305|NODE_366137	0.47	5	1	1	5025.56	2360	4780	7936.67	5795	0	14000	3385	0.872974	1.15311	37600	Best_annotation=XP_005661663_PREDICTED: lamin-B1 isoform X2 [Sus scrofa]
619	1251	ag|186163|Deer_XM_019964619.1	0.47	9	1	1	5025.56	2360	4780	7936.67	5795	0	14000	3385	0.872974	1.15311	20913	PREDICTED: Bos indicus lamin B1 (LMNB1) mRNA
153	275	ag|179760|Deer_XM_012158519.2	0.62	35	7	7	703000	440000	726000	943000	668222	416667	920333	667667	0.874011	0.950529	26306	PREDICTED: Ovis aries musimon transgelin 2 (TAGLN2) transcript variant X5 mRNA
153	276	ag|050140|010607CEIE020150HT_CS19	0.62	39	7	7	703000	440000	726000	943000	668222	416667	920333	667667	0.874011	0.950529	23576	Best_annotation=XP_005677294_PREDICTED: transgelin-2 isoform X1 [Capra hircus]
153	277	ag|185474|Deer_XM_004002658.2	0.62	38	7	7	703000	440000	726000	943000	668222	416667	920333	667667	0.874011	0.950529	24197	PREDICTED: Ovis aries transgelin 2 (TAGLN2) transcript variant X3 mRNA
153	278	ag|184095|Deer_XM_012158518.1	0.62	34	7	7	703000	440000	726000	943000	668222	416667	920333	667667	0.874011	0.950529	26496	PREDICTED: Ovis aries musimon transgelin 2 (TAGLN2) transcript variant X1 mRNA
501	27140	tr|B4DE78|B4DE78_HUMAN	0.74	25	4	1	212000	201000	195333	239667	194222	0	361667	221000	0.875151	0.916143	23502	cDNA FLJ52141 highly similar to 14-3-3 protein gamma OS=Homo sapiens OX=9606 PE=2 SV=1
501	17137	tr|L8ITE2|L8ITE2_9CETA	0.74	21	4	1	212000	201000	195333	239667	194222	0	361667	221000	0.875151	0.916143	28303	14-3-3 protein gamma OS=Bos mutus OX=72004 GN=M91_01040 PE=3 SV=1
501	17138	sp|P68252|1433G_BOVIN	0.74	21	4	1	212000	201000	195333	239667	194222	0	361667	221000	0.875151	0.916143	28253	14-3-3 protein gamma OS=Bos taurus OX=9913 GN=YWHAG PE=1 SV=2
501	17139	tr|A7Z057|A7Z057_BOVIN	0.74	21	4	1	212000	201000	195333	239667	194222	0	361667	221000	0.875151	0.916143	28303	14-3-3 protein gamma OS=Bos taurus OX=9913 GN=YWHAG PE=2 SV=1
501	27141	tr|B3KNB4|B3KNB4_HUMAN	0.74	21	4	1	212000	201000	195333	239667	194222	0	361667	221000	0.875151	0.916143	28243	cDNA FLJ14168 fis clone NT2RP2001440 highly similar to 14-3-3 protein gamma OS=Homo sapiens OX=9606 PE=2 SV=1
501	27142	sp|P61981|1433G_HUMAN	0.74	21	4	1	212000	201000	195333	239667	194222	0	361667	221000	0.875151	0.916143	28303	14-3-3 protein gamma OS=Homo sapiens OX=9606 GN=YWHAG PE=1 SV=2
300	16968	tr|A0A212DG66|A0A212DG66_CEREH	0.17	17	43	1	134667	115100	110900	178000	139817	172000	150000	97450	0.87605	1.03824	356840	Uncharacterized protein OS=Cervus elaphus hippelaphus OX=46360 GN=Celaphus_00013389 PE=4 SV=1
395	1081	ag|068770|CS60.230410CS6000123500015	0.22	15	2	1	168556	121000	112667	272000	180222	163333	98666.7	278667	0.882112	1.06922	23676	Best_annotation=NP_001009733_ceruloplasmin precursor [Ovis aries]
100	242	ag|102302|CS60.230410CS600000380001B	0.48	44	7	6	1.84311e+06	1.75667e+06	1.65933e+06	2.11333e+06	1.77611e+06	1270000	2580000	1.47833e+06	0.883515	0.963648	21803	Best_annotation=XP_001496993_PREDICTED: peptidyl-prolyl cis-trans isomerase A-like isoform 1 [Equus caballus]
371	590	ag|112684|CS60.230410CS600008120000B	0.64	6	1	1	181122	86700	161000	295667	170778	238333	148667	125333	0.889962	0.942887	53406	Best_annotation=XP_006217794_PREDICTED: EGF-containing fibulin-like extracellular matrix protein 1 [Vicugna pacos]
452	829	ag|045144|140304CS1900010100003	0.83	10	2	2	67388.9	60233.3	88900	53033.3	60675.6	0	149667	32360	0.892798	0.900379	28259	Best_annotation=XP_849047_PREDICTED: ADP-ribosylation factor 4 isoform 2 [Canis lupus familiaris]
522	17015	tr|A0A212DII4|A0A212DII4_CEREH	0.29	27	5	1	94255.6	80766.7	58666.7	143333	86166.7	0	83833.3	174667	0.892987	0.914181	29831	APOA4 OS=Cervus elaphus hippelaphus OX=46360 GN=Celaphus_00008943 PE=3 SV=1
242	405	ag|155910|Deer_NM_174058.2	0.74	14	4	4	639889	364667	724667	830333	672778	601000	1.01667e+06	400667	0.893084	1.0514	46802	Bos taurus fibromodulin (FMOD) mRNA
200	455	ag|101800|CS60.230410CS6000034500001	0.5	33	5	5	442667	344333	436333	547333	424222	238000	662000	372667	0.900249	0.958333	29867	Best_annotation=XP_003904124_PREDICTED: phosphoglycerate mutase 1 [Papio anubis]
200	456	ag|101801|CS60.230410CS6000034500002	0.5	30	5	5	442667	344333	436333	547333	424222	238000	662000	372667	0.900249	0.958333	31974	Best_annotation=XP_860038_PREDICTED: phosphoglycerate mutase 1 isoform 4 [Canis lupus familiaris]
81	57	ag|047674|140304CS1901079300002	0.55	29	15	9	527111	531000	464667	585667	554444	256667	947000	459667	0.901704	1.05185	72647	Best_annotation=XP_005985783_PREDICTED: LOW QUALITY PROTEIN: heat shock 70kDa protein 8 [Pantholops hodgsonii]
197	228	ag|027297|NODE_2557560	0.4	24	5	5	404333	301333	388000	523667	392889	346333	510000	322333	0.902294	0.971696	38849	Best_annotation=XP_006203274_PREDICTED: dihydropyrimidinase-related protein 2 isoform X2 [Vicugna pacos]
341	1231	ag|053062|140304CS1901710500001	0.46	14	2	2	87177.8	54333.3	116000	91200	91088.9	71900	139000	62366.7	0.902695	1.04486	22052	Best_annotation=XP_006239331_PREDICTED: cell division control protein 42 homolog isoform X1 [Rattus norvegicus]
95	16994	tr|A0A212DIY7|A0A212DIY7_CEREH	0.98	77	9	2	5.40444e+06	8.20333e+06	4.26333e+06	3.74667e+06	5968000	304000	3400000	14200000	0.90514	1.10428	13080	Uncharacterized protein (Fragment) OS=Cervus elaphus hippelaphus OX=46360 GN=Celaphus_00009169 PE=3 SV=1
95	16995	tr|A0A220IGA1|A0A220IGA1_RUCDU	0.98	66	10	2	5.40444e+06	8.20333e+06	4.26333e+06	3.74667e+06	5968000	304000	3400000	14200000	0.90514	1.10428	15925	Adult beta-globin OS=Rucervus duvaucelii OX=43328 PE=3 SV=1
95	16996	tr|A0A220IG98|A0A220IG98_9CETA	0.98	77	11	2	5.40444e+06	8.20333e+06	4.26333e+06	3.74667e+06	5968000	304000	3400000	14200000	0.90514	1.10428	15939	Adult beta-globin OS=Cervus hanglu bactrianus OX=164931 PE=3 SV=1
95	16997	tr|A0A220IG96|A0A220IG96_ELADA	0.98	77	11	2	5.40444e+06	8.20333e+06	4.26333e+06	3.74667e+06	5968000	304000	3400000	14200000	0.90514	1.10428	15939	Adult beta-globin OS=Elaphurus davidianus OX=43332 PE=3 SV=1
95	16998	tr|A0A220IGB1|A0A220IGB1_CEREL	0.98	77	11	2	5.40444e+06	8.20333e+06	4.26333e+06	3.74667e+06	5968000	304000	3400000	14200000	0.90514	1.10428	15939	Adult beta-globin OS=Cervus elaphus OX=9860 PE=3 SV=1
348	737	ag|053424|140304CS1901306000001	0.04	6	1	1	208444	237000	250000	138333	218444	190000	352333	113000	0.90521	1.04797	25873	Best_annotation=XP_004010585_PREDICTED: peptidyl-prolyl cis-trans isomerase B [Ovis aries]
653	1507	ag|114384|CS60.230410CS6000008600003	0.5	7	1	1	37238.9	35866.7	32950	42900	39731.1	2060	67833.3	49300	0.905918	1.06693	27165	Best_annotation=XP_005207029_PREDICTED: rho GDP-dissociation inhibitor 2 isoform X1 [Bos taurus]
653	1790	ag|114386|CS60.230410CS6000008600005	0.5	15	1	1	37238.9	35866.7	32950	42900	39731.1	2060	67833.3	49300	0.905918	1.06693	12457	Best_annotation=XP_005207030_PREDICTED: rho GDP-dissociation inhibitor 2 isoform X2 [Bos taurus]
653	1791	ag|114385|CS60.230410CS6000008600004	0.5	12	1	1	37238.9	35866.7	32950	42900	39731.1	2060	67833.3	49300	0.905918	1.06693	14357	Best_annotation=XP_005207029_PREDICTED: rho GDP-dissociation inhibitor 2 isoform X1 [Bos taurus]
635	1847	ag|103632|CS60.230410CS6000045400015	1.75	6	1	1	20811.1	22533.3	14966.7	24933.3	19790	27700	27550	4120	0.909012	0.950934	33888	Best_annotation=XP_001488997_PREDICTED: voltage-dependent anion-selective channel protein 3 isoformX1 [Equus caballus]
635	1848	ag|044445|140304CS1901469300001	1.75	6	1	1	20811.1	22533.3	14966.7	24933.3	19790	27700	27550	4120	0.909012	0.950934	37107	Best_annotation=XP_001488997_PREDICTED: voltage-dependent anion-selective channel protein 3 isoformX1 [Equus caballus]
326	476	ag|011215|NODE_1696375	0.51	19	3	2	137800	105333	90066.7	218000	131567	149333	69366.7	176000	0.909527	0.954765	19066	Best_annotation=NP_001009733_ceruloplasmin precursor [Ovis aries]
266	465	ag|181800|Deer_XM_012132754.2	0.04	9	2	1	79738.9	75550	67200	96466.7	81433.3	84066.7	99600	60633.3	0.911291	1.02125	34840	PREDICTED: Ovis aries musimon fascin actin-bundling protein 1 (FSCN1) transcript variant X3 mRNA
223	305	ag|052755|140304CS1900153200001	0.54	21	6	6	333111	252000	308333	439000	347889	190667	565000	288000	0.911637	1.04436	38883	Best_annotation=XP_001085541_PREDICTED: l-lactate dehydrogenase B chain [Macaca mulatta]
434	496	ag|104890|CS60.230410CS6000051700002	0.15	4	1	1	133556	142000	119667	139000	136111	149667	163667	95000	0.913463	1.01913	32071	Best_annotation=XP_003640291_PREDICTED: peroxiredoxin-4 isoformX2 [Canis lupus familiaris]
428	907	ag|106068|CS60.230410CS600005710000A	0.5	6	1	1	171278	90166.7	128333	295333	158122	23366.7	103333	347667	0.915256	0.923192	44188	Best_annotation=NP_001243485_ceruloplasmin precursor [Bos taurus]
44	353	ag|100999|CS60.230410CS600000030002E	0.27	26	6	1	249933	137133	174667	438000	229556	0	152667	536000	0.917779	0.918467	27233	Best_annotation=XP_005691794_PREDICTED: immunoglobulin lambda-like polypeptide 1-like isoform X1 [Capra hircus]
634	1798	ag|100458|CS60.230410CS6000026300001	2.18	4	1	1	96633.3	85200	82033.3	122667	89600	52800	216000	0	0.920634	0.927216	43303	Best_annotation=NP_001095396_hsc70-interacting protein [Bos taurus]
260	401	ag|048171|140304CS1900596400001	0.26	12	3	1	105967	110000	114333	93566.7	102344	87233.3	167333	52466.7	0.921645	0.965817	29471	Best_annotation=XP_005897483_PREDICTED: moesin [Bos mutus]
94	588	ag|109394|CS60.230410CS6000000700002	3.03	25	7	3	3600000	2540000	2500000	5760000	3.73333e+06	3500000	2300000	5400000	0.929083	1.03704	30206	Best_annotation=NP_998993_IgG heavy chain precursor [Sus scrofa]
115	88	ag|168773|Deer_NM_001285732.1	0.35	30	10	5	532556	569000	458667	570000	517889	358667	818667	376333	0.929139	0.97246	48255	Capra hircus protein disulfide isomerase family A member 3 (PDIA3) mRNA
293	489	ag|171412|Deer_XM_015101963.1	0.65	34	5	5	991956	32800	2.74967e+06	193400	1.07822e+06	1580000	1193000	461667	0.931231	1.08697	16222	PREDICTED: Ovis aries cellular retinoic acid binding protein 1 (CRABP1) mRNA
293	490	ag|057956|CS60.230410CS6000106100025	0.65	26	5	5	991956	32800	2.74967e+06	193400	1.07822e+06	1580000	1193000	461667	0.931231	1.08697	21223	Best_annotation=XP_005985062_PREDICTED: cellular retinoic acid-binding protein 1 [Pantholops hodgsonii]
226	310	ag|046872|140304CS1900176500001	1.89	14	5	1	84490	97200	69550	86720	78350	14050	221000	0	0.936044	0.927329	56567	Best_annotation=XP_005984835_PREDICTED: endoplasmin [Pantholops hodgsonii]
202	386	ag|100179|CS60.230410CS6000024300003	0.38	23	5	3	242222	182333	255000	289333	250333	111000	420000	220000	0.936608	1.03349	33904	Best_annotation=XP_005325348_PREDICTED: 14-3-3 protein beta/alpha isoform X1 [Ictidomys tridecemlineatus]
337	632	ag|026998|NODE_2551031	0.18	26	4	1	87666.7	104167	59900	98933.3	93533.3	11066.7	228667	40866.7	0.936811	1.06692	25940	Best_annotation=XP_004005249_PREDICTED: LOW QUALITY PROTEIN: tenascin [Ovis aries]
459	919	ag|107557|CS60.230410CS600006280000B	0.3	12	2	2	239422	273333	253667	191267	230890	30003.3	350667	312000	0.938582	0.964363	33430	Best_annotation=XP_005688853_PREDICTED: elongation factor 1-delta isoform X1 [Capra hircus]
119	1038	ag|120167|CS60.230410CS60000107FFFFD	0.72	48	2	1	159833	23200	385300	71000	148300	49000	319333	76566.7	0.939335	0.927842	9268	Best_annotation=XP_006750672_PREDICTED: actin gamma-enteric smooth muscle-like [Leptonychotes weddellii]
539	1167	ag|110017|CS60.230410CS600007190000D	0.2	5	2	1	33277.8	14600	36400	48833.3	35522.2	0	88333.3	18233.3	0.94147	1.06745	44507	Best_annotation=NP_001033268_calponin-3 [Bos taurus]
237	220	ag|051744|140304CS1901047700003	0	6	4	1	80844.4	62100	75766.7	104667	84255.6	30200	168333	54233.3	0.942472	1.04219	83842	Best_annotation=XP_005627459_PREDICTED: heat shock protein HSP 90-beta isoform X2 [Canis lupus familiaris]
320	329	ag|044505|140304CS1901330900001	0.2	4	3	3	123556	120000	110000	140667	125667	88700	178333	109967	0.944522	1.01709	98255	Best_annotation=XP_852626_PREDICTED: transitional endoplasmic reticulum ATPase isoform 3 [Canis lupus familiaris]
559	1476	ag|148253|Deer_XM_018066347.1	0.21	5	1	1	10931.1	8860	11100	12833.3	10311.8	792	26866.7	3276.67	0.944684	0.943342	31140	PREDICTED: Capra hircus Sec23 homolog A coat complex II component (SEC23A) mRNA
313	530	ag|052482|140304CS1901210600001	0.4	12	3	3	378444	217667	394000	523667	365556	132333	658667	305667	0.94589	0.965942	48078	Best_annotation=XP_005974221_PREDICTED: olfactomedin-like protein 3 [Pantholops hodgsonii]
8	118	ag|155656|Deer_XM_005681744.2	0.08	35	18	3	1.68786e+07	1.72333e+07	19000000	1.44023e+07	1.73011e+07	5970000	2.08667e+07	2.50667e+07	0.946762	1.02504	39953	PREDICTED: Capra hircus albumin (ALB) mRNA
290	442	ag|105002|CS60.230410CS6000052300009	0.2	6	2	2	226889	136000	267000	277667	222000	334333	200000	131667	0.951126	0.978452	49552	Best_annotation=XP_005689787_PREDICTED: olfactomedin-like protein 1 [Capra hircus]
335	690	ag|101434|CS60.230410CS6000032200009	0.56	9	3	1	78555.6	53100	90566.7	92000	80155.6	45933.3	120667	73866.7	0.952512	1.02037	32597	Best_annotation=XP_003252929_PREDICTED: heterogeneous nuclear ribonucleoprotein A1 isoform 2 [Nomascus leucogenys]
335	691	ag|051964|140304CS1900710600001	0.56	8	3	1	78555.6	53100	90566.7	92000	80155.6	45933.3	120667	73866.7	0.952512	1.02037	33344	Best_annotation=XP_004583206_PREDICTED: heterogeneous nuclear ribonucleoprotein A1 isoform X2 [Ochotona princeps]
340	16969	tr|F1MRZ6|F1MRZ6_BOVIN	0.24	10	16	2	267889	255000	204667	344000	279833	77700	657000	104800	0.953643	1.04459	244614	Tenascin C OS=Bos taurus OX=9913 GN=TNC PE=4 SV=2
375	514	ag|044322|140304CS1901068400001	0.37	12	3	3	146000	196667	118667	122667	151333	66866.7	322000	65133.3	0.955101	1.03653	33519	Best_annotation=XP_006161400_PREDICTED: 40S ribosomal protein SA-like [Tupaia chinensis]
473	949	ag|045826|140304CS1901142300001	0.11	6	1	1	41500	39466.7	39333.3	45700	42950.6	8685	90033.3	30133.3	0.955505	1.03495	25855	Best_annotation=XP_005904820_PREDICTED: elongation factor 1-beta isoform X2 [Bos mutus]
91	111	ag|053198|140304CS1901020900001	0.28	33	12	12	1.37444e+06	1540000	1.24667e+06	1.33667e+06	1.33644e+06	585333	2600000	824000	0.9556	0.972352	48887	Best_annotation=XP_005982576_PREDICTED: serpin H1 [Pantholops hodgsonii]
283	309	ag|052976|140304CS1900014000001	0.24	16	4	4	142267	87800	148333	190667	139111	38666.7	276333	102333	0.969294	0.977819	49853	Best_annotation=NP_001193274_protein disulfide-isomerase A6 precursor [Bos taurus]
7	219	ag|052058|140304CS19010096FFFDD	0.03	72	12	1	3.33667e+06	3.31667e+06	2.84333e+06	3850000	3.31667e+06	2.56333e+06	3.19333e+06	4.19333e+06	0.973056	0.994006	18802	Best_annotation=XP_005322001_PREDICTED: collagen alpha-1(I) chain [Ictidomys tridecemlineatus]
546	1122	ag|101504|CS60.230410CS6000032800005	2.32	13	1	1	40150	0	61450	59000	41277.8	0	87600	36233.3	0.973895	1.02809	10677	Best_annotation=XP_005953924_PREDICTED: copper transport protein ATOX1 [Pantholops hodgsonii]
546	1123	ag|052838|140304CS1900972700001	2.32	13	1	1	40150	0	61450	59000	41277.8	0	87600	36233.3	0.973895	1.02809	10601	Best_annotation=XP_005953924_PREDICTED: copper transport protein ATOX1 [Pantholops hodgsonii]
218	166	ag|051743|140304CS1901047700002	0.19	7	4	2	182356	185667	98733.3	262667	179111	25000	378333	134000	0.978788	0.982208	76233	Best_annotation=XP_005000587_PREDICTED: heat shock protein HSP 90-alpha isoform X2 [Cavia porcellus]
367	762	ag|023825|NODE_2393972	0.08	9	2	2	249556	202667	212667	333333	251678	247667	379667	127700	0.981056	1.0085	45149	Best_annotation=NP_001106288_calpain-2 catalytic subunit [Ovis aries]
355	443	ag|051835|140304CS1901297800001	0.12	8	2	2	219767	283000	77633.3	298667	216889	120233	414000	116433	0.982252	0.986905	39282	Best_annotation=XP_005905057_PREDICTED: reticulocalbin-3 [Bos mutus]
355	444	ag|185149|Deer_XM_004015373.2	0.12	7	2	2	219767	283000	77633.3	298667	216889	120233	414000	116433	0.982252	0.986905	42617	PREDICTED: Ovis aries reticulocalbin 3 (RCN3) mRNA
427	17050	tr|I7CT57|I7CT57_BOVIN	0.02	25	7	1	576333	502333	470000	756667	580667	616333	272333	853333	0.983029	1.00752	53328	Vitamin D binding protein OS=Bos taurus OX=9913 PE=2 SV=1
427	17051	sp|Q3MHN5|VTDB_BOVIN	0.02	25	7	1	576333	502333	470000	756667	580667	616333	272333	853333	0.983029	1.00752	53342	Vitamin D-binding protein OS=Bos taurus OX=9913 GN=GC PE=2 SV=1
427	17052	tr|F1N5M2|F1N5M2_BOVIN	0.02	25	7	1	576333	502333	470000	756667	580667	616333	272333	853333	0.983029	1.00752	53356	Vitamin D-binding protein OS=Bos taurus OX=9913 GN=GC PE=4 SV=2
427	17053	tr|L8IG17|L8IG17_9CETA	0.02	25	7	1	576333	502333	470000	756667	580667	616333	272333	853333	0.983029	1.00752	53415	Vitamin D-binding protein OS=Bos mutus OX=72004 GN=M91_14614 PE=4 SV=1
196	61	ag|160844|Deer_XM_005226483.2	0.07	9	6	4	318111	365667	268000	320667	320444	120000	482333	359000	0.984098	1.00733	107990	PREDICTED: Bos taurus vinculin (VCL) transcript variant X3 mRNA
33	39	ag|050281|140304CS1901028600001	0.07	33	21	16	2.31778e+06	1600000	2.28667e+06	3.06667e+06	2.33111e+06	1.33667e+06	2.93333e+06	2.72333e+06	0.984759	1.00575	83842	Best_annotation=NP_001106755_gelsolin isoform a precursor [Bos taurus]
308	497	ag|013593|NODE_1844528	0.04	35	3	3	469000	230667	479667	696667	467222	419667	574333	407667	0.990801	0.996209	11349	Best_annotation=XP_005222390_PREDICTED: protein AHNAK2 isoform X2 [Bos taurus]
531	17005	tr|L8HVY9|L8HVY9_9CETA	0.03	16	4	2	541333	543667	460333	620000	543000	450667	378333	800000	0.990949	1.00308	52104	Hemopexin OS=Bos mutus OX=72004 GN=M91_19706 PE=3 SV=1
183	105	ag|053457|140304CS1901060400001	0.04	17	9	9	390778	335000	319667	517667	392222	251333	638667	286667	0.992209	1.0037	79016	Best_annotation=XP_005897385_PREDICTED: annexin A6 [Bos mutus]
173	295	ag|137281|Deer_XM_018052355.1	0.03	27	5	4	395444	317333	360333	508667	394667	360667	514667	308667	0.993118	0.998033	29623	PREDICTED: Capra hircus dihydropyrimidinase like 2 (DPYSL2) transcript variant X2 mRNA
234	379	ag|027192|NODE_2555256	0.01	35	3	1	73500	44566.7	80433.3	95500	73644.4	65366.7	93400	62166.7	0.994006	1.00197	11250	Best_annotation=XP_005966890_PREDICTED: neuroblast differentiation-associated protein AHNAK [Pantholops hodgsonii]
443	668	ag|050067|140304CS1900013300001	0.01	5	1	1	51400	42400	45733.3	66066.7	51344.4	57966.7	54766.7	41300	0.995364	0.998919	39249	Best_annotation=XP_005956944_PREDICTED: transketolase isoform X3 [Pantholops hodgsonii]
286	408	ag|104393|CS60.230410CS6000049200003	0.04	19	3	2	175589	219000	184467	123300	174889	0	389333	135333	0.995532	0.996013	20371	Best_annotation=XP_005668989_PREDICTED: nucleoside diphosphate kinase B isoform X1 [Sus scrofa]

## Sheet: Table S6
Table S6: Differentially expressed proteins with p value ≤ 0.05 in FP vs. DPP.
Protein Group	Protein ID	Accession	Significance	Coverage (%)	#Peptides	#Unique	Biological average of FP	Average of 17 FP	Average of 19 FP	Average of 20 FP	Biological average of DPP	Average of 18 DPP	Average of 19 DPP	Average of 20 DPP	T.test	DPP:FP	Avg. Mass	Gene name (NCBI)	Gene symbols (Hugo/HGNC )	Description
253	437	ag|173157|Deer_XM_015099418.1	49.86	28	4	4	445778	295333	500667	541333	1.56667e+06	1780000	1510000	1410000	0.00112305	3.51446	25130	CSRP1	CSRP1	PREDICTED: Ovis aries cysteine and glycine rich protein 1 (CSRP1) transcript variant X1 mRNA
130	343	ag|164201|Deer_XM_005206502.3	31.53	36	5	5	524667	463333	450333	660333	1340000	1.55333e+06	1.32333e+06	1.14333e+06	0.00397057	2.554	17421	MYL6	MYL6	PREDICTED: Bos taurus myosin light chain 6 (MYL6) transcript variant X1 mRNA
15	75	ag|050292|140304CS1901052300004	74.69	59	16	2	516556	754667	352333	442667	2.66778e+06	1.86333e+06	3200000	2940000	0.0072882	5.16455	44295	ACTA2	ACTA2	Best_annotation=XP_005602432_PREDICTED: actin aortic smooth muscle isoform X2 [Equus caballus]
58	209	ag|045959|140304CS1901017300001	24.81	31	8	8	5.94222e+06	6.19667e+06	6.54333e+06	5.08667e+06	2.84444e+06	2.89333e+06	3620000	2020000	0.00830283	0.478684	40672	DCN	DCN	Best_annotation=XP_005959611_PREDICTED: decorin isoform X2 [Pantholops hodgsonii]
457	1416	ag|062091|CS60.230410CS600011410001A	1.25	11	1	1	168778	161333	150333	194667	241111	233667	258333	231333	0.0103833	1.42857	13294	FKBP1A	FKBP1A	Best_annotation=XP_001086691_PREDICTED: peptidyl-prolyl cis-trans isomerase FKBP1A-like [Macaca mulatta]
457	1417	ag|043858|140304CS1901767700001	1.25	9	1	1	168778	161333	150333	194667	241111	233667	258333	231333	0.0103833	1.42857	15055	FKBP1A	FKBP1A	Best_annotation=XP_001086691_PREDICTED: peptidyl-prolyl cis-trans isomerase FKBP1A-like [Macaca mulatta]
457	1658	ag|168526|Deer_NM_001077969.2	1.25	11	1	1	168778	161333	150333	194667	241111	233667	258333	231333	0.0103833	1.42857	13407	FKBP1A	FKBP1A	Bos taurus FK506 binding protein 1A 12kDa-like (LOC526524) mRNA
543	693	ag|028723|NODE_2633933	5	2	1	1	10423.9	7305	14166.7	9800	30444.4	36100	32433.3	22800	0.010782	2.92064	57301	ALPL	ALPL	Best_annotation=XP_005957095_PREDICTED: alkaline phosphatase tissue-nonspecific isozyme [Pantholops hodgsonii]
11	14	ag|140427|Deer_XM_018040719.1	7.8	42	56	2	229556	212000	224333	252333	478778	583333	468000	385000	0.0132277	2.08567	168290	COL6A3	COL6A3	PREDICTED: Capra hircus collagen type VI alpha 3 chain (COL6A3) transcript variant X4 mRNA
353	873	ag|046611|140304CS1900951600001	6.21	12	1	1	970556	1.06333e+06	1.09033e+06	758000	385222	292000	294667	569000	0.0141475	0.396909	19716	COL5A2	COL5A2	Best_annotation=XP_001501867_PREDICTED: collagen alpha-2(V) chain [Equus caballus]
499	1335	ag|066948|CS60.230410CS600012150004E	2.91	6	2	2	146589	114433	148333	177000	236000	232333	262667	213000	0.0181114	1.60994	36920	WDR1	WDR1	Best_annotation=XP_003898533_PREDICTED: WD repeat-containing protein 1 isoform 2 [Papio anubis]
62	80	ag|009628|NODE_162697	4.95	41	11	2	281778	244000	322000	279333	95444.4	23733.3	82266.7	180333	0.0216291	0.338722	38934	FGB	FGB	Best_annotation=XP_005217493_PREDICTED: fibrinogen beta chain isoform X2 [Bos taurus]
135	381	ag|100392|CS60.230410CS6000025900003	9.64	37	6	6	282111	188667	298667	359000	508111	448000	630000	446333	0.0454674	1.8011	25863	PRDX2	PRDX2	Best_annotation=XP_005962883_PREDICTED: peroxiredoxin-2 [Pantholops hodgsonii]
334	642	ag|148319|Deer_XM_018066211.1	14.57	15	3	3	282222	139667	260333	446667	551778	496333	634667	524333	0.0525004	1.95512	23256	FBLN5	FBLN5	PREDICTED: Capra hircus fibulin 5 (FBLN5) transcript variant X2 mRNA
334	643	ag|078007|CS60.230410CS6000131700057	14.57	14	3	3	282222	139667	260333	446667	551778	496333	634667	524333	0.0525004	1.95512	24206	FBLN5	FBLN5	Best_annotation=XP_005910315_PREDICTED: fibulin-5 isoform X1 [Bos mutus]
